# Supplementary material
Source: HighWire-hosted journal article supplement (https://jpet.aspetjournals.org/highwire/filestream/142065/field_highwire_adjunct_files/0/249292SupplData.pdf)
Supplement: 249292SupplData.pdf [file 249292SupplData.pdf]

## Supplemental Material

### Analysis of the Indacaterol-Regulated Transcriptome in Human Airway Epithelial Cells Implicates Gene Expression Changes in the Adverse and Therapeutic Effects of $\beta_2$ -Adrenoceptor Agonists

Dong Yan, Omar Hamed, Taruna Joshi, Mahmoud M. Mostafa, Kyla C. Jamieson, Radhika Joshi, Robert Newton & Mark A. Giembycz

*Departments of Physiology & Pharmacology (D.Y., O.H., K.C.J., T.J., R.J., M.A.G.) and Cell Biology & Anatomy (R.N., M.M.M.), Snyder Institute for Chronic Diseases, Cumming School of Medicine, University of Calgary, Calgary, Alberta, Canada.*

(A)

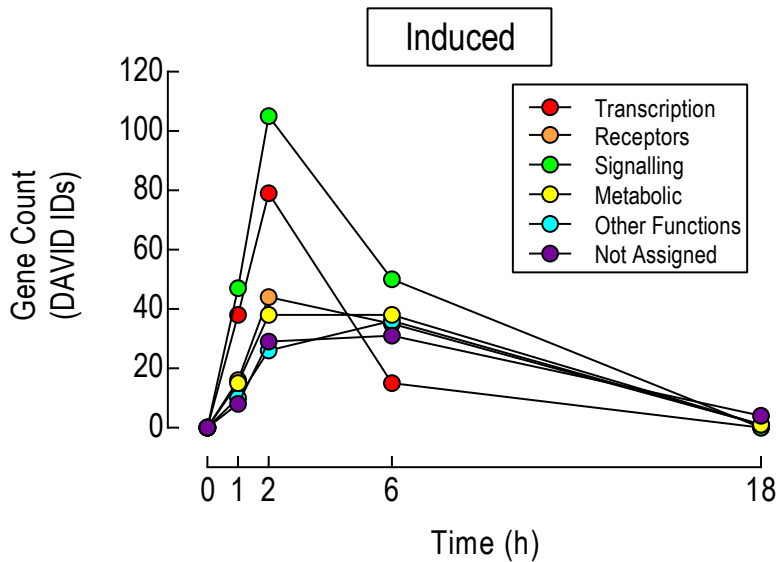

(B)

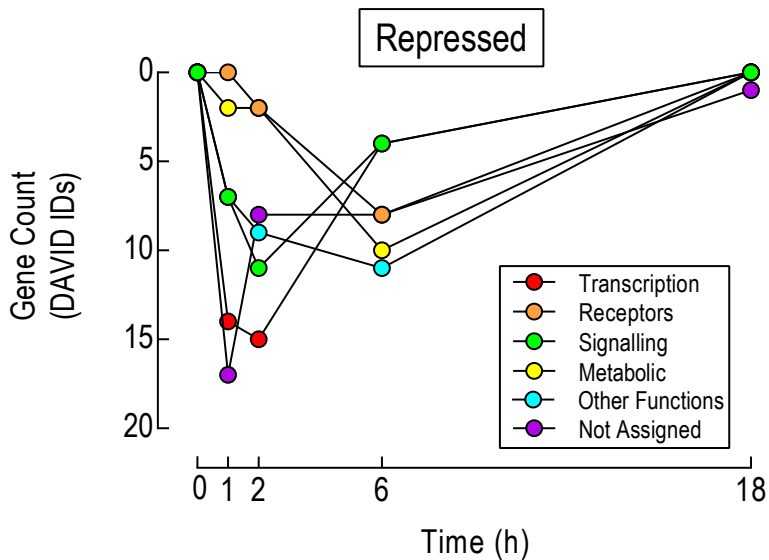

**Supplemental Fig. 1.** Effect of indacaterol on the number of significantly induced and repressed genes (panels A and B respectively) at 1h, 2h, 6h and 18h that were annotated with one of the six broad GO terms used in figure 4.

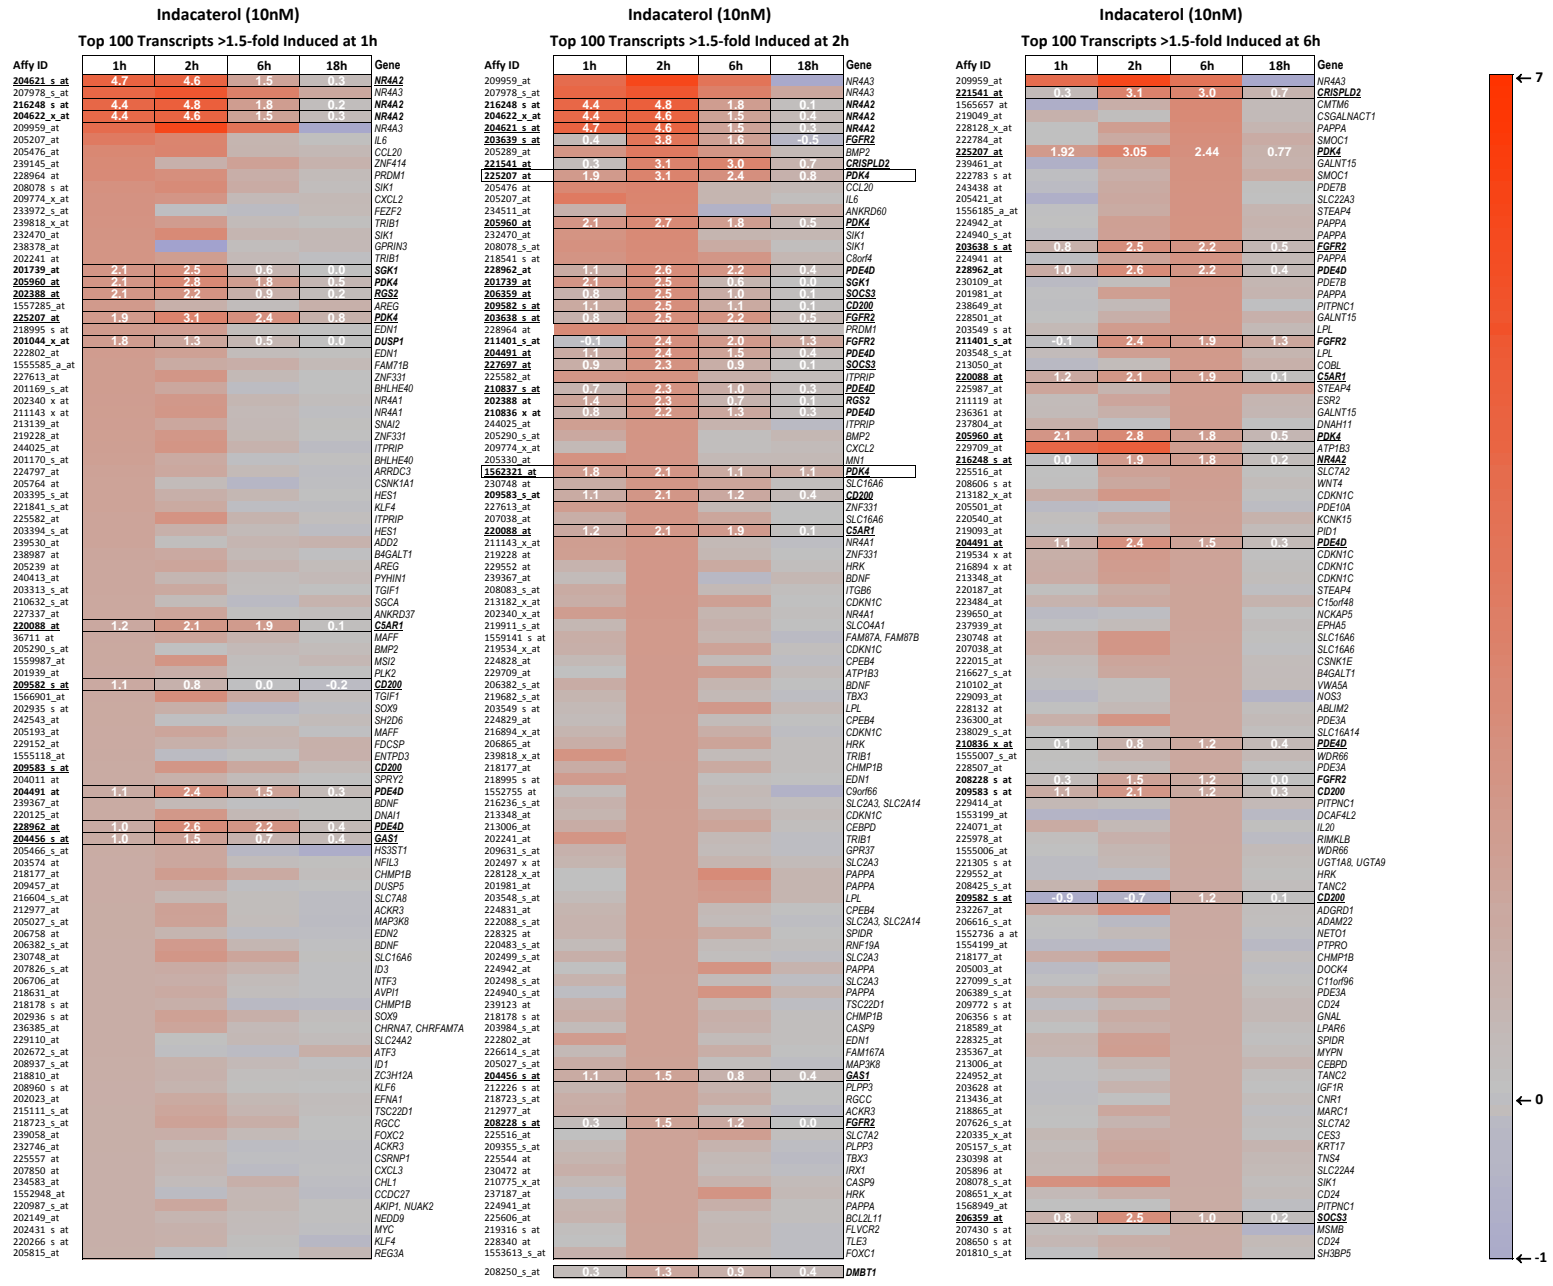

**Supplemental Fig. 2.** Heat maps showing the effect of indacaterol on gene induction in BEAS-2B cells treated with indacaterol (10nM) for 1h, 2h and 6h. The top induced transcripts by probe set that were statistically different from time-matched, vehicle-treated cells at each time-point (FDR  $P$ -value <0.1) were ranked highest to lowest and presented as heat maps relative to changes of the same transcripts at the other two time-points. The colour scale is logarithmic (base 2) with the most intense red and blue colours representing a 128-fold increase ( $\log_2 = 7$ ) and a 2-fold decrease ( $\log_2 = -1$ ) in gene expression respectively. The right hand-side and left hand-side of every row in each heat map shows the gene name and corresponding Affymetrix identification number (Affy ID). Genes validated by PCR are underlined and bolded in black, and their expression level changes are shown in each cell in  $\log_2$  format. At 2h, *DMBT1* was the 128th highest transcript induced by indacaterol.

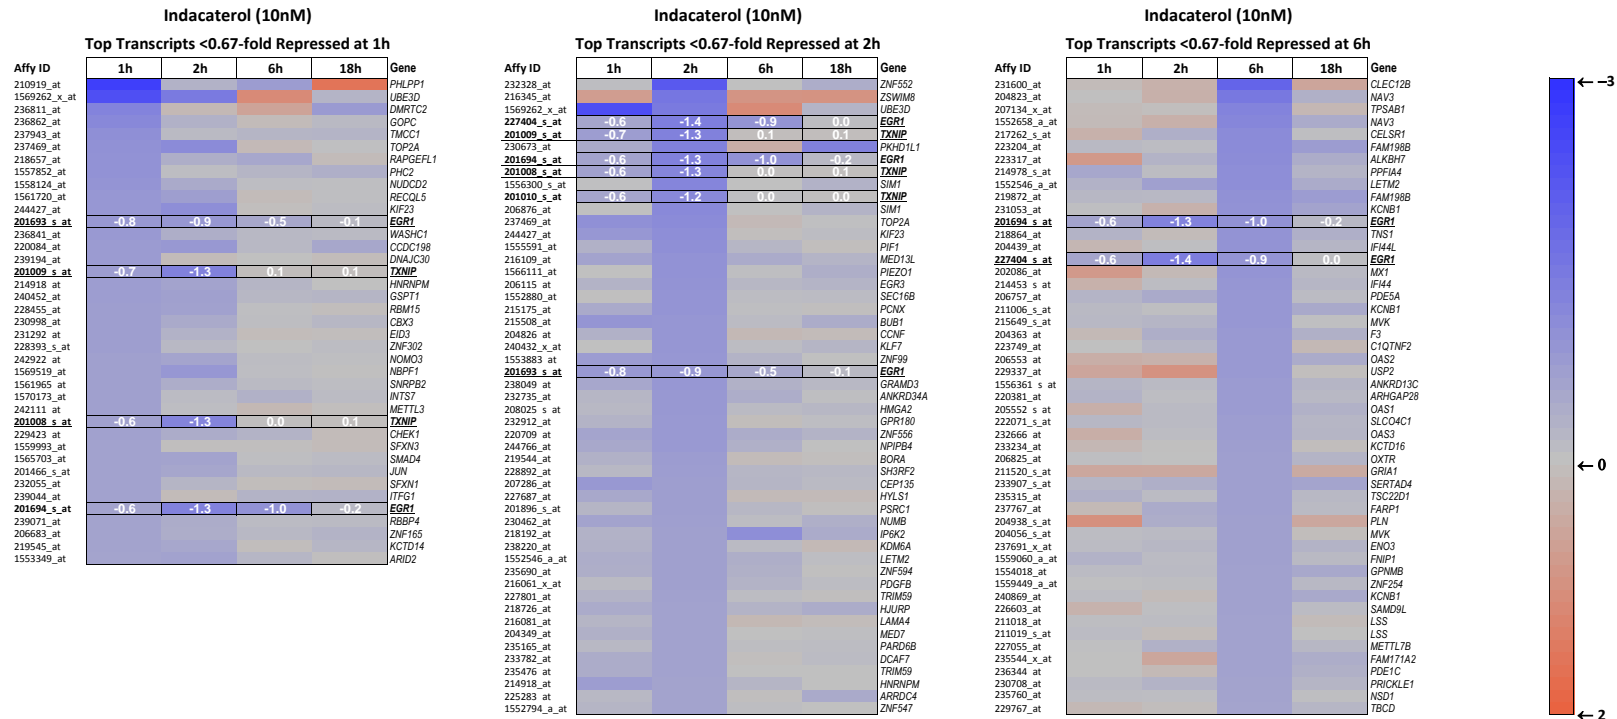

**Supplemental Fig. 3.** Heat maps showing the effect of indacaterol on gene repression in BEAS-2B cells treated with indacaterol (10nM) for 1h, 2h and 6h. The top repressed transcripts by probe set that were statistically different from time-matched, vehicle-treated cells at each time-point (FDR  $P$  value <0.1) were ranked highest to lowest and presented as heat maps relative to changes of same transcripts at the other two time-points. The colour scale is logarithmic (base 2) with the most intense blue and red colours representing a 8-fold decrease ( $\log_2 = -3$ ) and an 4-fold increase ( $\log_2 = 2$ ) in gene expression respectively. The right hand-side and left hand-side of every row in each heat map shows the gene name and corresponding Affymetrix identification number (Affy ID). Genes validated by PCR are underlined and bolded in black, and their expression level changes are shown in each cell in  $\log_2$  format.

**Supplemental TABLE 1.** Donor demographics.

| <b>Donor ID#</b> | <b>Age</b> | <b>Gender</b> | <b>Ethnicity</b> | <b>Smoker</b> | <b>Cause of Death</b>     | <b>Source of Epithelial Cells</b> |
|------------------|------------|---------------|------------------|---------------|---------------------------|-----------------------------------|
| p42              | 18         | Male          | Caucasian        | No            | Head Trauma               | Right Lung                        |
| p48              | 22         | Male          | Caucasian        | Yes           | Anoxia                    | Left Lung                         |
| p72              | 62         | Male          | Caucasian        | No            | Intracerebral Haemorrhage | Right Lung                        |
| p78              | 60         | Male          | Hispanic         | Yes           | Head Trauma               | Left Lung                         |
| p82              | 42         | Male          | Caucasian        | Yes           | Intracerebral Haemorrhage | Right Lung                        |

**Supplemental TABLE 2.** Primer pairs for real-time PCR. Official HGNC gene symbols are shown. When appropriate common gene symbols are provided in parentheses. Generic primers were used for genes that encode multiple isoforms.

| <b>Gene</b>                               | <b>Oligonucleotides</b>         | <b>Accession Number(s)</b>                                                                                                                                                                                                                |
|-------------------------------------------|---------------------------------|-------------------------------------------------------------------------------------------------------------------------------------------------------------------------------------------------------------------------------------------|
| <b><i>AVP11</i></b>                       |                                 | NM_021732.2                                                                                                                                                                                                                               |
| Forward                                   | 5' -AAGGCTGTGGAAGAGGTTGG-3'     |                                                                                                                                                                                                                                           |
| Reverse                                   | 5' -TGTGGATGCTCACACTGAAGG-3'    |                                                                                                                                                                                                                                           |
| <b><i>BDNF</i></b>                        |                                 | NM_001352269.1, NM_001352270.1, NM_001352267.1, NM_001352271, NM_020734.4, NM_001352268.1, NM_001297776.1, XM_017019690.1, XM_017019683.1, XM_017019684.1, XM_017019685.1, XM_017019686.1, XM_017019687.1, XM_017019688.1, XM_017019689.1 |
| Forward                                   | 5' -GGCGGCAGACAAAAAGACTG-3'     |                                                                                                                                                                                                                                           |
| Reverse                                   | 5' -TGGGATTGCACTTGGTCTCG-3'     |                                                                                                                                                                                                                                           |
| <b><i>C5ARI</i></b>                       |                                 | NM_001736.3                                                                                                                                                                                                                               |
| Forward                                   | 5' -TCCTCCGGAACGTGTTGACT-3'     |                                                                                                                                                                                                                                           |
| Reverse                                   | 5' -AGCGCGTGAATGACTTGCT-3'      |                                                                                                                                                                                                                                           |
| <b><i>CD200</i></b>                       |                                 | NM_005944.5, NM_001004196.2                                                                                                                                                                                                               |
| Forward                                   | 5' -GGACTGTGACCGACTTTAAGCAA-3'  |                                                                                                                                                                                                                                           |
| Reverse                                   | 5' -AGCAATAGCGGAAGTGAACC-3'     |                                                                                                                                                                                                                                           |
| <b><i>CDKN1C (p57<sup>kip2</sup>)</i></b> |                                 | NM_000076.2, NM_001122630.1, NM_001122631.1                                                                                                                                                                                               |
| Forward                                   | 5' -CTGTCCGGCCCTCTGATCT-3'      |                                                                                                                                                                                                                                           |
| Reverse                                   | 5' -CATCGCCCGACGACTTCT-3'       |                                                                                                                                                                                                                                           |
| <b><i>CEBPD</i></b>                       |                                 | NM_005195                                                                                                                                                                                                                                 |
| Forward                                   | 5' -GGAGATGCAGCAGAAGTTGGT-3'    |                                                                                                                                                                                                                                           |
| Reverse                                   | 5' -CGCGCTGGTGCAGCTT-3'         |                                                                                                                                                                                                                                           |
| <b><i>DEPDC7</i></b>                      |                                 | NM_139160.2, NM_001077242.1                                                                                                                                                                                                               |
| Forward                                   | 5' -GACTCTCAGGAAGATGAGTGG-3'    |                                                                                                                                                                                                                                           |
| Reverse                                   | 5' -GTCTGGTTGCTCAGGAAAGC-3'     |                                                                                                                                                                                                                                           |
| <b><i>DMBT1</i></b>                       |                                 | NM_004406.2, NM_007329.2, NM_017579.2, NM_001320644.1                                                                                                                                                                                     |
| Forward                                   | 5' -GGTGGCATCCAACAACACTACAA-3'  |                                                                                                                                                                                                                                           |
| Reverse                                   | 5' -GTAGGATGGGCTGGAGAATGT-3'    |                                                                                                                                                                                                                                           |
| <b><i>DUSP1 (MKP1)</i></b>                |                                 | NM_004417.3                                                                                                                                                                                                                               |
| Forward                                   | 5' -CGCGCAAGTCTTCTTCCTCA-3'     |                                                                                                                                                                                                                                           |
| Reverse                                   | 5' -GATGCTTCGCCTCTGCTTCA-3'     |                                                                                                                                                                                                                                           |
| <b><i>EDN1</i></b>                        |                                 | NM_001955.4, NM_001168319.1                                                                                                                                                                                                               |
| Forward                                   | 5' -TGATTTTCTCTCTGCTGTTTGTGG-3' |                                                                                                                                                                                                                                           |
| Reverse                                   | 5' -GCGCCTAAGACTGCTGTTTCT-3'    |                                                                                                                                                                                                                                           |

| <b>Gene</b>         | <b>Oligonucleotides</b>        | <b>Accession Number(s)</b>                                      |
|---------------------|--------------------------------|-----------------------------------------------------------------|
| <b><i>EGRI</i></b>  |                                | NM_001964.2                                                     |
| Forward             | 5' -ACCTGACCGCAGAGTCTTTT-3'    |                                                                 |
| Reverse             | 5' -GAGTGGTTTGGCTGGGGTAA-3'    |                                                                 |
| <b><i>EPHA4</i></b> |                                | NM_001304537.1, NM_001304536.1, NM_004438.4, XM_005246374.2     |
| Forward             | 5' -GGATCATTGGAGATGGGGCT-3'    |                                                                 |
| Reverse             | 5' -GTATTTACTCCGTCTCCGGCT-3'   |                                                                 |
| <b><i>FGFR2</i></b> |                                | NM_000141.4, NM_022970.3, NM_001144913.1, NM_023029.2           |
| Forward             | 5' -CATCGCATTGGAGGCTACAAG-3'   | NM_001144914.1, NM_001144915.1, NM_001144916.1,                 |
| Reverse             | 5' -GGGACCACACTTTCCATAATGAG-3' | NM_001144917.1, NM_001144918.1, NM_001144919.1.                 |
| <b><i>GAPDH</i></b> |                                | NM_002046.5, NM_001256799.2                                     |
| Forward             | 5' -ATGGAAATCCCATCACCATCTT-3'  |                                                                 |
| Reverse             | 5' -CAGCATCGCCCCACTTG-3'       |                                                                 |
| <b><i>GAS1</i></b>  |                                | NM_002048.2                                                     |
| Forward             | 5' -CAGATTGTGCCAGTGAGGA-3'     |                                                                 |
| Reverse             | 5' -TCTGGGCCGCAGATACAAACA-3'   |                                                                 |
| <b><i>IL6</i></b>   |                                | NM_000600.4, NM_001318095.1                                     |
| Forward             | 5' -GAGTAGTGAGGAACAAGCCAG-3'   |                                                                 |
| Reverse             | 5' -GTCAGGGGTGGTTATTGCATC-3'   |                                                                 |
| <b><i>IL11</i></b>  |                                | NM_000641.3, NM_001267718.1                                     |
| Forward             | 5' -GGGACCACAACCTGGATTC-3'     |                                                                 |
| Reverse             | 5' -CGCAGGTAGGACAGTAGGT-3'     |                                                                 |
| <b><i>NR4A1</i></b> |                                | NM_002135.4, NM_173157.2, NM_001202233.1, NM_001202234.1        |
| Forward             | 5' -GCATGGTGAAGGAAGTTGTCCG-3'  |                                                                 |
| Reverse             | 5' -GGGGCTGCTTGGGTTTTGAA-3'    |                                                                 |
| <b><i>NR4A2</i></b> |                                | NM_006186.3                                                     |
| Forward             | 5' -GGCCCATGTCGACTCCAA-3'      |                                                                 |
| Reverse             | 5' -GTCAGGGTTCGCCTGGAA-3'      |                                                                 |
| <b><i>NR4A3</i></b> |                                | NM_006981.3, NM_173200.2, NM_173199.2                           |
| Forward             | 5' -GTAGACAAGAGACGTCGAAACC-3'  |                                                                 |
| Reverse             | 5' -CCTCTCCTCCCTTTCAGACTAT-3'  |                                                                 |
| <b><i>PDE4D</i></b> |                                | NM_006203.4, NM_001104631.1, NM_001165899.1, NM_001197218.1,    |
| Forward             | 5' -CTCTCTGAAATGAGTCGGTCTG-3'  | NM_001197219.1, NM_001197220.1, NM_001197221.1, NM_001197222.1, |
| Reverse             | 5' -CCTTCTGAGTTGGAGAAGGAAT-3'  | NM_001197223.1                                                  |

| <b>Gene</b>           | <b>Oligonucleotides</b>            | <b>Accession Number(s)</b>                                                                                                                                                                                                  |
|-----------------------|------------------------------------|-----------------------------------------------------------------------------------------------------------------------------------------------------------------------------------------------------------------------------|
| <b><i>PDK4</i></b>    |                                    | NM_002612.3                                                                                                                                                                                                                 |
| Forward               | 5' -GCTGTCCATGAAGCAGCTACTG-3'      |                                                                                                                                                                                                                             |
| Reverse               | 5' -CGCAAAAATGCAAAAGAAGTTCT-3'     |                                                                                                                                                                                                                             |
| <b><i>PPP1R3C</i></b> |                                    | NM_005398.6                                                                                                                                                                                                                 |
| Forward               | 5' -CCTAATGAGCTGCACCAGAATG-3'      |                                                                                                                                                                                                                             |
| Reverse               | 5' -TCACAGGTGGTGAATGTGCC-3'        |                                                                                                                                                                                                                             |
| <b><i>RGS2</i></b>    |                                    | NM_002923                                                                                                                                                                                                                   |
| Forward               | 5' -CCTCAAAGCAAGGAAAATATATACTGA-3' |                                                                                                                                                                                                                             |
| Reverse               | 5' -AGTTGTAAAGCAGCCACTTGTAGCT-3'   |                                                                                                                                                                                                                             |
| <b><i>RIMKLB</i></b>  |                                    | NM_001352269.1, NM_001352270.1, NM_001352267.1, NM_001352271.1, NM_020734.4, NM_001352268.1, NM_001297776.1, XM_017019690.1, XM_017019683.1, XM_017019684.1, XM_017019685.1, XM_017019686.1, XM_017019687.1, XM_017019688.1 |
| Forward               | 5' -GCGGGGTCACAGAGGTAAG-3'         |                                                                                                                                                                                                                             |
| Reverse               | 5' -GGAACAGGTATGGCGCTTCA-3'        |                                                                                                                                                                                                                             |
| <b><i>SGKI</i></b>    |                                    | NM_001291995.1, NM_001143676.1, NM_001143677.1, NM_001143678.1, NM_005627.3, XM_011536071.1                                                                                                                                 |
| Forward               | 5' -ATGGCCTGCCGCTTTTTAT-3'         |                                                                                                                                                                                                                             |
| Reverse               | 5' -CAGGAGGTGTCTTGCGGAAT-3'        |                                                                                                                                                                                                                             |
| <b><i>SLC7A2</i></b>  |                                    | NM_001164771.1, NM_001008539.3, NM_003046.5, XM_017013747.1, XM_005273610.4, XM_005273611.4, XM_005273612.4                                                                                                                 |
| Forward               | 5' -GGATTCCTAGCTTTCCTCGTG-3'       |                                                                                                                                                                                                                             |
| Reverse               | 5' -GCCTGGTGATGGCATGAACT-3'        |                                                                                                                                                                                                                             |
| <b><i>SMOC1</i></b>   |                                    | NM_022137.5, NM_001034852.2, XM_005267995.1, XM_005267996.1                                                                                                                                                                 |
| Forward               | 5' -GGCGTTTCACCGACTACTGT-3'        |                                                                                                                                                                                                                             |
| Reverse               | 5' -AGGCGTCCTACTTCTTTGCT-3'        |                                                                                                                                                                                                                             |
| <b><i>SOCS3</i></b>   |                                    | NM_003955.3                                                                                                                                                                                                                 |
| Forward               | 5' -GATTCTCCTTCAATTCCTCAGCTT-3'    |                                                                                                                                                                                                                             |
| Reverse               | 5' -ATTAGTTCAGCATTCCCGAAGTGT-3'    |                                                                                                                                                                                                                             |
| <b><i>STEAP4</i></b>  |                                    | NM_001205316.1, NM_001205315.1, NM_024636.3                                                                                                                                                                                 |
| Forward               | 5' -GTTCCGATTTGTCCAGTCCA-3'        |                                                                                                                                                                                                                             |
| Reverse               | 5' -GGCTGAGGAATCTCTTCCCAC-3'       |                                                                                                                                                                                                                             |
| <b><i>TXNIP</i></b>   |                                    | NM_006472.5, XM_017000085.1                                                                                                                                                                                                 |
| Forward               | 5' -AGACCAGCCAACAGGTGAGA-3'        |                                                                                                                                                                                                                             |
| Reverse               | 5' -AGGAAGCTCAAAGCCGAACT-3'        |                                                                                                                                                                                                                             |



**Supplemental TABLE 3.** Indacaterol-induced transcripts with expression level changes >1.5-fold (*FDR* < 0.10) at 1h, 2h, 6h and 18h.

|                                                          |                |                      |                 |              |                                                                                  | Transcriptional Regulators | Transporters, Ion Channels and Membrane Receptors | Metabolic Proteins | General Signalling Molecules, including Translational Regulators | Other Functions | Not Assigned |
|----------------------------------------------------------|----------------|----------------------|-----------------|--------------|----------------------------------------------------------------------------------|----------------------------|---------------------------------------------------|--------------------|------------------------------------------------------------------|-----------------|--------------|
| <b>Indacaterol (1h)</b>                                  |                |                      |                 |              |                                                                                  |                            |                                                   |                    |                                                                  |                 |              |
| <b>(173 Probe Sets <math>\equiv</math> 134 Gene IDs)</b> |                |                      |                 |              |                                                                                  |                            |                                                   |                    |                                                                  |                 |              |
| Affy Probe Set ID*                                       | Entrez Gene ID | Official Gene Symbol | FDR P-Value     | Fold change  | UniGene Name                                                                     | Function                   |                                                   |                    |                                                                  |                 |              |
| 204621_s_at                                              | 4929           | <b>NR4A2</b>         | <b>2.10E-03</b> | <b>25.34</b> | <b>nuclear receptor subfamily 4, group A, member 2</b>                           |                            |                                                   |                    |                                                                  |                 |              |
| 207978_s_at                                              | 8013           | NR4A3                | 2.40E-03        | 21.95        | nuclear receptor subfamily 4, group A, member 3                                  |                            |                                                   |                    |                                                                  |                 |              |
| 216248_s_at                                              | 4929           | <b>NR4A2</b>         | <b>1.40E-03</b> | <b>21.76</b> | <b>nuclear receptor subfamily 4, group A, member 2</b>                           |                            |                                                   |                    |                                                                  |                 |              |
| 204622_x_at                                              | 4929           | <b>NR4A2</b>         | <b>1.60E-03</b> | <b>20.56</b> | <b>nuclear receptor subfamily 4, group A, member 2</b>                           |                            |                                                   |                    |                                                                  |                 |              |
| 209959_at                                                | 8013           | NR4A3                | 2.80E-03        | 18.20        | nuclear receptor subfamily 4, group A, member 3                                  |                            |                                                   |                    |                                                                  |                 |              |
| 205207_at                                                | 3569           | IL6                  | 5.78E-05        | 11.20        | interleukin 6                                                                    |                            |                                                   |                    |                                                                  |                 |              |
| 205476_at                                                | 6364           | CCL20                | 1.93E-02        | 7.04         | chemokine (C-C motif) ligand 20                                                  |                            |                                                   |                    |                                                                  |                 |              |
| 239145_at                                                | 84330          | ZNF414               | 1.00E-01        | 6.62         | zinc finger protein 414                                                          |                            |                                                   |                    |                                                                  |                 |              |
| 228964_at                                                | 639            | PRDM1                | 5.78E-05        | 6.48         | PR domain containing 1, with ZNF domain                                          |                            |                                                   |                    |                                                                  |                 |              |
| 208078_s_at                                              | 150094         | SIK1                 | 2.00E-04        | 5.07         | salt-inducible kinase 1                                                          |                            |                                                   |                    |                                                                  |                 |              |
|                                                          | 102724428      | LOC102724428         |                 |              | serine/threonine-protein kinase SIK1                                             |                            |                                                   |                    |                                                                  |                 |              |
| 209774_x_at                                              | 2920           | CXCL2                | 5.78E-05        | 4.91         | chemokine (C-X-C motif) ligand 2                                                 |                            |                                                   |                    |                                                                  |                 |              |
| 233972_s_at                                              | 55079          | FEZF2                | 8.52E-02        | 4.90         | FEZ family zinc finger 2                                                         |                            |                                                   |                    |                                                                  |                 |              |
| 239818_x_at                                              | 10221          | TRIB1                | 5.00E-04        | 4.71         | tribbles pseudokinase 1                                                          |                            |                                                   |                    |                                                                  |                 |              |
| 232470_at                                                | 150094         | SIK1                 | 3.00E-04        | 4.65         | salt-inducible kinase 1                                                          |                            |                                                   |                    |                                                                  |                 |              |
|                                                          | 102724428      | LOC102724428         |                 |              | serine/threonine-protein kinase SIK1                                             |                            |                                                   |                    |                                                                  |                 |              |
| 238378_at                                                | 285513         | GPRIN3               | 1.10E-02        | 4.48         | GPRIN family member 3                                                            |                            |                                                   |                    |                                                                  |                 |              |
| 202241_at                                                | 10221          | TRIB1                | 5.78E-05        | 4.46         | tribbles pseudokinase 1                                                          |                            |                                                   |                    |                                                                  |                 |              |
| 201739_at                                                | 6446           | <b>SGK1</b>          | <b>1.00E-04</b> | <b>4.42</b>  | <b>serum/glucocorticoid regulated kinase 1</b>                                   |                            |                                                   |                    |                                                                  |                 |              |
| 205960_at                                                | 5166           | <b>PDK4</b>          | <b>1.00E-04</b> | <b>4.41</b>  | <b>pyruvate dehydrogenase kinase, isozyme 4</b>                                  |                            |                                                   |                    |                                                                  |                 |              |
| 202388_at                                                | 5997           | <b>RGS2</b>          | <b>6.58E-05</b> | <b>4.33</b>  | <b>regulator of G-protein signaling 2</b>                                        |                            |                                                   |                    |                                                                  |                 |              |
| 1557285_at                                               | 374            | AREG                 | 1.88E-02        | 3.79         | amphiregulin                                                                     |                            |                                                   |                    |                                                                  |                 |              |
| 225207_at                                                | 5166           | <b>PDK4</b>          | <b>2.90E-03</b> | <b>3.78</b>  | <b>pyruvate dehydrogenase kinase, isozyme 4</b>                                  |                            |                                                   |                    |                                                                  |                 |              |
| 218995_s_at                                              | 1906           | EDN1                 | 2.00E-04        | 3.63         | endothelin 1                                                                     |                            |                                                   |                    |                                                                  |                 |              |
| 201044_x_at                                              | 1843           | <b>DUSP1</b>         | <b>2.00E-04</b> | <b>3.49</b>  | <b>dual specificity phosphatase 1</b>                                            |                            |                                                   |                    |                                                                  |                 |              |
| 222802_at                                                | 1906           | EDN1                 | 2.00E-04        | 3.47         | endothelin 1                                                                     |                            |                                                   |                    |                                                                  |                 |              |
| 1555585_a_at                                             | 153745         | FAM71B               | 8.10E-03        | 3.42         | family with sequence similarity 71, member 8                                     |                            |                                                   |                    |                                                                  |                 |              |
| 227613_at                                                | 55422          | ZNF331               | 2.60E-03        | 3.39         | zinc finger protein 331                                                          |                            |                                                   |                    |                                                                  |                 |              |
| 201169_s_at                                              | 8553           | BHLHE40              | 2.00E-04        | 3.37         | basic helix-loop-helix family, member e40                                        |                            |                                                   |                    |                                                                  |                 |              |
| 202340_x_at                                              | 3164           | NR4A1                | 3.40E-03        | 3.35         | nuclear receptor subfamily 4, group A, member 1                                  |                            |                                                   |                    |                                                                  |                 |              |
| 211143_x_at                                              | 3164           | NR4A1                | 1.30E-03        | 3.28         | nuclear receptor subfamily 4, group A, member 1                                  |                            |                                                   |                    |                                                                  |                 |              |
| 213139_at                                                | 6591           | SNAI2                | 6.58E-05        | 3.24         | snail family zinc finger 2                                                       |                            |                                                   |                    |                                                                  |                 |              |
| 219228_at                                                | 55422          | ZNF331               | 3.40E-03        | 3.22         | zinc finger protein 331                                                          |                            |                                                   |                    |                                                                  |                 |              |
| 244025_at                                                | 85450          | ITPRIP               | 6.00E-04        | 3.17         | inositol 1,4,5-trisphosphate receptor interacting protein                        |                            |                                                   |                    |                                                                  |                 |              |
| 201170_s_at                                              | 8553           | BHLHE40              | 7.07E-05        | 3.07         | basic helix-loop-helix family, member e40                                        |                            |                                                   |                    |                                                                  |                 |              |
| 224797_at                                                | 57561          | ARRDC3               | 9.10E-03        | 2.88         | arrestin domain containing 3                                                     |                            |                                                   |                    |                                                                  |                 |              |
| 205764_at                                                | 1452           | CSNK1A1              | 2.51E-02        | 2.78         | casein kinase 1, alpha 1                                                         |                            |                                                   |                    |                                                                  |                 |              |
| 203395_s_at                                              | 3280           | HES1                 | 1.40E-02        | 2.77         | hes family bHLH transcription factor 1                                           |                            |                                                   |                    |                                                                  |                 |              |
| 221841_s_at                                              | 9314           | KLFA4                | 3.50E-03        | 2.75         | Kruppel-like factor 4 (gut)                                                      |                            |                                                   |                    |                                                                  |                 |              |
| 225582_at                                                | 85450          | ITPRIP               | 3.00E-04        | 2.66         | inositol 1,4,5-trisphosphate receptor interacting protein                        |                            |                                                   |                    |                                                                  |                 |              |
| 203394_s_at                                              | 3280           | HES1                 | 4.70E-03        | 2.65         | hes family bHLH transcription factor 1                                           |                            |                                                   |                    |                                                                  |                 |              |
| 239530_at                                                | 119            | ADD2                 | 6.44E-02        | 2.64         | adducin 2 (beta)                                                                 |                            |                                                   |                    |                                                                  |                 |              |
| 238987_at                                                | 2683           | B4GALT1              | 1.16E-02        | 2.48         | UDP-Gal:betaGlcNAc beta 1,4-galactosyltransferase, polypeptide 1                 |                            |                                                   |                    |                                                                  |                 |              |
| 205239_at                                                | 374            | AREG                 | 1.76E-02        | 2.41         | amphiregulin                                                                     |                            |                                                   |                    |                                                                  |                 |              |
| 240413_at                                                | 149628         | PYHIN1               | 2.32E-02        | 2.38         | pyrin and HIN domain family, member 1                                            |                            |                                                   |                    |                                                                  |                 |              |
| 203313_s_at                                              | 7050           | TGIF1                | 7.00E-04        | 2.37         | TGF $\beta$ -induced factor homeobox 1                                           |                            |                                                   |                    |                                                                  |                 |              |
| 210632_s_at                                              | 6442           | SGCA                 | 9.68E-02        | 2.35         | sarcoglycan alpha                                                                |                            |                                                   |                    |                                                                  |                 |              |
| 227337_at                                                | 353322         | ANKRD37              | 7.00E-03        | 2.34         | ankyrin repeat domain 37                                                         |                            |                                                   |                    |                                                                  |                 |              |
| 220088_at                                                | 728            | <b>CSAR1</b>         | <b>2.60E-03</b> | <b>2.30</b>  | <b>complement component 5a receptor 1</b>                                        |                            |                                                   |                    |                                                                  |                 |              |
| 36711_at                                                 | 23764          | MAFF                 | 4.70E-03        | 2.29         | v-maf avian musculoaponeurotic fibrosarcoma oncogene homolog F                   |                            |                                                   |                    |                                                                  |                 |              |
| 205290_s_at                                              | 650            | BMP2                 | 7.04E-02        | 2.27         | bone morphogenetic protein 2                                                     |                            |                                                   |                    |                                                                  |                 |              |
| 1559987_at                                               | 124540         | MSI2                 | 8.27E-02        | 2.27         | musashi RNA binding protein 2                                                    |                            |                                                   |                    |                                                                  |                 |              |
| 201939_at                                                | 10769          | PLK2                 | 2.60E-03        | 2.23         | polo-like kinase 2                                                               |                            |                                                   |                    |                                                                  |                 |              |
| 209582_s_at                                              | 4345           | <b>CD200</b>         | <b>6.90E-03</b> | <b>2.21</b>  | <b>CD200 molecule</b>                                                            |                            |                                                   |                    |                                                                  |                 |              |
| 1566901_at                                               | 7050           | TGIF1                | 3.12E-02        | 2.21         | TGF $\beta$ induced factor homeobox 1                                            |                            |                                                   |                    |                                                                  |                 |              |
| 202935_s_at                                              | 6662           | SOX9                 | 9.00E-04        | 2.19         | SRY box 9                                                                        |                            |                                                   |                    |                                                                  |                 |              |
| 242543_at                                                | 284948         | SH2D6                | 8.83E-02        | 2.19         | SH2 domain containing 6                                                          |                            |                                                   |                    |                                                                  |                 |              |
| 205193_at                                                | 23764          | MAFF                 | 1.49E-02        | 2.17         | v-maf avian musculoaponeurotic fibrosarcoma oncogene homolog F                   |                            |                                                   |                    |                                                                  |                 |              |
| 229152_at                                                | 260436         | FDL3                 | 4.70E-02        | 2.17         | follicular dendritic cell secreted protein                                       |                            |                                                   |                    |                                                                  |                 |              |
| 1555118_at                                               | 956            | ENTPD3               | 7.24E-02        | 2.15         | ectonucleoside triphosphate diphosphohydrolase 3                                 |                            |                                                   |                    |                                                                  |                 |              |
| 209583_s_at                                              | 4345           | <b>CD200</b>         | <b>5.00E-04</b> | <b>2.12</b>  | <b>CD200 molecule</b>                                                            |                            |                                                   |                    |                                                                  |                 |              |
| 204011_at                                                | 10253          | SPRY2                | 8.00E-04        | 2.11         | sprouty RTK signaling antagonist 2                                               |                            |                                                   |                    |                                                                  |                 |              |
| 204491_at                                                | 5144           | <b>PDE4D</b>         | <b>1.67E-02</b> | <b>2.11</b>  | <b>phosphodiesterase 4D, cAMP-specific</b>                                       |                            |                                                   |                    |                                                                  |                 |              |
| 239367_at                                                | 627            | BDNF                 | 1.30E-03        | 2.10         | brain-derived neurotrophic factor                                                |                            |                                                   |                    |                                                                  |                 |              |
| 220125_at                                                | 27019          | DNAI1                | 5.65E-02        | 2.10         | dynein, axonemal, intermediate chain 1                                           |                            |                                                   |                    |                                                                  |                 |              |
| 228962_at                                                | 5144           | <b>PDE4D</b>         | <b>2.49E-02</b> | <b>2.06</b>  | <b>phosphodiesterase 4D, cAMP-specific</b>                                       |                            |                                                   |                    |                                                                  |                 |              |
| 204456_s_at                                              | 2619           | <b>GAS1</b>          | <b>3.50E-02</b> | <b>2.05</b>  | <b>growth arrest-specific 1</b>                                                  |                            |                                                   |                    |                                                                  |                 |              |
| 205466_s_at                                              | 9957           | HS3ST1               | 2.92E-02        | 2.04         | heparan sulfate (glucosamine) 3-O-sulfotransferase 1                             |                            |                                                   |                    |                                                                  |                 |              |
| 203574_at                                                | 4783           | NFIL3                | 1.33E-02        | 2.02         | nuclear factor, interleukin 3 regulated                                          |                            |                                                   |                    |                                                                  |                 |              |
| 218177_at                                                | 57132          | CHMP1B               | 1.63E-02        | 2.02         | charged multivesicular body protein 1B                                           |                            |                                                   |                    |                                                                  |                 |              |
| 209457_at                                                | 1847           | DUSP5                | 2.00E-03        | 2.01         | dual specificity phosphatase 5                                                   |                            |                                                   |                    |                                                                  |                 |              |
| 216604_s_at                                              | 23428          | SLC7A8               | 6.90E-03        | 2.01         | solute carrier family 7 (amino acid transporter light chain, L system), member 8 |                            |                                                   |                    |                                                                  |                 |              |
| 212977_at                                                | 57007          | ACKR3                | 2.20E-03        | 1.99         | atypical chemokine receptor 3                                                    |                            |                                                   |                    |                                                                  |                 |              |
| 205027_s_at                                              | 1326           | MAP3K8               | 2.29E-02        | 1.99         | mitogen-activated protein kinase kinase 8                                        |                            |                                                   |                    |                                                                  |                 |              |
| 206758_at                                                | 1907           | EDN2                 | 1.88E-02        | 1.98         | endothelin 2                                                                     |                            |                                                   |                    |                                                                  |                 |              |
| 206382_s_at                                              | 627            | BDNF                 | 3.60E-03        | 1.97         | brain-derived neurotrophic factor                                                |                            |                                                   |                    |                                                                  |                 |              |
| 230748_at                                                | 9120           | SLC16A6              | 2.20E-02        | 1.96         | solute carrier family 16, member 6                                               |                            |                                                   |                    |                                                                  |                 |              |
| 207826_s_at                                              | 3399           | ID3                  | 5.10E-03        | 1.95         | inhibitor of DNA binding 3, dominant negative helix-loop-helix protein           |                            |                                                   |                    |                                                                  |                 |              |
| 206706_at                                                | 4908           | NTF3                 | 8.00E-04        | 1.94         | neurotrophin 3                                                                   |                            |                                                   |                    |                                                                  |                 |              |
| 218631_at                                                | 60370          | AVP11                | 9.00E-04        | 1.93         | arginine vasopressin-induced 1                                                   |                            |                                                   |                    |                                                                  |                 |              |
| 218178_s_at                                              | 57132          | CHMP1B               | 1.80E-03        | 1.93         | charged multivesicular body protein 1B                                           |                            |                                                   |                    |                                                                  |                 |              |
| 202936_s_at                                              | 6662           | SOX9                 | 1.90E-03        | 1.93         | SRY box 9                                                                        |                            |                                                   |                    |                                                                  |                 |              |

|                    |             |              |                 |             |                                                                                               |  |
|--------------------|-------------|--------------|-----------------|-------------|-----------------------------------------------------------------------------------------------|--|
| 236385_at          | 1139        | CHRFAM7A     | 3.12E-02        |             | CHRNA7 (Exons 5-10) And FAM7A (Exons A-E) Fusion                                              |  |
|                    | 89832       | CHRNA7       | 3.12E-02        | 1.93        | cholinergic receptor, nicotinic alpha 7                                                       |  |
|                    | 101929970   | LOC101929970 | 3.12E-02        |             | CHRNA7-FAM7A fusion protein                                                                   |  |
| 229110_at          | 25769       | SLC24A2      | 5.09E-02        | 1.93        | solute carrier family 24 (sodium/potassium/calcium exchanger), member 2                       |  |
| 202672_s_at        | 467         | ATF3         | 5.76E-02        | 1.93        | activating transcription factor 3                                                             |  |
| 208937_s_at        | 3397        | ID1          | 1.21E-02        | 1.91        | inhibitor of DNA binding 1, dominant negative helix-loop-helix protein                        |  |
| 218810_at          | 80149       | ZC3H12A      | 9.20E-03        | 1.90        | zinc finger CCCH-type containing 12A                                                          |  |
| 208960_s_at        | 1316        | KLF6         | 6.00E-04        | 1.88        | Kruppel-like factor 6                                                                         |  |
| 202023_s_at        | 1942        | EFNA1        | 3.00E-04        | 1.86        | ephrin-A1                                                                                     |  |
| 215111_s_at        | 8848        | TSC22D1      | 1.03E-02        | 1.85        | TSC22 domain family, member 1                                                                 |  |
| 218723_s_at        | 28984       | RGCC         | 1.33E-02        | 1.85        | regulator of cell cycle                                                                       |  |
| 239058_at          | 2303        | FOXC2        | 1.49E-02        | 1.85        | forkhead box C2                                                                               |  |
| 232746_at          | 57007       | ACKR3        | 4.43E-02        | 1.84        | atypical chemokine receptor 3                                                                 |  |
| 225557_at          | 64651       | CSRN1P1      | 2.20E-03        | 1.83        | cysteine-serine-rich nuclear protein 1                                                        |  |
| 207850_at          | 2921        | CXCL3        | 9.80E-03        | 1.83        | chemokine (C-X-C motif) ligand 3                                                              |  |
| 234583_at          | 10752       | CHL1         | 6.34E-02        | 1.83        | cell adhesion molecule L1-like                                                                |  |
| 1552948_at         | 148870      | CCDC27       | 9.80E-03        | 1.82        | coiled-coil domain containing 27                                                              |  |
| 220987_s_at        | 56672       | AKIP1        | 2.00E-03        | 1.81        | A kinase (PRKA) interacting protein 1                                                         |  |
|                    | 81788       | NUAK2        | 2.00E-03        | 1.81        | NUAK family, SNF1-like kinase, 2                                                              |  |
| 202149_at          | 4739        | NEDD9        | 8.40E-03        | 1.81        | neural precursor cell expressed, developmentally down-regulated 9                             |  |
| 202431_s_at        | 4609        | MYC          | 6.00E-04        | 1.80        | v-myc avian myelocytomatosis viral oncogene homolog                                           |  |
| 220266_s_at        | 9314        | KLF4         | 4.10E-02        | 1.80        | Kruppel-like factor 4 (gut)                                                                   |  |
| 205815_at          | 5068        | REG3A        | 8.98E-02        | 1.79        | regenerating islet-derived 3 alpha                                                            |  |
| 202499_s_at        | 6515        | SLC2A3       | 3.34E-02        | 1.78        | solute carrier family 2 (facilitated glucose transporter), member 3                           |  |
| 204014_at          | 1846        | DUSP4        | 1.20E-02        | 1.77        | dual specificity phosphatase 4                                                                |  |
| <b>210836_x_at</b> | <b>5144</b> | <b>PDE4D</b> | <b>1.90E-02</b> | <b>1.77</b> | <b>phosphodiesterase 4D, cAMP-specific</b>                                                    |  |
| 1555832_s_at       | 1316        | KLF6         | 1.40E-03        | 1.76        | Kruppel-like factor 6                                                                         |  |
| 203708_at          | 5142        | PDE4B        | 1.96E-02        | 1.76        | phosphodiesterase 4B, cAMP-specific                                                           |  |
| 226034_at          | 1846        | DUSP4        | 6.90E-03        | 1.75        | dual specificity phosphatase 4                                                                |  |
| 230472_at          | 79192       | IRX1         | 6.90E-03        | 1.75        | iroquois homeobox 1                                                                           |  |
| 202150_s_at        | 4739        | NEDD9        | 2.18E-02        | 1.74        | neural precursor cell expressed, developmentally down-regulated 9                             |  |
| 231035_s_at        | 220213      | OTUD1        | 3.90E-02        | 1.74        | OTU deubiquitinase 1                                                                          |  |
| 211962_s_at        | 677         | ZFP36L1      | 9.92E-02        | 1.73        | ZFP36 ring finger protein-like 1                                                              |  |
| 235849_at          | 286133      | SCARA5       | 6.63E-02        | 1.71        | scavenger receptor class A, member 5                                                          |  |
| 1553422_s_at       | 54715       | RBFOX1       | 5.93E-02        | 1.70        | RNA binding protein, fox-1 homolog (C. elegans) 1                                             |  |
| 1553613_s_at       | 2296        | FOXO1        | 1.60E-03        | 1.69        | forkhead box C1                                                                               |  |
| 233379_at          | 79899       | PRR5L        | 8.33E-02        | 1.69        | proline rich 5 like                                                                           |  |
| 1554980_a_at       | 467         | ATF3         | 1.80E-02        | 1.68        | activating transcription factor 3                                                             |  |
| 215990_s_at        | 604         | BCL6         | 1.90E-02        | 1.68        | B-cell CLL/lymphoma 6                                                                         |  |
| 222162_s_at        | 9510        | ADAMTS1      | 2.20E-02        | 1.68        | ADAM metalloproteinase with thrombospondin type 1 motif 1                                     |  |
| 202497_x_at        | 6515        | SLC2A3       | 2.97E-02        | 1.68        | solute carrier family 2 (facilitated glucose transporter), member 3                           |  |
|                    | 6515        | SLC2A14      | 2.98E-02        |             | solute carrier family 2 (facilitated glucose transporter), member 14                          |  |
| 216236_s_at        | 144195      | SLC2A3       | 2.98E-02        | 1.68        | solute carrier family 2 (facilitated glucose transporter), member 3                           |  |
| 213170_at          | 2882        | GPX7         | 4.29E-02        |             | glutathione peroxidase 7                                                                      |  |
| 224606_at          | 1316        | KLF6         | 2.30E-03        | 1.67        | Kruppel-like factor 6                                                                         |  |
| 203140_at          | 604         | BCL6         | 2.60E-03        | 1.67        | B-cell CLL/lymphoma 6                                                                         |  |
| 207981_s_at        | 2104        | ESRRG        | 4.29E-02        | 1.67        | estrogen-related receptor gamma                                                               |  |
| 213284_at          | 677         | ZFP36L1      | 5.24E-02        | 1.66        | ZFP36 ring finger protein-like 1                                                              |  |
| 224657_at          | 54206       | ERRFI1       | 1.45E-02        | 1.65        | ERBB receptor feedback inhibitor 1                                                            |  |
| 204931_at          | 6943        | TCF21        | 1.88E-02        | 1.65        | transcription factor 21                                                                       |  |
| 204284_at          | 5507        | PPP1R3C      | 5.76E-02        | 1.65        | protein phosphatase 1, regulatory subunit 3C                                                  |  |
| <b>201041_s_at</b> | <b>1843</b> | <b>DUSP1</b> | <b>6.00E-04</b> | <b>1.64</b> | <b>dual specificity phosphatase 1</b>                                                         |  |
| 221766_s_at        | 55603       | FAM46A       | 5.09E-02        | 1.64        | family with sequence similarity 46, member A                                                  |  |
| 227443_at          | 286343      | LURAP1L      | 7.04E-02        | 1.64        | leucine rich adaptor protein 1-like                                                           |  |
| 229373_at          | 3274        | HRH2         | 1.63E-02        | 1.63        | histamine receptor H2                                                                         |  |
|                    | 6515        | SLC2A14      | 6.27E-02        | 1.63        | solute carrier family 2 (facilitated glucose transporter), member 14                          |  |
| 222088_s_at        | 144195      | SLC2A3       | 6.27E-02        | 1.63        | solute carrier family 2 (facilitated glucose transporter), member 3                           |  |
| 205929_at          | 10223       | GPA33        | 6.88E-02        | 1.62        | glycoprotein A33 (transmembrane)                                                              |  |
| 1554420_at         | 467         | ATF3         | 9.65E-02        | 1.62        | activating transcription factor 3                                                             |  |
| 222379_at          | 23704       | KCNE4        | 1.88E-02        | 1.61        | potassium channel, voltage gated subfamily E regulatory beta subunit 4                        |  |
| 219371_s_at        | 10365       | KLF2         | 4.72E-02        | 1.61        | Kruppel-like factor 2                                                                         |  |
| 225720_at          | 171024      | SYNPO2       | 8.98E-02        | 1.61        | synaptopodin 2                                                                                |  |
| 208961_s_at        | 1316        | KLF6         | 1.80E-03        | 1.60        | Kruppel-like factor 6                                                                         |  |
| 225606_at          | 10018       | BCL2L11      | 2.32E-02        | 1.60        | BCL2-like 11 (apoptosis facilitator)                                                          |  |
| 1553378_a_at       | 256957      | HEATR9       | 5.39E-02        | 1.60        | HEAT repeat containing 9                                                                      |  |
| 234928_x_at        | 864         | RUNX3        | 6.63E-02        | 1.60        | runx-related transcription factor 3                                                           |  |
| 206374_at          | 1850        | DUSP8        | 2.31E-02        | 1.59        | dual specificity phosphatase 8                                                                |  |
| 1431_at            | 1571        | CYP2E1       | 1.67E-02        | 1.58        | cytochrome P450, family 2, subfamily E, polypeptide 1                                         |  |
| 218880_at          | 2355        | FOSL2        | 4.79E-02        | 1.58        | FOS-like antigen 2                                                                            |  |
| 211302_s_at        | 5142        | PDE4B        | 8.43E-02        | 1.58        | phosphodiesterase 4B, cAMP-specific                                                           |  |
| 239381_at          | 5650        | KLK7         | 9.47E-02        | 1.58        | kallikrein related peptidase 7                                                                |  |
| 203438_at          | 8614        | STC2         | 1.63E-02        | 1.57        | stanniocalcin 2                                                                               |  |
| 226140_s_at        | 220213      | OTUD1        | 8.90E-03        | 1.56        | OTU deubiquitinase 1                                                                          |  |
| 229552_at          | 8739        | HRK          | 8.49E-02        | 1.56        | harakiri, BCL2 interacting protein                                                            |  |
|                    | 283454      | LOC283454    | 8.49E-02        | 1.56        | uncharacterized LOC283454                                                                     |  |
| 201328_at          | 2114        | ETS2         | 7.00E-03        | 1.55        | v-ets avian erythroblastosis virus E26 oncogene homolog 2                                     |  |
| 228325_at          | 23514       | SPIDR        | 1.03E-02        | 1.55        | scaffolding protein involved in DNA repair                                                    |  |
| 228462_at          | 153572      | IRX2         | 1.33E-02        | 1.55        | iroquois homeobox 2                                                                           |  |
| 212143_s_at        | 3486        | IGFBP3       | 3.90E-02        | 1.55        | insulin like growth factor binding protein 3                                                  |  |
| 228188_at          | 2355        | FOSL2        | 8.83E-02        | 1.55        | FOS-like antigen 2                                                                            |  |
| 230493_at          | 387914      | SHISA2       | 8.30E-03        | 1.54        | shisa family member 2                                                                         |  |
| 207980_s_at        | 10370       | CITED2       | 1.11E-02        | 1.54        | Cbp/p300-interacting transactivator, with Glu/Asp rich carboxy-terminal domain, 2             |  |
| 212230_at          | 8613        | PLPP3        | 3.27E-02        | 1.54        | phospholipid phosphatase 3                                                                    |  |
| 202704_at          | 10140       | TOB1         | 5.18E-02        | 1.54        | transducer of ERBB2, 1                                                                        |  |
| 209101_at          | 1490        | CTGF         | 5.89E-02        | 1.54        | connective tissue growth factor                                                               |  |
| 202628_s_at        | 5054        | SERPINE1     | 2.60E-03        | 1.53        | serpin peptidase inhibitor, clade E (nexin, plasminogen activator inhibitor type 1), member 1 |  |
| 203973_s_at        | 1052        | CEBPD        | 7.00E-03        | 1.53        | CCAAT/enhancer binding protein (C/EBP), delta                                                 |  |
| 231958_at          | 132001      | TAMM41       | 3.78E-02        | 1.53        | TAM41 mitochondrial translocator assembly and maintenance homolog                             |  |
| 228167_at          | 89857       | KLHL6        | 7.24E-02        | 1.53        | kelch-like family member 6                                                                    |  |
| 229800_at          | 9201        | DCLK1        | 1.63E-02        | 1.52        | doublecortin-like kinase 1                                                                    |  |
| 212226_s_at        | 8613        | PLPP3        | 1.72E-02        | 1.52        | phospholipid phosphatase 3                                                                    |  |
| 206999_at          | 3595        | IL12RB2      | 4.25E-02        | 1.52        | interleukin 12 receptor, beta 2                                                               |  |
| 206170_at          | 154         | ADRB2        | 1.63E-02        | 1.51        | adrenoceptor beta 2, surface                                                                  |  |
| 229004_at          | 170689      | ADAMTS15     | 1.88E-02        | 1.51        | ADAM metalloproteinase with thrombospondin type 1 motif 15                                    |  |

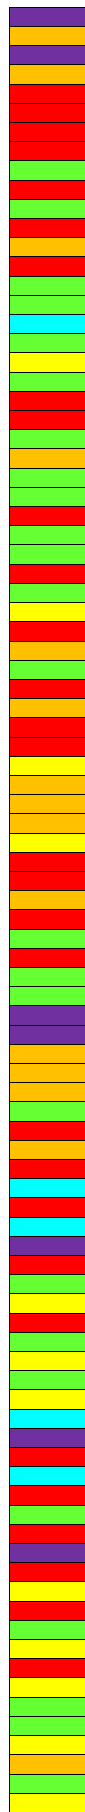

|             |        |                |          |      |                                            |  |
|-------------|--------|----------------|----------|------|--------------------------------------------|--|
| 230372_at   | 3037   | <i>HAS2</i>    | 2.25E-02 | 1.51 | hyaluronan synthase 2                      |  |
| 204015_s_at | 1846   | <i>DUSP4</i>   | 2.41E-02 | 1.51 | dual specificity phosphatase 4             |  |
| 230773_at   | 79750  | <i>ZNF385D</i> | 3.60E-02 | 1.51 | zinc finger protein 385D                   |  |
| 208293_x_at | 1444   | <i>CSHL1</i>   | 6.70E-02 | 1.51 | chorionic somatomammotropin hormone-like 1 |  |
| 235182_at   | 140862 | <i>ISM1</i>    | 9.00E-02 | 1.51 | isthmin 1, angiogenesis inhibitor          |  |

**Indacaterol (2h)**

(515 Probe Sets ≡ 321 Gene IDs)

| Affy Probe Set ID* | Entrez Gene ID | Official Gene Symbol | FDR P-Value | Fold change | UniGene Name                                                             | Function |
|--------------------|----------------|----------------------|-------------|-------------|--------------------------------------------------------------------------|----------|
| 209959_at          | 8013           | <i>NR4A3</i>         | 6.05E-05    | 66.19       | nuclear receptor subfamily 4, group A, member 3                          |          |
| 207978_s_at        | 8013           | <i>NR4A3</i>         | 4.57E-05    | 38.53       | nuclear receptor subfamily 4, group A, member 3                          |          |
| 216248_s_at        | 4929           | <i>NR4A2</i>         | 7.00E-04    | 28.71       | nuclear receptor subfamily 4, group A, member 2                          |          |
| 204622_x_at        | 4929           | <i>NR4A2</i>         | 2.00E-04    | 24.49       | nuclear receptor subfamily 4, group A, member 2                          |          |
| 204621_s_at        | 4929           | <i>NR4A2</i>         | 1.70E-03    | 24.45       | nuclear receptor subfamily 4, group A, member 2                          |          |
| 203639_s_at        | 2263           | <i>FGFR2</i>         | 1.51E-02    | 13.55       | fibroblast growth factor receptor 2                                      |          |
| 205289_at          | 650            | <i>BMP2</i>          | 1.45E-02    | 11.62       | bone morphogenetic protein 2                                             |          |
| 221541_at          | 83716          | <i>CRISPLD2</i>      | 5.25E-06    | 8.50        | cysteine-rich secretory protein LCCL domain containing 2                 |          |
| 225207_at          | 5166           | <i>PDK4</i>          | 1.00E-04    | 8.30        | pyruvate dehydrogenase kinase, isozyme 4                                 |          |
| 205476_at          | 6364           | <i>CCL20</i>         | 3.00E-04    | 7.94        | chemokine (C-C motif) ligand 20                                          |          |
| 205207_at          | 3569           | <i>IL6</i>           | 1.90E-03    | 7.75        | interleukin 6                                                            |          |
| 234511_at          | 140731         | <i>ANKRD60</i>       | 1.08E-01    | 7.53        | ankyrin repeat domain 60                                                 |          |
| 205960_at          | 5166           | <i>PDK4</i>          | 3.00E-03    | 6.74        | pyruvate dehydrogenase kinase, isozyme 4                                 |          |
|                    | 150094         | <i>SIK1</i>          | 2.00E-04    | 6.56        | salt-inducible kinase 1                                                  |          |
| 232470_at          | 102724428      | <i>LOC102724428</i>  |             |             | serine/threonine-protein kinase SIK1                                     |          |
|                    | 150094         | <i>SIK1</i>          | 1.11E-05    | 6.31        | salt-inducible kinase 1                                                  |          |
| 208078_s_at        | 102724428      | <i>LOC102724428</i>  |             |             | serine/threonine-protein kinase SIK1                                     |          |
| 218541_s_at        | 56892          | <i>C8orf4</i>        | 1.81E-02    | 6.12        | chromosome 8 open reading frame 4                                        |          |
| 228962_at          | 5144           | <i>PDE4D</i>         | 8.63E-05    | 6.12        | phosphodiesterase 4D, cAMP-specific                                      |          |
| 201739_at          | 6446           | <i>SGK1</i>          | 6.05E-05    | 5.78        | serum/glucocorticoid regulated kinase 1                                  |          |
| 206359_at          | 9021           | <i>SOCS3</i>         | 1.44E-02    | 5.73        | suppressor of cytokine signaling 3                                       |          |
| 209582_s_at        | 4345           | <i>CD200</i>         | 2.00E-04    | 5.71        | CD200 molecule                                                           |          |
| 203638_s_at        | 2263           | <i>FGFR2</i>         | 1.20E-03    | 5.67        | fibroblast growth factor receptor 2                                      |          |
| 228964_at          | 639            | <i>PRDM1</i>         | 1.11E-05    | 5.50        | PR domain containing 1, with ZNF domain                                  |          |
| 211401_s_at        | 2263           | <i>FGFR2</i>         | 5.23E-02    | 5.37        | fibroblast growth factor receptor 2                                      |          |
| 204491_at          | 5144           | <i>PDE4D</i>         | 5.15E-05    | 5.25        | phosphodiesterase 4D, cAMP-specific                                      |          |
| 227697_at          | 9021           | <i>SOCS3</i>         | 2.11E-02    | 5.04        | suppressor of cytokine signaling 3                                       |          |
| 225582_at          | 85450          | <i>ITPRIP</i>        | 1.35E-05    | 4.75        | inositol 1,4,5-trisphosphate receptor interacting protein                |          |
| 210837_s_at        | 5144           | <i>PDE4D</i>         | 2.00E-04    | 4.75        | phosphodiesterase 4D, cAMP-specific                                      |          |
| 202388_at          | 5997           | <i>RGS2</i>          | 9.78E-05    | 4.75        | regulator of G-protein signaling 2                                       |          |
| 210836_x_at        | 5144           | <i>PDE4D</i>         | 9.33E-05    | 4.52        | phosphodiesterase 4D, cAMP-specific                                      |          |
| 244025_at          | 85450          | <i>ITPRIP</i>        | 3.00E-04    | 4.49        | inositol 1,4,5-trisphosphate receptor interacting protein                |          |
| 205290_s_at        | 650            | <i>BMP2</i>          | 1.20E-03    | 4.45        | bone morphogenetic protein 2                                             |          |
| 209774_x_at        | 2920           | <i>CXCL2</i>         | 1.80E-03    | 4.40        | chemokine (C-X-C motif) ligand 2                                         |          |
| 205330_at          | 4330           | <i>MN1</i>           | 1.20E-03    | 4.40        | meningioma (disrupted in balanced translocation) 1                       |          |
| 1562321_at         | 5166           | <i>PDK4</i>          | 1.34E-01    | 4.35        | pyruvate dehydrogenase kinase, isozyme 4                                 |          |
| 230748_at          | 9120           | <i>SLC16A6</i>       | 1.00E-04    | 4.32        | solute carrier family 16, member 6                                       |          |
| 209583_s_at        | 4345           | <i>CD200</i>         | 1.11E-05    | 4.30        | CD200 molecule                                                           |          |
| 227613_at          | 55422          | <i>ZNF331</i>        | 2.00E-04    | 4.30        | zinc finger protein 331                                                  |          |
| 207038_at          | 9120           | <i>SLC16A6</i>       | 3.20E-03    | 4.29        | solute carrier family 16, member 6                                       |          |
| 220088_at          | 728            | <i>CSAR1</i>         | 5.00E-04    | 4.23        | complement component 5a receptor 1                                       |          |
| 211143_x_at        | 3164           | <i>NR4A1</i>         | 5.00E-04    | 4.17        | nuclear receptor subfamily 4, group A, member 1                          |          |
| 219228_at          | 55422          | <i>ZNF331</i>        | 3.00E-04    | 4.12        | zinc finger protein 331                                                  |          |
| 229552_at          | 8739           | <i>HRK</i>           | 3.00E-04    | 4.08        | harakiri, BCL2 interacting protein                                       |          |
|                    | 283454         | <i>LOC283454</i>     |             |             | uncharacterized LOC283454                                                |          |
| 239367_at          | 627            | <i>BDNF</i>          | 3.74E-05    | 4.05        | brain-derived neurotrophic factor                                        |          |
| 208083_s_at        | 3694           | <i>ITGB6</i>         | 7.49E-02    | 4.05        | integrin beta 6                                                          |          |
|                    | 100505984      | <i>LOC100505984</i>  |             |             | uncharacterized LOC100505984                                             |          |
| 213182_x_at        | 1028           | <i>CDKN1C</i>        | 2.68E-02    | 4.02        | cyclin-dependent kinase inhibitor 1C (p57, Kip2)                         |          |
| 202340_x_at        | 3164           | <i>NR4A1</i>         | 1.60E-03    | 3.97        | nuclear receptor subfamily 4, group A, member 1                          |          |
| 219911_s_at        | 28231          | <i>SLCO4A1</i>       | 2.40E-03    | 3.84        | solute carrier organic anion transporter family, member 4A1              |          |
| 1559141_s_at       | 157693         | <i>FAM87A</i>        | 8.00E-03    | 3.81        | family with sequence similarity 87, member A                             |          |
|                    | 400728         | <i>FAM87B</i>        |             |             | family with sequence similarity 87, member B                             |          |
| 219534_x_at        | 1028           | <i>CDKN1C</i>        | 1.81E-02    | 3.76        | cyclin-dependent kinase inhibitor 1C (p57, Kip2)                         |          |
| 224828_at          | 80315          | <i>CPEB4</i>         | 3.00E-04    | 3.74        | cytoplasmic polyadenylation element binding protein 4                    |          |
| 229709_at          | 483            | <i>ATP1B3</i>        | 6.20E-03    | 3.73        | ATPase, Na <sup>+</sup> /K <sup>+</sup> transporting, beta 3 polypeptide |          |
| 206382_s_at        | 627            | <i>BDNF</i>          | 1.00E-04    | 3.72        | brain-derived neurotrophic factor                                        |          |
| 219682_s_at        | 6926           | <i>TBX3</i>          | 9.99E-05    | 3.59        | T-box 3                                                                  |          |
| 203549_s_at        | 4023           | <i>LPL</i>           | 2.00E-04    | 3.57        | lipoprotein lipase                                                       |          |
| 224829_at          | 80315          | <i>CPEB4</i>         | 2.00E-04    | 3.53        | cytoplasmic polyadenylation element binding protein 4                    |          |
| 216894_x_at        | 1028           | <i>CDKN1C</i>        | 7.80E-03    | 3.47        | cyclin-dependent kinase inhibitor 1C (p57, Kip2)                         |          |
| 206865_at          | 8739           | <i>HRK</i>           | 2.00E-04    | 3.47        | harakiri, BCL2 interacting protein                                       |          |
| 239818_x_at        | 10221          | <i>TRIB1</i>         | 2.00E-04    | 3.46        | tribbles pseudokinase 1                                                  |          |
| 218177_at          | 57132          | <i>CHMP1B</i>        | 2.00E-04    | 3.39        | charged multivesicular body protein 1B                                   |          |
| 218995_s_at        | 1906           | <i>EDN1</i>          | 8.59E-05    | 3.36        | endothelin 1                                                             |          |
| 1552755_at         | 157983         | <i>C9orf66</i>       | 8.11E-02    | 3.35        | chromosome 9 open reading frame 66                                       |          |
| 216236_s_at        | 6515           | <i>SLC2A14</i>       | 9.78E-05    | 3.35        | solute carrier family 2 (facilitated glucose transporter), member 14     |          |
|                    | 144195         | <i>SLC2A3</i>        |             |             | solute carrier family 2 (facilitated glucose transporter), member 3      |          |
| 213348_at          | 1028           | <i>CDKN1C</i>        | 8.70E-03    | 3.32        | cyclin-dependent kinase inhibitor 1C (p57, Kip2)                         |          |
| 213006_at          | 1052           | <i>CEBPD</i>         | 8.00E-04    | 3.32        | CCAAT/enhancer binding protein (C/EBP), delta                            |          |
| 202241_at          | 10221          | <i>TRIB1</i>         | 3.74E-05    | 3.31        | tribbles pseudokinase 1                                                  |          |
| 209631_s_at        | 2861           | <i>GPR37</i>         | 2.00E-04    | 3.30        | G protein-coupled receptor 37 (endothelin receptor type B-like)          |          |
| 202497_x_at        | 6515           | <i>SLC2A3</i>        | 2.00E-04    | 3.30        | solute carrier family 2 (facilitated glucose transporter), member 3      |          |
| 228128_x_at        | 5069           | <i>PAPPA</i>         | 4.00E-04    | 3.28        | pregnancy-associated plasma protein A, pappalysin 1                      |          |
| 201981_at          | 5069           | <i>PAPPA</i>         | 2.68E-02    | 3.21        | pregnancy-associated plasma protein A, pappalysin 1                      |          |
| 203548_s_at        | 4023           | <i>LPL</i>           | 2.00E-04    | 3.18        | lipoprotein lipase                                                       |          |
| 224831_at          | 80315          | <i>CPEB4</i>         | 2.00E-04    | 3.17        | cytoplasmic polyadenylation element binding protein 4                    |          |
| 222088_s_at        | 6515           | <i>SLC2A14</i>       | 3.00E-04    | 3.16        | solute carrier family 2 (facilitated glucose transporter), member 14     |          |
|                    | 144195         | <i>SLC2A3</i>        |             |             | solute carrier family 2 (facilitated glucose transporter), member 3      |          |
| 228325_at          | 23514          | <i>SPDR</i>          | 8.00E-04    | 3.16        | scaffolding protein involved in DNA repair                               |          |
| 220483_s_at        | 25897          | <i>RNF19A</i>        | 5.00E-04    | 3.13        | ring finger protein 19A, RBR E3 ubiquitin protein ligase                 |          |
| 202499_s_at        | 6515           | <i>SLC2A3</i>        | 5.00E-04    | 3.11        | solute carrier family 2 (facilitated glucose transporter), member 3      |          |
| 224942_at          | 5069           | <i>PAPPA</i>         | 7.00E-04    | 3.09        | pregnancy-associated plasma protein A, pappalysin 1                      |          |

|                    |             |                         |                 |             |                                                                                   |  |
|--------------------|-------------|-------------------------|-----------------|-------------|-----------------------------------------------------------------------------------|--|
| 202498_s_at        | 6515        | <i>SLC2A3</i>           | 1.00E-03        | 3.04        | solute carrier family 2 (facilitated glucose transporter), member 3               |  |
| 224940_s_at        | 5069        | <i>PAPPA</i>            | 8.00E-04        | 3.03        | pregnancy-associated plasma protein A, pappalysin 1                               |  |
| 239123_s_at        | 8848        | <i>TSC22D1</i>          | 1.21E-02        | 3.03        | TSC22 domain family, member 1                                                     |  |
| 218178_s_at        | 57132       | <i>CHMP1B</i>           | 1.77E-05        | 3.00        | charged multivesicular body protein 1B                                            |  |
| 203984_s_at        | 842         | <i>CASP9</i>            | 4.80E-03        | 2.99        | caspace 9                                                                         |  |
| 222802_s_at        | 1906        | <i>EDN1</i>             | 8.34E-05        | 2.98        | endothelin 1                                                                      |  |
| 226614_s_at        | 83648       | <i>FAM167A</i>          | 5.00E-04        | 2.96        | family with sequence similarity 167, member A                                     |  |
| 205027_s_at        | 1326        | <i>MAP3K8</i>           | 1.70E-03        | 2.93        | mitogen-activated protein kinase kinase kinase 8                                  |  |
| <b>204456_s_at</b> | <b>2619</b> | <b><i>GAS1</i></b>      | <b>5.50E-03</b> | <b>2.91</b> | <b>growth arrest-specific 1</b>                                                   |  |
| 212226_s_at        | 8613        | <i>PLPP3</i>            | 6.82E-05        | 2.90        | phospholipid phosphatase 3                                                        |  |
| 218723_s_at        | 28984       | <i>RGCC</i>             | 1.02E-02        | 2.89        | regulator of cell cycle                                                           |  |
| 212977_s_at        | 57007       | <i>ACKR3</i>            | 9.84E-05        | 2.87        | atypical chemokine receptor 3                                                     |  |
| <b>208228_s_at</b> | <b>2263</b> | <b><i>FGFR2</i></b>     | <b>1.00E-04</b> | <b>2.86</b> | <b>fibroblast growth factor receptor 2</b>                                        |  |
| 225516_s_at        | 6542        | <i>SLC7A2</i>           | 1.00E-04        | 2.84        | solute carrier family 7 (cationic amino acid transporter, y+ system), member 2    |  |
| 209355_s_at        | 8613        | <i>PLPP3</i>            | 7.59E-05        | 2.83        | phospholipid phosphatase 3                                                        |  |
| 225544_s_at        | 6926        | <i>TBX3</i>             | 1.00E-04        | 2.82        | T-box 3                                                                           |  |
| 230472_s_at        | 79192       | <i>IRX1</i>             | 7.00E-04        | 2.81        | iroquois homeobox 1                                                               |  |
| 210775_x_at        | 842         | <i>CASP9</i>            | 5.20E-03        | 2.77        | caspace 9                                                                         |  |
| 237187_s_at        | 8739        | <i>HRK</i>              | 3.20E-03        | 2.77        | harakiri, BCL2 interacting protein                                                |  |
| 224941_s_at        | 5069        | <i>PAPPA</i>            | 2.60E-03        | 2.77        | pregnancy-associated plasma protein A, pappalysin 1                               |  |
| 225606_s_at        | 10018       | <i>BCL2L11</i>          | 1.00E-04        | 2.76        | BCL2-like 11 (apoptosis facilitator)                                              |  |
| 219316_s_at        | 55640       | <i>FLVCR2</i>           | 2.20E-03        | 2.72        | feline leukemia virus subgroup C cellular receptor family, member 2               |  |
| 228340_s_at        | 7090        | <i>TLE3</i>             | 5.60E-02        | 2.69        | transducin-like enhancer of split 3                                               |  |
| 1553613_s_at       | 2296        | <i>FOXC1</i>            | 1.54E-05        | 2.67        | forkhead box C1                                                                   |  |
| 209681_s_at        | 10560       | <i>SLC19A2</i>          | 4.50E-03        | 2.67        | solute carrier family 19 (thiamine transporter), member 2                         |  |
| 235085_s_at        | 157285      | <i>PRAG1</i>            | 5.20E-03        | 2.65        | homolog of rat pragma of Rnd2                                                     |  |
| 214446_s_at        | 22936       | <i>ELL2</i>             | 1.02E-02        | 2.63        | elongation factor, RNA polymerase II, 2                                           |  |
| 209189_s_at        | 2353        | <i>FOS</i>              | 6.00E-03        | 2.63        | FBJ murine osteosarcoma viral oncogene homolog                                    |  |
| 223085_s_at        | 25897       | <i>RNF19A</i>           | 2.00E-04        | 2.62        | ring finger protein 19A, RBR E3 ubiquitin protein ligase                          |  |
| 222015_s_at        | 1454        | <i>CSNK1E</i>           | 5.00E-04        | 2.61        | casein kinase 1, epsilon                                                          |  |
|                    | 102800317   | <i>LOC400927-CSNK1E</i> |                 |             | LOC400927-CSNK1E readthrough                                                      |  |
| 227443_s_at        | 286343      | <i>LURAP1L</i>          | 1.36E-02        | 2.61        | leucine rich adaptor protein 1-like                                               |  |
| 205239_s_at        | 374         | <i>AREG</i>             | 4.20E-03        | 2.60        | amphiregulin                                                                      |  |
| 218880_s_at        | 2355        | <i>FOSL2</i>            | 3.00E-04        | 2.60        | FOS-like antigen 2                                                                |  |
| 224325_s_at        | 8325        | <i>FZD8</i>             | 9.00E-03        | 2.60        | frizzled class receptor 8                                                         |  |
| 227099_s_at        | 387763      | <i>C11orf96</i>         | 6.76E-02        | 2.59        | chromosome 11 open reading frame 96                                               |  |
| 227188_s_at        | 59271       | <i>EVA1C</i>            | 8.50E-03        | 2.59        | eva-1 homolog C (C. elegans)                                                      |  |
| 206924_s_at        | 3589        | <i>IL11</i>             | 3.00E-03        | 2.59        | interleukin 11                                                                    |  |
| 229004_s_at        | 170689      | <i>ADAMTS15</i>         | 9.99E-05        | 2.58        | ADAM metalloproteinase with thrombospondin type 1 motif 15                        |  |
| 214438_s_at        | 3142        | <i>HLX</i>              | 3.38E-02        | 2.57        | H2.0-like homeobox                                                                |  |
| 36711_s_at         | 23764       | <i>MAFF</i>             | 1.00E-04        | 2.57        | v-maf avian musculoaponeurotic fibrosarcoma oncogene homolog F                    |  |
| 205193_s_at        | 23764       | <i>MAFF</i>             | 7.00E-04        | 2.57        | v-maf avian musculoaponeurotic fibrosarcoma oncogene homolog F                    |  |
| 227337_s_at        | 353322      | <i>ANKRD37</i>          | 3.00E-04        | 2.56        | ankyrin repeat domain 37                                                          |  |
| 220225_s_at        | 50805       | <i>IRX4</i>             | 6.60E-03        | 2.56        | iroquois homeobox 4                                                               |  |
| 218631_s_at        | 60370       | <i>AVP11</i>            | 6.05E-05        | 2.55        | arginine vasopressin-induced 1                                                    |  |
| 225987_s_at        | 79689       | <i>STEAP4</i>           | 4.00E-04        | 2.54        | STEAP family member 4                                                             |  |
| 230398_s_at        | 84951       | <i>TNS4</i>             | 1.11E-02        | 2.54        | tensin 4                                                                          |  |
| 215111_s_at        | 8848        | <i>TSC22D1</i>          | 4.60E-03        | 2.53        | TSC22 domain family, member 1                                                     |  |
| 205409_s_at        | 2355        | <i>FOSL2</i>            | 5.70E-03        | 2.52        | FOS-like antigen 2                                                                |  |
| 1553133_s_at       | 203228      | <i>C9orf72</i>          | 2.60E-03        | 2.51        | chromosome 9 open reading frame 72                                                |  |
| 212230_s_at        | 8613        | <i>PLPP3</i>            | 3.26E-05        | 2.51        | phospholipid phosphatase 3                                                        |  |
| <b>201044_x_at</b> | <b>1843</b> | <b><i>DUSP1</i></b>     | <b>2.00E-04</b> | <b>2.50</b> | <b>dual specificity phosphatase 1</b>                                             |  |
| <b>208250_s_at</b> | <b>1755</b> | <b><i>DNMT1</i></b>     | <b>8.63E-05</b> | <b>2.48</b> | <b>deleted in malignant brain tumors 1</b>                                        |  |
| 236911_s_at        | 57494       | <i>RIMKB</i>            | 2.53E-02        | 2.48        | ribosomal modification protein rimK-like family member B                          |  |
| 202150_s_at        | 4739        | <i>NEDD9</i>            | 4.00E-04        | 2.47        | neural precursor cell expressed, developmentally down-regulated 9                 |  |
| 202723_s_at        | 2308        | <i>FOXO1</i>            | 3.20E-03        | 2.46        | forkhead box O1                                                                   |  |
| 202768_s_at        | 2354        | <i>FOSB</i>             | 7.40E-03        | 2.43        | FBJ murine osteosarcoma viral oncogene homolog B                                  |  |
| 206404_s_at        | 2254        | <i>FGF9</i>             | 4.00E-04        | 2.42        | fibroblast growth factor 9                                                        |  |
| 213221_s_at        | 23235       | <i>SIK2</i>             | 3.30E-03        | 2.42        | salt-inducible kinase 2                                                           |  |
| 205466_s_at        | 9957        | <i>HS3ST1</i>           | 2.21E-02        | 2.40        | heparan sulfate (glucosamine) 3-O-sulfotransferase 1                              |  |
| 201169_s_at        | 8553        | <i>BHLHE40</i>          | 5.60E-03        | 2.39        | basic helix-loop-helix family, member e40                                         |  |
| 210136_s_at        | 4155        | <i>MBP</i>              | 7.00E-04        | 2.39        | myelin basic protein                                                              |  |
| 202149_s_at        | 4739        | <i>NEDD9</i>            | 3.00E-04        | 2.38        | neural precursor cell expressed, developmentally down-regulated 9                 |  |
| 203574_s_at        | 4783        | <i>NFIL3</i>            | 5.00E-04        | 2.38        | nuclear factor, interleukin 3 regulated                                           |  |
| 223379_s_at        | 26524       | <i>LATS2</i>            | 3.00E-04        | 2.37        | large tumor suppressor kinase 2                                                   |  |
| 207626_s_at        | 6542        | <i>SLC7A2</i>           | 3.00E-04        | 2.37        | solute carrier family 7 (cationic amino acid transporter, y+ system), member 2    |  |
| 213139_s_at        | 6591        | <i>SNAI2</i>            | 5.20E-03        | 2.37        | snail family zinc finger 2                                                        |  |
| 224797_s_at        | 57561       | <i>ARRDC3</i>           | 5.80E-03        | 2.36        | arrestin domain containing 3                                                      |  |
| 215990_s_at        | 604         | <i>BCL6</i>             | 9.30E-03        | 2.36        | B-cell CLL/lymphoma 6                                                             |  |
| 224480_s_at        | 84803       | <i>GPAT3</i>            | 1.27E-01        | 2.36        | glycerol-3-phosphate acyltransferase 3                                            |  |
| 231035_s_at        | 220213      | <i>OTUD1</i>            | 3.70E-03        | 2.36        | OTU deubiquitinase 1                                                              |  |
| 226858_s_at        | 1454        | <i>CSNK1E</i>           | 4.00E-04        | 2.34        | casein kinase 1, epsilon                                                          |  |
|                    | 102800317   | <i>LOC400927-CSNK1E</i> |                 |             | LOC400927-CSNK1E readthrough                                                      |  |
| 209101_s_at        | 1490        | <i>CTGF</i>             | 3.00E-04        | 2.34        | connective tissue growth factor                                                   |  |
| 231067_s_at        | 9590        | <i>AKAP12</i>           | 1.51E-02        | 2.33        | A kinase (PRKA) anchor protein 12                                                 |  |
| 220335_x_at        | 23491       | <i>CES3</i>             | 1.70E-03        | 2.33        | carboxylesterase 3                                                                |  |
| 216627_s_at        | 2683        | <i>B4GALT1</i>          | 6.80E-03        | 2.32        | UDP-Gal:betaGlcNAc beta 1,4-galactosyltransferase, polypeptide 1                  |  |
| 218881_s_at        | 2355        | <i>FOSL2</i>            | 3.00E-03        | 2.32        | FOS-like antigen 2                                                                |  |
| 237252_s_at        | 7056        | <i>THBD</i>             | 1.58E-02        | 2.32        | thrombomodulin                                                                    |  |
| 208606_s_at        | 54361       | <i>WNT4</i>             | 9.27E-02        | 2.32        | wingless-type MMTV integration site family, member 4                              |  |
| 208536_s_at        | 10018       | <i>BCL2L11</i>          | 2.11E-02        | 2.28        | BCL2-like 11 (apoptosis facilitator)                                              |  |
| 203796_s_at        | 605         | <i>BCL7A</i>            | 4.00E-04        | 2.28        | B-cell CLL/lymphoma 7A                                                            |  |
| 212099_s_at        | 388         | <i>RHOB</i>             | 4.00E-04        | 2.28        | ras homolog family member B                                                       |  |
| 203313_s_at        | 7050        | <i>TGIF1</i>            | 6.00E-04        | 2.28        | TGF-beta-induced factor homeobox 1                                                |  |
| 223484_s_at        | 84419       | <i>C15orf48</i>         | 1.32E-01        | 2.27        | chromosome 15 open reading frame 48                                               |  |
| 229720_s_at        | 573         | <i>BAG1</i>             | 1.50E-03        | 2.25        | BCL2-associated athanogene                                                        |  |
| 1558143_a_at       | 10018       | <i>BCL2L11</i>          | 5.00E-03        | 2.25        | BCL2-like 11 (apoptosis facilitator)                                              |  |
| 219195_s_at        | 10891       | <i>PPARGC1A</i>         | 1.14E-02        | 2.24        | peroxisome proliferator-activated receptor gamma, coactivator 1 alpha             |  |
| 223430_s_at        | 23235       | <i>SIK2</i>             | 1.84E-02        | 2.23        | salt-inducible kinase 2                                                           |  |
| 207213_s_at        | 9099        | <i>USP2</i>             | 3.00E-03        | 2.23        | ubiquitin specific peptidase 2                                                    |  |
| 238987_s_at        | 2683        | <i>B4GALT1</i>          | 8.84E-02        | 2.22        | UDP-Gal:betaGlcNAc beta 1,4-galactosyltransferase, polypeptide 1                  |  |
| 228625_s_at        | 163732      | <i>CITED4</i>           | 4.00E-04        | 2.22        | Cbp/p300-interacting transactivator, with Glu/Asp rich carboxy-terminal domain, 4 |  |
| 225955_s_at        | 284207      | <i>METRNL</i>           | 1.00E-04        | 2.22        | meteorin, glial cell differentiation regulator-like                               |  |
| 1554544_a_at       | 4155        | <i>MBP</i>              | 7.00E-04        | 2.21        | myelin basic protein                                                              |  |

|              |           |                 |          |      |                                                                               |  |
|--------------|-----------|-----------------|----------|------|-------------------------------------------------------------------------------|--|
| 200731_s_at  | 7803      | <i>PTP4A1</i>   | 1.09E-02 | 2.21 | protein tyrosine phosphatase type IVA, member 1                               |  |
| 203887_s_at  | 7056      | <i>THBD</i>     | 1.69E-02 | 2.21 | thrombomodulin                                                                |  |
| 202023_s_at  | 1942      | <i>EFNA1</i>    | 2.00E-04 | 2.20 | ephrin-A1                                                                     |  |
| 221841_s_at  | 9314      | <i>KLFA</i>     | 9.90E-03 | 2.20 | Kruppel-like factor 4 (gut)                                                   |  |
| 206472_s_at  | 7090      | <i>TLE3</i>     | 8.63E-02 | 2.19 | transducin-like enhancer of split 3                                           |  |
| 201170_s_at  | 8553      | <i>BHLHE40</i>  | 4.00E-04 | 2.18 | basic helix-loop-helix family, member e40                                     |  |
| 202672_s_at  | 467       | <i>ATF3</i>     | 8.00E-04 | 2.17 | activating transcription factor 3                                             |  |
| 228188_s_at  | 2355      | <i>FOSL2</i>    | 8.00E-04 | 2.17 | FOS-like antigen 2                                                            |  |
| 221011_s_at  | 81606     | <i>LBH</i>      | 3.00E-04 | 2.17 | limb bud and heart development                                                |  |
| 222784_s_at  | 64093     | <i>SMOC1</i>    | 3.10E-02 | 2.17 | SPARC related modular calcium binding 1                                       |  |
| 226575_s_at  | 58499     | <i>ZNF462</i>   | 1.00E-03 | 2.17 | zinc finger protein 462                                                       |  |
| 219433_s_at  | 54880     | <i>BCOR</i>     | 1.35E-02 | 2.16 | BCL6 corepressor                                                              |  |
| 205870_s_at  | 624       | <i>BDKRB2</i>   | 3.27E-02 | 2.16 | bradykinin receptor B2                                                        |  |
| 204014_s_at  | 1846      | <i>DUSP4</i>    | 5.20E-03 | 2.16 | dual specificity phosphatase 4                                                |  |
| 225262_s_at  | 2355      | <i>FOSL2</i>    | 1.00E-04 | 2.16 | FOS-like antigen 2                                                            |  |
| 209184_s_at  | 8660      | <i>IRS2</i>     | 7.00E-04 | 2.15 | insulin receptor substrate 2                                                  |  |
| 213260_s_at  | 2296      | <i>FOXC1</i>    | 5.34E-05 | 2.14 | forkhead box C1                                                               |  |
| 234804_s_at  | 283571    | <i>PROX2</i>    | 1.29E-01 | 2.14 | prospero homeobox 2                                                           |  |
| 200732_s_at  | 7803      | <i>PTP4A1</i>   | 2.30E-03 | 2.14 | protein tyrosine phosphatase type IVA, member 1                               |  |
| 206035_s_at  | 5966      | <i>REL</i>      | 2.90E-03 | 2.13 | v-rel avian reticuloendotheliosis viral oncogene homolog                      |  |
| 205896_s_at  | 6583      | <i>SLC22A4</i>  | 2.08E-02 | 2.13 | solute carrier family 22 (organic cation/zwitterion transporter), member 4    |  |
| 203290_s_at  | 3117      | <i>HLA-DQA1</i> | 3.73E-02 | 2.12 | major histocompatibility complex, class II, DQ alpha 1                        |  |
| 1553962_s_at | 388       | <i>RHOB</i>     | 1.40E-03 | 2.12 | ras homolog family member B                                                   |  |
| 1556185_a_at | 79689     | <i>STEAP4</i>   | 3.99E-02 | 2.12 | STEAP family member 4                                                         |  |
| 212143_s_at  | 3486      | <i>IGFBP3</i>   | 1.70E-03 | 2.11 | insulin like growth factor binding protein 3                                  |  |
| 204032_s_at  | 8412      | <i>BCAR3</i>    | 4.00E-03 | 2.10 | breast cancer anti-estrogen resistance 3                                      |  |
| 211631_x_at  | 2683      | <i>BAGALT1</i>  | 3.66E-02 | 2.09 | UDP-Gal:betaGlcNAc beta 1,4-galactosyltransferase, polypeptide 1              |  |
| 209772_s_at  | 100133941 | <i>CD24</i>     | 3.00E-04 | 2.09 | CD24 molecule                                                                 |  |
| 224572_s_at  | 359948    | <i>IRF2BP2</i>  | 3.00E-04 | 2.09 | interferon regulatory factor 2 binding protein 2                              |  |
| 233002_s_at  | 57718     | <i>PPP4R4</i>   | 1.53E-02 | 2.09 | protein phosphatase 4, regulatory subunit 4                                   |  |
| 207826_s_at  | 3399      | <i>ID3</i>      | 1.10E-03 | 2.08 | inhibitor of DNA binding 3, dominant negative helix-loop-helix protein        |  |
| 233379_s_at  | 79899     | <i>PRR5L</i>    | 1.35E-02 | 2.08 | proline rich 5 like                                                           |  |
| 225999_s_at  | 57494     | <i>RIMKLB</i>   | 3.10E-03 | 2.08 | ribosomal modification protein rimk-like family member B                      |  |
| 203140_s_at  | 604       | <i>BCL6</i>     | 9.00E-04 | 2.07 | B-cell CLL/lymphoma 6                                                         |  |
| 223566_s_at  | 54880     | <i>BCOR</i>     | 5.30E-03 | 2.07 | BCL6 corepressor                                                              |  |
| 227458_s_at  | 29126     | <i>CD274</i>    | 3.20E-03 | 2.07 | CD274 molecule                                                                |  |
| 202724_s_at  | 2308      | <i>FOXO1</i>    | 1.80E-03 | 2.07 | forkhead box O1                                                               |  |
| 205051_s_at  | 3815      | <i>KIT</i>      | 2.70E-03 | 2.07 | v-kit Hardy-Zuckerman 4 feline sarcoma viral oncogene homolog                 |  |
| 205157_s_at  | 3872      | <i>KRT17</i>    | 3.12E-02 | 2.07 | keratin 17, type I                                                            |  |
| 225407_s_at  | 4155      | <i>MBP</i>      | 8.00E-04 | 2.07 | myelin basic protein                                                          |  |
| 223834_s_at  | 29126     | <i>CD274</i>    | 5.60E-03 | 2.06 | CD274 molecule                                                                |  |
| 209457_s_at  | 1847      | <i>DUSP5</i>    | 1.90E-03 | 2.06 | dual specificity phosphatase 5                                                |  |
| 230348_s_at  | 26524     | <i>LATS2</i>    | 7.70E-03 | 2.06 | large tumor suppressor kinase 2                                               |  |
| 204284_s_at  | 5507      | <i>PPP1R3C</i>  | 2.53E-02 | 2.06 | protein phosphatase 1, regulatory subunit 3C                                  |  |
| 218113_s_at  | 23670     | <i>TMEM2</i>    | 7.00E-04 | 2.06 | transmembrane protein 2                                                       |  |
| 227529_s_at  | 9590      | <i>AKAP12</i>   | 9.90E-03 | 2.05 | A kinase (PRKA) anchor protein 12                                             |  |
| 203795_s_at  | 605       | <i>BCL7A</i>    | 3.50E-03 | 2.05 | B-cell CLL/lymphoma 7A                                                        |  |
| 219383_s_at  | 79899     | <i>PRR5L</i>    | 1.70E-03 | 2.05 | proline rich 5 like                                                           |  |
| 223916_s_at  | 54880     | <i>BCOR</i>     | 3.60E-02 | 2.04 | BCL6 corepressor                                                              |  |
| 216598_s_at  | 6347      | <i>CCL2</i>     | 2.10E-03 | 2.03 | chemokine (C-C motif) ligand 2                                                |  |
| 201925_s_at  | 1604      | <i>CD55</i>     | 1.99E-02 | 2.03 | CD55 molecule, decay accelerating factor for complement (Cromer blood group)  |  |
| 228462_s_at  | 153572    | <i>IRX2</i>     | 6.00E-04 | 2.03 | iroquois homeobox 2                                                           |  |
| 220540_s_at  | 60598     | <i>KCNK15</i>   | 7.93E-02 | 2.03 | potassium channel, two pore domain subfamily K, member 15                     |  |
| 231798_s_at  | 9241      | <i>NOG</i>      | 6.00E-04 | 2.03 | noggin                                                                        |  |
| 217584_s_at  | 4864      | <i>NPC1</i>     | 2.11E-02 | 2.03 | Niemann-Pick disease, type C1                                                 |  |
| 228284_s_at  | 7088      | <i>TLE1</i>     | 4.00E-03 | 2.03 | transducin-like enhancer of split 1 (E(sp1) homolog, Drosophila)              |  |
| 241547_s_at  | 29974     | <i>A1CF</i>     | 4.11E-02 | 2.02 | APOBEC1 complementation factor                                                |  |
| 203708_s_at  | 5142      | <i>PDE4B</i>    | 2.22E-02 | 2.02 | phosphodiesterase 4B, cAMP-specific                                           |  |
| 225919_s_at  | 203228    | <i>C9orf72</i>  | 3.44E-02 | 2.01 | chromosome 9 open reading frame 72                                            |  |
| 225626_s_at  | 55824     | <i>PAG1</i>     | 5.80E-02 | 2.01 | phosphoprotein membrane anchor with glycosphingolipid microdomains 1          |  |
| 1554980_a_at | 467       | <i>ATF3</i>     | 8.00E-04 | 2.00 | activating transcription factor 3                                             |  |
| 1555950_a_at | 1604      | <i>CD55</i>     | 6.90E-03 | 2.00 | CD55 molecule, decay accelerating factor for complement (Cromer blood group)  |  |
| 213844_s_at  | 3202      | <i>HOXA5</i>    | 9.00E-03 | 2.00 | homeobox A5                                                                   |  |
| 206864_s_at  | 8739      | <i>HRK</i>      | 5.00E-04 | 2.00 | harakiri, BCL2 interacting protein                                            |  |
| 1555486_a_at | 79899     | <i>PRR5L</i>    | 2.00E-04 | 2.00 | proline rich 5 like                                                           |  |
| 204654_s_at  | 7020      | <i>TFAP2A</i>   | 6.70E-03 | 2.00 | transcription factor AP-2 alpha (activating enhancer binding protein 2 alpha) |  |
| 239178_s_at  | 2254      | <i>FGF9</i>     | 2.11E-02 | 1.99 | fibroblast growth factor 9                                                    |  |
| 203108_s_at  | 9052      | <i>GPRC5A</i>   | 6.00E-04 | 1.99 | G protein-coupled receptor, class C, group 5, member A                        |  |
| 220187_s_at  | 79689     | <i>STEAP4</i>   | 9.40E-03 | 1.99 | STEAP family member 4                                                         |  |
| 229337_s_at  | 9099      | <i>USP2</i>     | 2.33E-02 | 1.99 | ubiquitin specific peptidase 2                                                |  |
| 236352_s_at  | 245806    | <i>VGLL2</i>    | 1.53E-02 | 1.99 | vestigial-like family member 2                                                |  |
| 242162_s_at  | 164781    | <i>DAW1</i>     | 1.51E-02 | 1.98 | dynein assembly factor with WDR repeat domains 1                              |  |
| 226206_s_at  | 7975      | <i>MAFK</i>     | 3.00E-04 | 1.98 | v-maf avian musculoaponeurotic fibrosarcoma oncogene homolog K                |  |
| 235421_s_at  | 1326      | <i>MAP3K8</i>   | 4.99E-02 | 1.98 | mitogen-activated protein kinase kinase kinase 8                              |  |
| 224570_s_at  | 359948    | <i>IRF2BP2</i>  | 3.20E-03 | 1.97 | interferon regulatory factor 2 binding protein 2                              |  |
| 229889_s_at  | 388341    | <i>LRRRC75A</i> | 1.78E-02 | 1.97 | leucine rich repeat containing 75A                                            |  |
| 228293_s_at  | 91614     | <i>DEPDC7</i>   | 1.70E-03 | 1.96 | DEP domain containing 7                                                       |  |
| 201328_s_at  | 2114      | <i>ETS2</i>     | 7.00E-04 | 1.96 | v-ets avian erythroblastosis virus E26 oncogene homolog 2                     |  |
| 210162_s_at  | 4772      | <i>NFATC1</i>   | 8.00E-04 | 1.96 | nuclear factor of activated T-cells, cytoplasmic, calcineurin-dependent 1     |  |
| 219737_s_at  | 5101      | <i>PCDH9</i>    | 6.30E-03 | 1.96 | protocadherin 9                                                               |  |
| 218691_s_at  | 8572      | <i>PDLIM4</i>   | 1.00E-01 | 1.96 | PDZ and LIM domain 4                                                          |  |
| 212444_s_at  | 9052      | <i>GPRC5A</i>   | 8.00E-04 | 1.95 | G protein-coupled receptor, class C, group 5, member A                        |  |
| 228812_s_at  | 5966      | <i>REL</i>      | 6.90E-03 | 1.95 | v-rel avian reticuloendotheliosis viral oncogene homolog                      |  |
| 222343_s_at  | 10018     | <i>BCL2L11</i>  | 5.00E-03 | 1.94 | BCL2-like 11 (apoptosis facilitator)                                          |  |
| 224826_s_at  | 56261     | <i>GPCPD1</i>   | 2.40E-03 | 1.94 | glycerophosphocholine phosphodiesterase 1                                     |  |
| 203372_s_at  | 8835      | <i>SOC32</i>    | 6.82E-02 | 1.94 | suppressor of cytokine signaling 2                                            |  |
| 226034_s_at  | 1846      | <i>DUSP4</i>    | 1.60E-03 | 1.93 | dual specificity phosphatase 4                                                |  |
| 224835_s_at  | 56261     | <i>GPCPD1</i>   | 4.20E-03 | 1.93 | glycerophosphocholine phosphodiesterase 1                                     |  |
| 201473_s_at  | 3726      | <i>JUNB</i>     | 1.15E-01 | 1.93 | jun B proto-oncogene                                                          |  |
| 215034_s_at  | 4071      | <i>TM4SF1</i>   | 2.90E-02 | 1.93 | transmembrane 4 L six family member 1                                         |  |
| 227530_s_at  | 9590      | <i>AKAP12</i>   | 1.16E-02 | 1.92 | A kinase (PRKA) anchor protein 12                                             |  |
| 208650_s_at  | 100133941 | <i>CD24</i>     | 4.10E-03 | 1.92 | CD24 molecule                                                                 |  |
| 225408_s_at  | 4155      | <i>MBP</i>      | 1.00E-03 | 1.92 | myelin basic protein                                                          |  |
| 206036_s_at  | 5966      | <i>REL</i>      | 6.80E-03 | 1.92 | v-rel avian reticuloendotheliosis viral oncogene homolog                      |  |

|              |           |                  |          |      |                                                                                             |
|--------------|-----------|------------------|----------|------|---------------------------------------------------------------------------------------------|
| 205074_at    | 6584      | <i>SLC22A5</i>   | 4.20E-03 | 1.92 | solute carrier family 22 (organic cation/carnitine transporter), member 5                   |
| 231183_s_at  | 128710    | <i>SLX4P</i>     | 3.54E-02 | 1.92 | SLX4 interacting protein                                                                    |
| 205286_at    | 7022      | <i>TFAP2C</i>    | 3.09E-02 | 1.92 | transcription factor AP-2 gamma (activating enhancer binding protein 2 gamma)               |
| 209185_s_at  | 8660      | <i>IRS2</i>      | 2.00E-04 | 1.91 | insulin receptor substrate 2                                                                |
| 238419_at    | 90102     | <i>PHLDB2</i>    | 8.17E-02 | 1.91 | pleckstrin homology-like domain, family B, member 2                                         |
| 210095_s_at  | 3486      | <i>IGFBP3</i>    | 9.00E-04 | 1.90 | insulin like growth factor binding protein 3                                                |
| 216268_s_at  | 182       | <i>JAG1</i>      | 8.50E-03 | 1.90 | jagged 1                                                                                    |
| 212236_x_at  | 3872      | <i>KRT17</i>     | 2.53E-02 | 1.90 | keratin 17, type I                                                                          |
| 201416_at    | 6659      | <i>SOX4</i>      | 1.80E-03 | 1.90 | SRY box 4                                                                                   |
| 204597_x_at  | 6781      | <i>STC1</i>      | 8.49E-02 | 1.90 | stanniocalcin 1                                                                             |
| 231899_at    | 85463     | <i>ZC3H12C</i>   | 2.80E-03 | 1.90 | zinc finger CCHC-type containing 12C                                                        |
| 204679_at    | 3775      | <i>KCNK1</i>     | 1.20E-03 | 1.89 | potassium channel, two pore domain subfamily K, member 1                                    |
| 235242_at    | 5966      | <i>REL</i>       | 5.90E-03 | 1.89 | v-rel avian reticuloendotheliosis viral oncogene homolog                                    |
| 230493_at    | 387914    | <i>SHISA2</i>    | 2.70E-03 | 1.89 | shisa family member 2                                                                       |
| 203888_at    | 7056      | <i>THBD</i>      | 4.19E-02 | 1.89 | thrombomodulin                                                                              |
| 227405_s_at  | 8325      | <i>FZD8</i>      | 5.57E-02 | 1.88 | frizzled class receptor 8                                                                   |
| 205992_s_at  | 3600      | <i>IL15</i>      | 4.20E-03 | 1.88 | interleukin 15                                                                              |
| 224571_at    | 359948    | <i>IRF2BP2</i>   | 4.20E-03 | 1.88 | interferon regulatory factor 2 binding protein 2                                            |
| 206706_at    | 4908      | <i>NTF3</i>      | 3.80E-03 | 1.88 | neurotrophin 3                                                                              |
| 231823_s_at  | 285590    | <i>SH3PXD2B</i>  | 3.06E-02 | 1.88 | SH3 and PX domains 2B                                                                       |
| 203373_at    | 8835      | <i>SOC2</i>      | 1.21E-02 | 1.88 | suppressor of cytokine signaling 2                                                          |
| 213003_s_at  | 23514     | <i>SPDR</i>      | 6.71E-02 | 1.88 | scaffolding protein involved in DNA repair                                                  |
| 226208_at    | 57688     | <i>ZSWIM6</i>    | 5.20E-03 | 1.88 | zinc finger, SWIM-type containing 6                                                         |
| 203003_at    | 4209      | <i>MEF2D</i>     | 1.05E-02 | 1.87 | myocyte enhancer factor 2D                                                                  |
| 226140_s_at  | 220213    | <i>OTUD1</i>     | 3.00E-04 | 1.87 | OTU deubiquitinase 1                                                                        |
| 242329_at    | 9586      | <i>CREB5</i>     | 9.69E-02 | 1.86 | cAMP responsive element binding protein 5                                                   |
|              | 401317    | <i>LOC401317</i> |          |      | uncharacterized LOC401317                                                                   |
| 204015_s_at  | 1846      | <i>DUSP4</i>     | 4.30E-03 | 1.86 | dual specificity phosphatase 4                                                              |
| 239058_at    | 2303      | <i>FOXO2</i>     | 2.21E-02 | 1.86 | forkhead box C2                                                                             |
| 201939_at    | 10769     | <i>PLK2</i>      | 9.00E-04 | 1.86 | polo-like kinase 2                                                                          |
| 1553965_x_at | 388       | <i>RHOB</i>      | 1.53E-02 | 1.86 | ras homolog family member B                                                                 |
| 222783_s_at  | 64093     | <i>SMOC1</i>     | 1.05E-02 | 1.86 | SPARC related modular calcium binding 1                                                     |
| 244007_at    | 58499     | <i>ZNF462</i>    | 1.60E-03 | 1.86 | zinc finger protein 462                                                                     |
| 211302_s_at  | 5142      | <i>PDE4B</i>     | 1.39E-01 | 1.85 | phosphodiesterase 4B, cAMP-specific                                                         |
| 235849_at    | 286133    | <i>SCARAS</i>    | 6.50E-03 | 1.85 | scavenger receptor class A, member 5                                                        |
| 202897_at    | 140885    | <i>SIRPA</i>     | 2.18E-02 | 1.85 | signal-regulatory protein alpha                                                             |
| 229529_at    | 6943      | <i>TCF21</i>     | 9.40E-03 | 1.85 | transcription factor 21                                                                     |
| 216379_x_at  | 100133941 | <i>CD24</i>      | 8.00E-04 | 1.84 | CD24 molecule                                                                               |
| 204602_at    | 22943     | <i>DKK1</i>      | 5.26E-02 | 1.84 | dickkopf WNT signaling pathway inhibitor 1                                                  |
| 227354_at    | 55824     | <i>PAG1</i>      | 7.54E-02 | 1.84 | phosphoprotein membrane anchor with glycosphingolipid microdomains 1                        |
| 222258_s_at  | 23677     | <i>SH3BP4</i>    | 1.10E-03 | 1.84 | SH3-domain binding protein 4                                                                |
| 202935_s_at  | 6662      | <i>SOX9</i>      | 2.55E-02 | 1.84 | SRY box 9                                                                                   |
| 224963_at    | 1836      | <i>SLC26A2</i>   | 1.60E-03 | 1.83 | solute carrier family 26 (anion exchanger), member 2                                        |
| 205294_at    | 10458     | <i>BAIAP2</i>    | 1.30E-03 | 1.82 | BAI1-associated protein 2                                                                   |
| 209099_x_at  | 182       | <i>JAG1</i>      | 4.50E-03 | 1.82 | jagged 1                                                                                    |
| 206765_s_at  | 3759      | <i>KCNJ2</i>     | 3.48E-02 | 1.82 | potassium channel, inwardly rectifying subfamily J, member 2                                |
| 203180_at    | 220       | <i>ALDH1A3</i>   | 6.85E-02 | 1.81 | aldehyde dehydrogenase 1 family, member A3                                                  |
| 208651_x_at  | 100133941 | <i>CD24</i>      | 3.60E-02 | 1.81 | CD24 molecule                                                                               |
| 232026_at    | 26091     | <i>HERC4</i>     | 1.44E-01 | 1.81 | HECT and RLD domain containing E3 ubiquitin protein ligase 4                                |
| 229800_at    | 9201      | <i>DCLK1</i>     | 1.00E-03 | 1.80 | doublecortin-like kinase 1                                                                  |
| 228501_at    | 117248    | <i>GALNT15</i>   | 1.84E-02 | 1.80 | polypeptide N-acetylgalactosaminyltransferase 15                                            |
| 204698_at    | 3669      | <i>ISG20</i>     | 2.75E-02 | 1.80 | interferon stimulated exonuclease gene 20kDa                                                |
| 212831_at    | 1955      | <i>MEGF9</i>     | 8.50E-03 | 1.80 | multiple EGF-like-domains 9                                                                 |
| 217678_at    | 23657     | <i>SLC7A11</i>   | 6.00E-04 | 1.80 | solute carrier family 7 (anionic amino acid transporter light chain, xc- system), member 11 |
| 202936_s_at  | 6662      | <i>SOX9</i>      | 7.10E-03 | 1.80 | SRY box 9                                                                                   |
| 204908_s_at  | 602       | <i>BCL3</i>      | 2.90E-02 | 1.79 | B-cell CLL/lymphoma 3                                                                       |
| 201926_s_at  | 1604      | <i>CD55</i>      | 3.07E-02 | 1.79 | CD55 molecule, decay accelerating factor for complement (Cromer blood group)                |
| 204678_s_at  | 3775      | <i>KCNK1</i>     | 5.08E-02 | 1.79 | potassium channel, two pore domain subfamily K, member 1                                    |
| 1557578_at   | 90102     | <i>PHLDB2</i>    | 1.27E-01 | 1.79 | pleckstrin homology-like domain, family B, member 2                                         |
| 1554822_at   | 57157     | <i>PHTF2</i>     | 8.10E-03 | 1.79 | putative homeodomain transcription factor 2                                                 |
| 224973_at    | 55603     | <i>FAM46A</i>    | 7.89E-02 | 1.78 | family with sequence similarity 46, member A                                                |
| 204472_at    | 2669      | <i>GEM</i>       | 6.90E-03 | 1.78 | GTP binding protein overexpressed in skeletal muscle                                        |
| 203394_s_at  | 3280      | <i>HES1</i>      | 5.78E-02 | 1.78 | hes family bHLH transcription factor 1                                                      |
| 226164_x_at  | 57494     | <i>RIMKLB</i>    | 8.37E-02 | 1.78 | ribosomal modification protein rimK-like family member B                                    |
| 266_s_at     | 100133941 | <i>CD24</i>      | 4.13E-02 | 1.77 | CD24 molecule                                                                               |
| 228759_at    | 64764     | <i>CREB3L2</i>   | 1.74E-02 | 1.77 | cAMP responsive element binding protein 3-like 2                                            |
| 221766_s_at  | 55603     | <i>FAM46A</i>    | 4.30E-03 | 1.77 | family with sequence similarity 46, member A                                                |
| 223380_s_at  | 26524     | <i>LATS2</i>     | 1.10E-03 | 1.77 | large tumor suppressor kinase 2                                                             |
| 237724_at    | 162333    | <i>MARCH10</i>   | 5.94E-02 | 1.76 | membrane associated ring finger 10                                                          |
| 203044_at    | 22856     | <i>CHSY1</i>     | 5.00E-04 | 1.76 | chondroitin sulfate synthase 1                                                              |
| 227755_s_at  | 2081      | <i>ERN1</i>      | 1.50E-03 | 1.76 | endoplasmic reticulum to nucleus signaling 1                                                |
| 219889_at    | 10023     | <i>FRAT1</i>     | 1.05E-02 | 1.76 | frequently rearranged in advanced T-cell lymphomas 1                                        |
| 227032_at    | 5362      | <i>PLXNA2</i>    | 5.04E-02 | 1.76 | plexin A2                                                                                   |
| 204197_s_at  | 864       | <i>RUNX3</i>     | 9.90E-03 | 1.76 | runt-related transcription factor 3                                                         |
| 238029_s_at  | 151473    | <i>SLC16A14</i>  | 3.00E-03 | 1.76 | solute carrier family 16, member 14                                                         |
| 202387_at    | 573       | <i>BAG1</i>      | 7.00E-04 | 1.75 | BCL2-associated athanogene                                                                  |
| 236361_at    | 117248    | <i>GALNT15</i>   | 1.73E-02 | 1.75 | polypeptide N-acetylgalactosaminyltransferase 15                                            |
| 218469_at    | 26585     | <i>GREM1</i>     | 1.60E-03 | 1.75 | gremlin 1, DAN family BMP antagonist                                                        |
| 224569_s_at  | 359948    | <i>IRF2BP2</i>   | 3.70E-03 | 1.75 | interferon regulatory factor 2 binding protein 2                                            |
| 204684_at    | 4884      | <i>NPTX1</i>     | 6.04E-02 | 1.75 | neuronal pentraxin I                                                                        |
| 202861_at    | 5187      | <i>PER1</i>      | 2.77E-02 | 1.75 | period circadian clock 1                                                                    |
| 209771_x_at  | 100133941 | <i>CD24</i>      | 6.00E-04 | 1.74 | CD24 molecule                                                                               |
| 225978_at    | 57494     | <i>RIMKLB</i>    | 1.50E-03 | 1.74 | ribosomal modification protein rimK-like family member B                                    |
| 201418_s_at  | 6659      | <i>SOX4</i>      | 1.02E-02 | 1.74 | SRY box 4                                                                                   |
| 230824_at    | 162333    | <i>MARCH10</i>   | 1.79E-02 | 1.73 | membrane associated ring finger 10                                                          |
| 206374_at    | 1850      | <i>DUSP8</i>     | 2.83E-02 | 1.73 | dual specificity phosphatase 8                                                              |
| 218696_at    | 9451      | <i>EIF2AK3</i>   | 6.98E-02 | 1.73 | eukaryotic translation initiation factor 2-alpha kinase 3                                   |
| 201329_s_at  | 2114      | <i>ETS2</i>      | 1.50E-03 | 1.73 | v-ets avian erythroblastosis virus E26 oncogene homolog 2                                   |
| 218468_s_at  | 26585     | <i>GREM1</i>     | 9.00E-04 | 1.73 | gremlin 1, DAN family BMP antagonist                                                        |
| 226333_at    | 3570      | <i>IL6R</i>      | 4.04E-02 | 1.73 | interleukin 6 receptor                                                                      |
| 209098_s_at  | 182       | <i>JAG1</i>      | 1.89E-02 | 1.73 | jagged 1                                                                                    |
| 220266_s_at  | 9314      | <i>KLF4</i>      | 7.49E-02 | 1.73 | Kruppel-like factor 4 (gut)                                                                 |
| 206750_at    | 7975      | <i>MAFK</i>      | 2.02E-02 | 1.73 | v-maf avian musculoaponeurotic fibrosarcoma oncogene homolog K                              |
| 200730_s_at  | 7803      | <i>PTP4A1</i>    | 8.50E-03 | 1.73 | protein tyrosine phosphatase type IVA, member 1                                             |

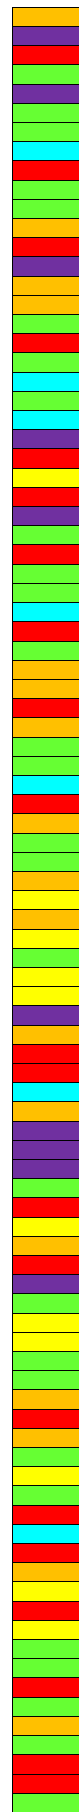



|                    |             |                     |                 |             |                                                                                               |  |
|--------------------|-------------|---------------------|-----------------|-------------|-----------------------------------------------------------------------------------------------|--|
| 203439_s_at        | 8614        | <i>STC2</i>         | 1.00E-03        | 1.73        | stanniocalcin 2                                                                               |  |
| 218182_s_at        | 9076        | <i>CLDN1</i>        | 1.06E-01        | 1.72        | claudin 1                                                                                     |  |
| 205035_s_at        | 9150        | <i>CTDP1</i>        | 1.08E-02        | 1.72        | CTD phosphatase subunit 1                                                                     |  |
| 224657_s_at        | 54206       | <i>ERRFI1</i>       | 4.10E-03        | 1.72        | ERBB receptor feedback inhibitor 1                                                            |  |
| 204011_s_at        | 10253       | <i>SPRY2</i>        | 1.69E-02        | 1.72        | sprouty RTK signaling antagonist 2                                                            |  |
| 220400_s_at        | 157680      | <i>VPS13B</i>       | 1.17E-01        | 1.72        | vacuolar protein sorting 13 homolog B (yeast)                                                 |  |
| 222549_s_at        | 9076        | <i>CLDN1</i>        | 4.70E-03        | 1.71        | claudin 1                                                                                     |  |
| 210350_x_at        | 3621        | <i>ING1</i>         | 4.14E-02        | 1.71        | inhibitor of growth family member 1                                                           |  |
| 231559_s_at        | 4837        | <i>NM1T</i>         | 1.79E-02        | 1.71        | nicotinamide N-methyltransferase                                                              |  |
| 202679_s_at        | 4864        | <i>NPC1</i>         | 3.00E-03        | 1.71        | Niemann-Pick disease, type C1                                                                 |  |
| 222662_s_at        | 79660       | <i>PPP1R3B</i>      | 3.79E-02        | 1.71        | protein phosphatase 1, regulatory subunit 3B                                                  |  |
| 239615_s_at        | 6584        | <i>SLC22A5</i>      | 6.40E-03        | 1.71        | solute carrier family 22 (organic cation/carnitine transporter), member 5                     |  |
| 209921_s_at        | 23657       | <i>SLC7A11</i>      | 6.00E-04        | 1.71        | solute carrier family 7 (anionic amino acid transporter light chain, xc- system), member 11   |  |
| 238542_s_at        | 80328       | <i>ULBP2</i>        | 1.60E-03        | 1.71        | UL16 binding protein 2                                                                        |  |
| 202628_s_at        | 5054        | <i>SERPINE1</i>     | 1.50E-03        | 1.70        | serpin peptidase inhibitor, clade E (nexin, plasminogen activator inhibitor type 1), member 1 |  |
| 213624_s_at        | 10924       | <i>SMPDL3A</i>      | 4.45E-02        | 1.70        | sphingomyelin phosphodiesterase, acid-like 3A                                                 |  |
| 213668_s_at        | 6659        | <i>SOX4</i>         | 3.35E-02        | 1.70        | SRY box 4                                                                                     |  |
| 218810_s_at        | 80149       | <i>ZC3H12A</i>      | 3.60E-02        | 1.70        | zinc finger CCCH-type containing 12A                                                          |  |
| 203973_s_at        | 1052        | <i>CEBPD</i>        | 4.00E-04        | 1.69        | CCAAT/enhancer binding protein (C/EBP), delta                                                 |  |
| 242767_s_at        | 29995       | <i>LMCD1</i>        | 1.65E-02        | 1.69        | LIM and cysteine-rich domains 1                                                               |  |
| 202431_s_at        | 4609        | <i>MYC</i>          | 3.90E-03        | 1.69        | v-myc avian myelocytomatosis viral oncogene homolog                                           |  |
| 230330_s_at        | 8493        | <i>PPM1D</i>        | 2.06E-02        | 1.69        | protein phosphatase, Mg <sup>2+</sup> /Mn <sup>2+</sup> dependent, 1D                         |  |
| 204595_s_at        | 6781        | <i>STC1</i>         | 3.52E-02        | 1.69        | stanniocalcin 1                                                                               |  |
| 221577_x_at        | 9518        | <i>GDF15</i>        | 1.00E-02        | 1.68        | growth differentiation factor 15                                                              |  |
| 201195_s_at        | 8140        | <i>SLC7A5</i>       | 2.11E-02        | 1.68        | solute carrier family 7 (amino acid transporter light chain, L system), member 5              |  |
| 202181_s_at        | 9766        | <i>SUSD6</i>        | 2.70E-03        | 1.68        | sushi domain containing 6                                                                     |  |
| 227195_s_at        | 84858       | <i>ZNF503</i>       | 1.87E-02        | 1.68        | zinc finger protein 503                                                                       |  |
| 204039_s_at        | 1050        | <i>CEBPA</i>        | 7.58E-02        | 1.67        | CCAAT/enhancer binding protein (C/EBP), alpha                                                 |  |
| 241985_s_at        | 133746      | <i>JMY</i>          | 1.37E-02        | 1.67        | junction mediating and regulatory protein, p53 cofactor                                       |  |
| 201810_s_at        | 9467        | <i>SH3BP5</i>       | 3.00E-03        | 1.67        | SH3-domain binding protein 5 (BTK-associated)                                                 |  |
| 211475_s_at        | 573         | <i>BAG1</i>         | 9.00E-04        | 1.66        | BCL2-associated athanogene                                                                    |  |
| 1552487_a_at       | 646         | <i>BNC1</i>         | 5.20E-03        | 1.66        | basonuclin 1                                                                                  |  |
| 212830_s_at        | 1955        | <i>MEGF9</i>        | 4.30E-03        | 1.66        | multiple EGF-like-domains 9                                                                   |  |
| 203438_s_at        | 8614        | <i>STC2</i>         | 2.02E-02        | 1.66        | stanniocalcin 2                                                                               |  |
| 204931_s_at        | 6943        | <i>TCF21</i>        | 3.10E-03        | 1.66        | transcription factor 21                                                                       |  |
| 209386_s_at        | 4071        | <i>TM4SF1</i>       | 7.20E-03        | 1.66        | transmembrane 4 L six family member 1                                                         |  |
| 1559140_at         | 157693      | <i>FAM87A</i>       | 7.49E-02        | 1.65        | family with sequence similarity 87, member A                                                  |  |
|                    | 400728      | <i>FAM87B</i>       |                 |             | family with sequence similarity 87, member B                                                  |  |
| 206997_s_at        | 9394        | <i>HS6ST1</i>       | 1.30E-01        | 1.65        | heparan sulfate 6-O-sulfotransferase 1                                                        |  |
| 204198_s_at        | 864         | <i>RUNX3</i>        | 2.13E-02        | 1.65        | runt-related transcription factor 3                                                           |  |
| 206511_s_at        | 10736       | <i>SIX2</i>         | 1.55E-02        | 1.65        | SIX homeobox 2                                                                                |  |
| 224126_s_at        | 84068       | <i>SLC10A7</i>      | 9.42E-02        | 1.65        | solute carrier family 10, member 7                                                            |  |
| 225615_s_at        | 126917      | <i>IFFO2</i>        | 1.04E-01        | 1.64        | intermediate filament family orphan 2                                                         |  |
| 204967_s_at        | 357         | <i>SHROOM2</i>      | 1.18E-01        | 1.64        | shroom family member 2                                                                        |  |
| 204653_s_at        | 7020        | <i>TFAP2A</i>       | 3.10E-03        | 1.64        | transcription factor AP-2 alpha (activating enhancer binding protein 2 alpha)                 |  |
| 235404_s_at        | 84159       | <i>ARID5B</i>       | 1.09E-01        | 1.63        | AT rich interactive domain 5B (MRF1-like)                                                     |  |
| 214445_s_at        | 22936       | <i>ELL2</i>         | 1.34E-01        | 1.63        | elongation factor, RNA polymerase II, 2                                                       |  |
| 209864_s_at        | 23401       | <i>FRAT2</i>        | 1.43E-02        | 1.63        | frequently rearranged in advanced T-cell lymphomas 2                                          |  |
| 204512_s_at        | 3096        | <i>HIVEP1</i>       | 9.40E-03        | 1.63        | human immunodeficiency virus type I enhancer binding protein 1                                |  |
| 212641_s_at        | 3097        | <i>HIVEP2</i>       | 2.27E-02        | 1.63        | human immunodeficiency virus type I enhancer binding protein 2                                |  |
| 225263_s_at        | 9394        | <i>HS6ST1</i>       | 9.40E-03        | 1.63        | heparan sulfate 6-O-sulfotransferase 1                                                        |  |
| 202464_s_at        | 5209        | <i>PFKFB3</i>       | 6.30E-03        | 1.63        | 6-phosphofructo-2-kinase/fructose-2,6-bisphosphatase 3                                        |  |
| 225056_s_at        | 57568       | <i>SIPA1L2</i>      | 6.39E-02        | 1.63        | signal-induced proliferation-associated 1 like 2                                              |  |
| 212614_s_at        | 84159       | <i>ARID5B</i>       | 2.20E-03        | 1.62        | AT rich interactive domain 5B (MRF1-like)                                                     |  |
| 219825_s_at        | 56603       | <i>CYP26B1</i>      | 1.48E-01        | 1.62        | cytochrome P450, family 26, subfamily B, polypeptide 1                                        |  |
| 235122_s_at        | 59269       | <i>HIVEP3</i>       | 3.98E-02        | 1.62        | human immunodeficiency virus type I enhancer binding protein 3                                |  |
| 217371_s_at        | 3600        | <i>IL15</i>         | 8.39E-02        | 1.62        | interleukin 15                                                                                |  |
| 205945_s_at        | 3570        | <i>IL6R</i>         | 1.99E-02        | 1.62        | interleukin 6 receptor                                                                        |  |
| 209808_x_at        | 3621        | <i>ING1</i>         | 5.60E-03        | 1.62        | inhibitor of growth family member 1                                                           |  |
| 33304_s_at         | 3669        | <i>ISG20</i>        | 2.93E-02        | 1.62        | interferon stimulated exonuclease gene 20kDa                                                  |  |
| 225688_s_at        | 90102       | <i>PHLDB2</i>       | 9.83E-02        | 1.62        | pleckstrin homology-like domain, family B, member 2                                           |  |
| 204286_s_at        | 5366        | <i>PMAI1P1</i>      | 9.50E-02        | 1.62        | phorbol-12-myristate-13-acetate-induced protein 1                                             |  |
| 205097_s_at        | 1836        | <i>SLC26A2</i>      | 5.20E-03        | 1.62        | solute carrier family 26 (anion exchanger), member 2                                          |  |
| 227867_s_at        | 129293      | <i>TRABD2A</i>      | 3.98E-02        | 1.62        | TraB domain containing 2A                                                                     |  |
| 210511_s_at        | 3624        | <i>INHBA</i>        | 5.57E-02        | 1.61        | inhibin beta A                                                                                |  |
| 211205_x_at        | 8394        | <i>PIP5K1A</i>      | 1.60E-02        | 1.61        | phosphatidylinositol-4-phosphate 5-kinase, type I, alpha                                      |  |
| 229344_x_at        | 57494       | <i>RIMKLB</i>       | 3.63E-02        | 1.61        | ribosomal modification protein rimk-like family member B                                      |  |
| 201417_s_at        | 6659        | <i>SOX4</i>         | 3.80E-03        | 1.61        | SRY box 4                                                                                     |  |
| 203220_s_at        | 7088        | <i>TLE1</i>         | 5.26E-02        | 1.61        | transducin-like enhancer of split 1 (E(sp1) homolog, Drosophila)                              |  |
| 243259_s_at        | 6314        | <i>ATXN7</i>        | 5.79E-02        | 1.60        | ataxin 7                                                                                      |  |
| 233506_s_at        | 9689        | <i>BZW1</i>         | 4.39E-02        | 1.60        | basic leucine zipper and W2 domains 1                                                         |  |
| 214595_s_at        | 3755        | <i>KCNG1</i>        | 5.38E-02        | 1.60        | potassium channel, voltage gated modifier subfamily G, member 1                               |  |
| 202883_s_at        | 5519        | <i>PPP2R1B</i>      | 2.33E-02        | 1.60        | protein phosphatase 2, regulatory subunit A, beta                                             |  |
| 226101_s_at        | 5581        | <i>PRKCE</i>        | 7.10E-03        | 1.60        | protein kinase C, epsilon                                                                     |  |
| 213988_s_at        | 6303        | <i>SAT1</i>         | 7.21E-02        | 1.60        | spermidine/spermine N1-acetyltransferase 1                                                    |  |
| 226492_s_at        | 80031       | <i>SEMA6D</i>       | 3.05E-02        | 1.60        | sema domain, transmembrane domain (TM), and cytoplasmic domain, (semaphorin) 6D               |  |
| 207332_s_at        | 7037        | <i>TFRC</i>         | 1.09E-02        | 1.60        | transferrin receptor                                                                          |  |
| 209387_s_at        | 4071        | <i>TM4SF1</i>       | 4.82E-02        | 1.60        | transmembrane 4 L six family member 1                                                         |  |
| 1555007_s_at       | 144406      | <i>WDR66</i>        | 2.10E-03        | 1.60        | WD repeat domain 66                                                                           |  |
| 1553096_s_at       | 10018       | <i>BCL2L11</i>      | 2.70E-02        | 1.59        | BCL2-like 11 (apoptosis facilitator)                                                          |  |
| 206581_s_at        | 646         | <i>BNC1</i>         | 5.90E-03        | 1.59        | basonuclin 1                                                                                  |  |
| 203628_s_at        | 3480        | <i>IGF1R</i>        | 2.33E-02        | 1.59        | insulin-like growth factor 1 receptor                                                         |  |
| 1554833_s_at       | 55784       | <i>MCTP2</i>        | 1.37E-02        | 1.59        | multiple C2 domains, transmembrane 2                                                          |  |
| 213963_s_at        | 8819        | <i>SAP30</i>        | 1.30E-01        | 1.59        | Sin3A associated protein 30kDa                                                                |  |
| <b>208234_x_at</b> | <b>2263</b> | <b><i>FGFR2</i></b> | <b>1.16E-01</b> | <b>1.58</b> | <b>fibroblast growth factor receptor 2</b>                                                    |  |
| 202838_s_at        | 2517        | <i>FUCA1</i>        | 6.90E-03        | 1.58        | fucosidase, alpha-L-1, tissue                                                                 |  |
| 205227_s_at        | 3556        | <i>IL1RAP</i>       | 3.40E-02        | 1.58        | interleukin 1 receptor accessory protein                                                      |  |
| 219657_s_at        | 51274       | <i>KLF3</i>         | 5.04E-02        | 1.58        | Kruppel-like factor 3 (basic)                                                                 |  |
| 229092_s_at        | 7026        | <i>NR2F2</i>        | 9.40E-03        | 1.58        | nuclear receptor subfamily 2, group F, member 2                                               |  |
| 202886_s_at        | 5519        | <i>PPP2R1B</i>      | 3.98E-02        | 1.58        | protein phosphatase 2, regulatory subunit A, beta                                             |  |
| 237215_s_at        | 7037        | <i>TFRC</i>         | 1.11E-01        | 1.58        | transferrin receptor                                                                          |  |
| 228404_s_at        | 153572      | <i>IRX2</i>         | 1.39E-01        | 1.57        | iroquois homeobox 2                                                                           |  |
| 212272_s_at        | 23175       | <i>LPIN1</i>        | 6.14E-02        | 1.57        | lipin 1                                                                                       |  |
| 209758_s_at        | 8076        | <i>MFAP5</i>        | 3.33E-02        | 1.57        | microfibrillar associated protein 5                                                           |  |

|              |           |                     |          |      |                                                                                    |  |
|--------------|-----------|---------------------|----------|------|------------------------------------------------------------------------------------|--|
| 202238_s_at  | 4837      | <i>NNMT</i>         | 1.05E-02 | 1.57 | nicotinamide N-methyltransferase                                                   |  |
| 36829_at     | 5187      | <i>PER1</i>         | 6.70E-03 | 1.57 | period circadian clock 1                                                           |  |
| 216074_x_at  | 23286     | <i>WWC1</i>         | 1.21E-02 | 1.57 | WW and C2 domain containing 1                                                      |  |
| 241969_at    | 84159     | <i>ARID5B</i>       | 8.15E-02 | 1.56 | AT rich interactive domain 5B (MRF1-like)                                          |  |
| 200920_s_at  | 694       | <i>BTG1</i>         | 5.60E-03 | 1.56 | B-cell translocation gene 1, anti-proliferative                                    |  |
| 1553134_s_at | 203228    | <i>C9orf72</i>      | 8.79E-02 | 1.56 | chromosome 9 open reading frame 72                                                 |  |
| 224822_at    | 10395     | <i>DLC1</i>         | 4.00E-03 | 1.56 | DLC1 Rho GTPase activating protein                                                 |  |
| 222866_s_at  | 55640     | <i>FLVCR2</i>       | 1.17E-02 | 1.56 | feline leukemia virus subgroup C cellular receptor family, member 2                |  |
| 230492_s_at  | 56261     | <i>GPCPD1</i>       | 6.02E-02 | 1.56 | glycerophosphocholine phosphodiesterase 1                                          |  |
| 212642_s_at  | 3097      | <i>HIVEP2</i>       | 1.19E-02 | 1.56 | human immunodeficiency virus type I enhancer binding protein 2                     |  |
| 204952_at    | 27076     | <i>LYPD3</i>        | 1.04E-01 | 1.56 | LY6/PLAUR domain containing 3                                                      |  |
| 223218_s_at  | 64332     | <i>NFKBIZ</i>       | 1.27E-01 | 1.56 | nuclear factor of kappa light polypeptide gene enhancer in B-cells inhibitor, zeta |  |
| 201811_x_at  | 9467      | <i>SH3BP5</i>       | 2.90E-03 | 1.56 | SH3-domain binding protein 5 (BTK-associated)                                      |  |
| 228181_at    | 7779      | <i>SLC30A1</i>      | 1.08E-01 | 1.56 | solute carrier family 30 (zinc transporter), member 1                              |  |
| 203221_at    | 7088      | <i>TLE1</i>         | 3.05E-02 | 1.56 | transducin-like enhancer of split 1 (E(sp1) homolog, Drosophila)                   |  |
| 224978_s_at  | 57602     | <i>USP36</i>        | 9.13E-02 | 1.56 | ubiquitin specific peptidase 36                                                    |  |
| 226982_at    | 22936     | <i>ELL2</i>         | 2.12E-02 | 1.55 | elongation factor, RNA polymerase II, 2                                            |  |
| 200879_s_at  | 2034      | <i>EPAS1</i>        | 1.09E-01 | 1.55 | endothelial PAS domain protein 1                                                   |  |
| 214212_x_at  | 10979     | <i>FERMT2</i>       | 1.64E-02 | 1.55 | fermitin family member 2                                                           |  |
| 243358_at    | 3480      | <i>IGF1R</i>        | 4.20E-03 | 1.55 | insulin-like growth factor 1 receptor                                              |  |
| 217489_s_at  | 3570      | <i>IL6R</i>         | 1.34E-01 | 1.55 | interleukin 6 receptor                                                             |  |
| 203542_s_at  | 687       | <i>KLF9</i>         | 2.90E-03 | 1.55 | Kruppel-like factor 9                                                              |  |
| 226844_at    | 79817     | <i>MOB3B</i>        | 6.55E-02 | 1.55 | MOB kinase activator 3B                                                            |  |
| 238919_at    | 5101      | <i>PCDH9</i>        | 1.46E-01 | 1.55 | protocadherin 9                                                                    |  |
| 204285_s_at  | 5366      | <i>PMAI1P1</i>      | 2.30E-02 | 1.55 | phorbol-12-myristate-13-acetate-induced protein 1                                  |  |
| 213280_at    | 23108     | <i>RAP1GAP2</i>     | 6.00E-03 | 1.55 | RAP1 GTPase activating protein 2                                                   |  |
| 220924_s_at  | 54407     | <i>SLC38A2</i>      | 1.30E-03 | 1.55 | solute carrier family 38, member 2                                                 |  |
| 225033_at    | 6482      | <i>ST3GAL1</i>      | 4.92E-02 | 1.55 | ST3 beta-galactoside alpha-2,3-sialyltransferase 1                                 |  |
| 204596_s_at  | 6781      | <i>STC1</i>         | 8.05E-02 | 1.55 | stanniocalcin 1                                                                    |  |
| 202644_s_at  | 7128      | <i>TNFAIP3</i>      | 7.49E-02 | 1.55 | tumor necrosis factor, alpha-induced protein 3                                     |  |
| 209946_at    | 7424      | <i>VEGFC</i>        | 1.51E-02 | 1.55 | vascular endothelial growth factor C                                               |  |
| 209964_s_at  | 6314      | <i>ATXN7</i>        | 1.17E-01 | 1.54 | ataxin 7                                                                           |  |
| 214014_at    | 10435     | <i>CDC42EP2</i>     | 2.21E-02 | 1.54 | CDC42 effector protein (Rho GTPase binding) 2                                      |  |
| 208072_s_at  | 8527      | <i>DGKD</i>         | 1.62E-02 | 1.54 | diacylglycerol kinase, delta 130kDa                                                |  |
| 1554966_a_at | 11259     | <i>FILIP1L</i>      | 2.75E-02 | 1.54 | filamin A interacting protein 1-like                                               |  |
| 230788_at    | 2651      | <i>GCNT2</i>        | 1.74E-02 | 1.54 | glucosaminyl (N-acetyl) transferase 2, I-branching enzyme (I blood group)          |  |
| 203821_at    | 1839      | <i>HBEGF</i>        | 7.30E-03 | 1.54 | heparin-binding EGF-like growth factor                                             |  |
| 208960_s_at  | 1316      | <i>KLF6</i>         | 2.30E-03 | 1.54 | Kruppel-like factor 6                                                              |  |
| 210805_x_at  | 861       | <i>RUNX1</i>        | 8.70E-03 | 1.54 | runt-related transcription factor 1                                                |  |
|              | 100506403 | <i>LOC100506403</i> |          |      | uncharacterized LOC100506403                                                       |  |
| 202896_s_at  | 140885    | <i>SIRPA</i>        | 1.09E-02 | 1.54 | signal-regulatory protein alpha                                                    |  |
| 212290_at    | 6541      | <i>SLC7A1</i>       | 6.23E-02 | 1.54 | solute carrier family 7 (cationic amino acid transporter, y+ system), member 1     |  |
| 221291_at    | 80328     | <i>ULBP2</i>        | 3.12E-02 | 1.54 | UL16 binding protein 2                                                             |  |
| 236557_at    | 253461    | <i>ZBTB38</i>       | 2.75E-02 | 1.54 | zinc finger and BTB domain containing 38                                           |  |
| 218865_at    | 64757     | <i>MARCK3</i>       | 5.90E-03 | 1.53 | mitochondrial amidoxime reducing component 1                                       |  |
| 212974_at    | 22898     | <i>DENN3</i>        | 1.23E-01 | 1.53 | DENN/MADD domain containing 3                                                      |  |
| 203592_s_at  | 10272     | <i>FSTL3</i>        | 7.79E-02 | 1.53 | folliculin-like 3 (secreted glycoprotein)                                          |  |
| 203097_s_at  | 9693      | <i>RAPGEF2</i>      | 2.30E-03 | 1.53 | Rap guanine nucleotide exchange factor 2                                           |  |
| 203096_s_at  | 9693      | <i>RAPGEF2</i>      | 1.59E-02 | 1.53 | Rap guanine nucleotide exchange factor 2                                           |  |
| 209481_at    | 54861     | <i>SNRK</i>         | 3.00E-03 | 1.53 | SNF related kinase                                                                 |  |
| 203759_at    | 6484      | <i>ST3GAL4</i>      | 2.19E-02 | 1.53 | ST3 beta-galactoside alpha-2,3-sialyltransferase 4                                 |  |
| 205990_s_at  | 7474      | <i>WNT5A</i>        | 2.83E-02 | 1.53 | wingless-type MMTV integration site family, member 5A                              |  |
| 210517_s_at  | 9590      | <i>AKAP12</i>       | 1.14E-02 | 1.52 | A kinase (PKA) anchor protein 12                                                   |  |
| 201508_at    | 3487      | <i>IGFBP4</i>       | 3.82E-02 | 1.52 | insulin like growth factor binding protein 4                                       |  |
| 208415_x_at  | 3621      | <i>ING1</i>         | 8.80E-03 | 1.52 | inhibitor of growth family member 1                                                |  |
| 231849_at    | 144501    | <i>KRT80</i>        | 8.60E-03 | 1.52 | keratin 80, type II                                                                |  |
| 212823_s_at  | 26030     | <i>PLEKHG3</i>      | 6.70E-02 | 1.52 | pleckstrin homology domain containing, family G (with RhoGef domain) member 3      |  |
| 227093_at    | 57602     | <i>USP36</i>        | 1.17E-01 | 1.52 | ubiquitin specific peptidase 36                                                    |  |
| 241950_at    | 23286     | <i>WWC1</i>         | 1.27E-01 | 1.52 | WW and C2 domain containing 1                                                      |  |
| 210762_s_at  | 10395     | <i>DLC1</i>         | 8.60E-03 | 1.51 | DLC1 Rho GTPase activating protein                                                 |  |
| 203627_at    | 3480      | <i>IGF1R</i>        | 6.88E-02 | 1.51 | insulin-like growth factor 1 receptor                                              |  |
| 233487_s_at  | 56262     | <i>LRRRC8A</i>      | 6.00E-03 | 1.51 | leucine rich repeat containing 8 family, member A                                  |  |
| 210845_s_at  | 5329      | <i>PLAUR</i>        | 4.00E-03 | 1.51 | plasminogen activator, urokinase receptor                                          |  |
| 216049_at    | 22836     | <i>RHOBTB3</i>      | 6.50E-02 | 1.51 | Rho-related BTB domain containing 3                                                |  |
| 226563_at    | 4087      | <i>SMAD2</i>        | 3.93E-02 | 1.51 | SMAD family member 2                                                               |  |
| 235598_at    | 4087      | <i>SMAD2</i>        | 6.82E-02 | 1.51 | SMAD family member 2                                                               |  |
| 213873_at    | 10402     | <i>ST3GAL6</i>      | 7.38E-02 | 1.51 | ST3 beta-galactoside alpha-2,3-sialyltransferase 6                                 |  |
| 229812_at    | 84196     | <i>USP48</i>        | 4.92E-02 | 1.51 | ubiquitin specific peptidase 48                                                    |  |

**Indacaterol (6h)**  
**(320 Probe Sets = 205 Gene IDs)**

| Affy Probe Set ID* | Entrez Gene ID | Official Gene Symbol   | FDR P-Value     | Fold change | UniGene Name                                                    | Function |
|--------------------|----------------|------------------------|-----------------|-------------|-----------------------------------------------------------------|----------|
| 209959_at          | 8013           | <i>NR4A3</i>           | 5.00E-04        | 14.13       | nuclear receptor subfamily 4, group A, member 3                 |          |
| <b>221541_at</b>   | <b>83716</b>   | <b><i>CRISPLD2</i></b> | <b>5.31E-08</b> | <b>8.05</b> | <b>cysteine-rich secretory protein LCCL domain containing 2</b> |          |
| 1565657_at         | 54918          | <i>CMTM6</i>           | 9.35E-02        | 6.78        | CKLF-like MARVEL transmembrane domain containing 6              |          |
| 219049_at          | 55790          | <i>CSGALNACT1</i>      | 3.00E-04        | 6.58        | chondroitin sulfate N-acetylgalactosaminyltransferase 1         |          |
| 228128_x_at        | 5069           | <i>PAPPA</i>           | 1.00E-04        | 6.16        | pregnancy-associated plasma protein A, pappalysin 1             |          |
| 222784_at          | 64093          | <i>SMOC1</i>           | 1.00E-04        | 5.62        | SPARC related modular calcium binding 1                         |          |
| <b>225207_at</b>   | <b>5166</b>    | <b><i>PDK4</i></b>     | <b>7.00E-04</b> | <b>5.41</b> | <b>pyruvate dehydrogenase kinase, isozyme 4</b>                 |          |
| 239461_at          | 117248         | <i>GALNT15</i>         | 4.05E-02        | 5.02        | polypeptide N-acetylgalactosaminyltransferase 15                |          |
| 222783_s_at        | 64093          | <i>SMOC1</i>           | 1.00E-04        | 4.93        | SPARC related modular calcium binding 1                         |          |
| 243438_at          | 27115          | <i>PDE7B</i>           | 8.50E-03        | 4.85        | phosphodiesterase 7B                                            |          |
| 205421_at          | 6581           | <i>SLC22A3</i>         | 5.51E-02        | 4.77        | solute carrier family 22 (organic cation transporter), member 3 |          |
| 1556185_a_at       | 79689          | <i>STEAP4</i>          | 5.00E-04        | 4.73        | STEAP family member 4                                           |          |
| 224942_at          | 5069           | <i>PAPPA</i>           | 3.00E-04        | 4.69        | pregnancy-associated plasma protein A, pappalysin 1             |          |
| 224940_s_at        | 5069           | <i>PAPPA</i>           | 3.00E-04        | 4.68        | pregnancy-associated plasma protein A, pappalysin 1             |          |
| <b>203638_s_at</b> | <b>2263</b>    | <b><i>FGFR2</i></b>    | <b>1.40E-03</b> | <b>4.65</b> | <b>fibroblast growth factor receptor 2</b>                      |          |
| 224941_at          | 5069           | <i>PAPPA</i>           | 5.00E-04        | 4.64        | pregnancy-associated plasma protein A, pappalysin 1             |          |
| <b>228962_at</b>   | <b>5144</b>    | <b><i>PDE4D</i></b>    | <b>1.30E-03</b> | <b>4.51</b> | <b>phosphodiesterase 4D, cAMP-specific</b>                      |          |
| 230109_at          | 27115          | <i>PDE7B</i>           | 3.00E-04        | 4.31        | phosphodiesterase 7B                                            |          |
| 201981_at          | 5069           | <i>PAPPA</i>           | 7.00E-04        | 4.10        | pregnancy-associated plasma protein A, pappalysin 1             |          |
| 238649_at          | 26207          | <i>PITPNC1</i>         | 2.20E-03        | 4.10        | phosphatidylinositol transfer protein, cytoplasmic 1            |          |



|                    |             |                         |                 |             |                                                                                            |  |
|--------------------|-------------|-------------------------|-----------------|-------------|--------------------------------------------------------------------------------------------|--|
| 228501_at          | 117248      | <i>GALNT15</i>          | 1.60E-03        | 4.02        | polypeptide N-acetylgalactosaminyltransferase 15                                           |  |
| 203549_s_at        | 4023        | <i>LPL</i>              | 3.00E-04        | 3.99        | lipoprotein lipase                                                                         |  |
| <b>211401_s_at</b> | <b>2263</b> | <b><i>FGFR2</i></b>     | <b>4.96E-02</b> | <b>3.85</b> | <b>fibroblast growth factor receptor 2</b>                                                 |  |
| 203548_s_at        | 4023        | <i>LPL</i>              | 1.00E-03        | 3.82        | lipoprotein lipase                                                                         |  |
| 213050_at          | 23242       | <i>COBL</i>             | 5.00E-04        | 3.79        | cordón-bleu WH2 repeat protein                                                             |  |
| <b>220088_at</b>   | <b>728</b>  | <b><i>CSAR1</i></b>     | <b>9.00E-04</b> | <b>3.65</b> | <b>complement component 5a receptor 1</b>                                                  |  |
| 225987_at          | 79689       | <i>STEAP4</i>           | 3.00E-04        | 3.44        | STEAP family member 4                                                                      |  |
| 211119_at          | 2100        | <i>ESR2</i>             | 3.77E-02        | 3.44        | estrogen receptor 2 (ER beta)                                                              |  |
| 236361_at          | 117248      | <i>GALNT15</i>          | 6.20E-03        | 3.41        | polypeptide N-acetylgalactosaminyltransferase 15                                           |  |
| 237804_at          | 8701        | <i>DNAH11</i>           | 4.79E-02        | 3.41        | dynein, axonemal, heavy chain 11                                                           |  |
| <b>205960_at</b>   | <b>5166</b> | <b><i>PDK4</i></b>      | <b>2.24E-02</b> | <b>3.40</b> | <b>pyruvate dehydrogenase kinase, isozyme 4</b>                                            |  |
| 229709_at          | 483         | <i>ATP1B3</i>           | 8.00E-03        | 3.39        | ATPase, Na <sup>+</sup> /K <sup>+</sup> transporting, beta 3 polypeptide                   |  |
| <b>216248_s_at</b> | <b>4929</b> | <b><i>NR4A2</i></b>     | <b>6.53E-02</b> | <b>3.39</b> | <b>nuclear receptor subfamily 4, group A, member 2</b>                                     |  |
| 225516_at          | 6542        | <i>SLC7A2</i>           | 1.00E-04        | 3.33        | solute carrier family 7 (cationic amino acid transporter, y <sup>+</sup> system), member 2 |  |
| 208606_s_at        | 54361       | <i>WNT4</i>             | 6.96E-02        | 3.27        | wingless-type MMTV integration site family, member 4                                       |  |
| 213182_x_at        | 1028        | <i>CDKN1C</i>           | 3.10E-03        | 3.14        | cyclin-dependent kinase inhibitor 1C (p57, Kip2)                                           |  |
| 205501_at          | 10846       | <i>PDE10A</i>           | 5.43E-05        | 3.00        | phosphodiesterase 10A                                                                      |  |
| 220540_at          | 60598       | <i>KCNK15</i>           | 2.79E-02        | 2.93        | potassium channel, two pore domain subfamily K, member 15                                  |  |
| 219093_at          | 55022       | <i>PID1</i>             | 3.90E-03        | 2.86        | phosphotyrosine interaction domain containing 1                                            |  |
| <b>204491_at</b>   | <b>5144</b> | <b><i>PDE4D</i></b>     | <b>1.03E-02</b> | <b>2.82</b> | <b>phosphodiesterase 4D, cAMP-specific</b>                                                 |  |
| 219534_x_at        | 1028        | <i>CDKN1C</i>           | 1.40E-03        | 2.75        | cyclin-dependent kinase inhibitor 1C (p57, Kip2)                                           |  |
| 216894_x_at        | 1028        | <i>CDKN1C</i>           | 3.00E-04        | 2.74        | cyclin-dependent kinase inhibitor 1C (p57, Kip2)                                           |  |
| 213348_at          | 1028        | <i>CDKN1C</i>           | 9.00E-04        | 2.73        | cyclin-dependent kinase inhibitor 1C (p57, Kip2)                                           |  |
| 220187_at          | 79689       | <i>STEAP4</i>           | 7.00E-04        | 2.70        | STEAP family member 4                                                                      |  |
| 223484_at          | 84419       | <i>C15orf48</i>         | 9.39E-02        | 2.69        | chromosome 15 open reading frame 48                                                        |  |
| 239650_at          | 344148      | <i>NCKAP5</i>           | 1.11E-02        | 2.68        | NCK-associated protein 5                                                                   |  |
| 237939_at          | 2044        | <i>EPHA5</i>            | 3.00E-04        | 2.64        | EPH receptor A5                                                                            |  |
| 230748_at          | 9120        | <i>SLC16A6</i>          | 1.63E-02        | 2.55        | solute carrier family 16, member 6                                                         |  |
| 207038_at          | 9120        | <i>SLC16A6</i>          | 1.72E-02        | 2.49        | solute carrier family 16, member 6                                                         |  |
| 222015_at          | 1454        | <i>CSNK1E</i>           | 5.00E-04        | 2.45        | casein kinase 1, epsilon                                                                   |  |
|                    | 102800317   | <i>LOC400927-CSNK1E</i> |                 |             | LOC400927-CSNK1E readthrough                                                               |  |
| 216627_s_at        | 2683        | <i>B4GALT1</i>          | 2.40E-03        | 2.44        | UDP-Gal:betaGlcNAc beta 1,4-galactosyltransferase, polypeptide 1                           |  |
| 210102_at          | 4013        | <i>VWASA</i>            | 2.93E-02        | 2.41        | von Willebrand factor A domain containing 5A                                               |  |
| 229093_at          | 4846        | <i>NOS3</i>             | 6.78E-02        | 2.38        | nitric oxide synthase 3                                                                    |  |
| 228132_at          | 84448       | <i>ABLIM2</i>           | 3.00E-04        | 2.36        | actin binding LIM protein family, member 2                                                 |  |
| 236300_at          | 5139        | <i>PDE3A</i>            | 1.30E-03        | 2.35        | phosphodiesterase 3A, cGMP-inhibited                                                       |  |
| 238029_s_at        | 151473      | <i>SLC16A14</i>         | 1.90E-03        | 2.35        | solute carrier family 16, member 14                                                        |  |
| <b>210836_x_at</b> | <b>5144</b> | <b><i>PDE4D</i></b>     | <b>1.06E-02</b> | <b>2.35</b> | <b>phosphodiesterase 4D, cAMP-specific</b>                                                 |  |
| 1555007_s_at       | 144406      | <i>WDR66</i>            | 3.00E-04        | 2.34        | WD repeat domain 66                                                                        |  |
| 228507_at          | 5139        | <i>PDE3A</i>            | 2.20E-03        | 2.34        | phosphodiesterase 3A, cGMP-inhibited                                                       |  |
| <b>208228_s_at</b> | <b>2263</b> | <b><i>FGFR2</i></b>     | <b>2.60E-03</b> | <b>2.32</b> | <b>fibroblast growth factor receptor 2</b>                                                 |  |
| <b>209583_s_at</b> | <b>4345</b> | <b><i>CD200</i></b>     | <b>2.80E-03</b> | <b>2.32</b> | <b>CD200 molecule</b>                                                                      |  |
| 229414_at          | 26207       | <i>PITPNC1</i>          | 3.25E-02        | 2.32        | phosphatidylinositol transfer protein, cytoplasmic 1                                       |  |
| 1553199_at         | 138009      | <i>DCAF4L2</i>          | 6.02E-02        | 2.31        | DDB1 and CUL4 associated factor 4-like 2                                                   |  |
| 224071_at          | 50604       | <i>IL20</i>             | 6.00E-02        | 2.30        | interleukin 20                                                                             |  |
| 225978_at          | 57494       | <i>RIMKL8</i>           | 3.00E-04        | 2.29        | ribosomal modification protein rimk-like family member B                                   |  |
| 1555006_at         | 144406      | <i>WDR66</i>            | 1.11E-02        | 2.28        | WD repeat domain 66                                                                        |  |
| 221305_s_at        | 54576       | <i>UGT1A8</i>           |                 |             | UDP glucuronosyltransferase 1 family, polypeptide A8                                       |  |
|                    | 54600       | <i>UGT1A9</i>           | 9.20E-02        | 2.27        | UDP glucuronosyltransferase 1 family, polypeptide A9                                       |  |
| 229552_at          | 8739        | <i>HRK</i>              | 1.20E-03        | 2.24        | harakiri, BCL2 interacting protein                                                         |  |
|                    | 283454      | <i>LOC283454</i>        |                 |             | uncharacterized LOC283454                                                                  |  |
| 208425_s_at        | 26115       | <i>TANC2</i>            | 1.20E-03        | 2.24        | tetratricopeptide repeat, ankyrin repeat and coiled-coil containing 2                      |  |
| <b>209582_s_at</b> | <b>4345</b> | <b><i>CD200</i></b>     | <b>1.20E-03</b> | <b>2.22</b> | <b>CD200 molecule</b>                                                                      |  |
| 232267_at          | 283383      | <i>ADGRD1</i>           | 8.60E-03        | 2.22        | adhesion G protein-coupled receptor D1                                                     |  |
| 206616_s_at        | 53616       | <i>ADAM22</i>           | 2.07E-02        | 2.22        | ADAM metalloproteinase domain 22                                                           |  |
| 1552736_a_at       | 81832       | <i>NETO1</i>            | 3.00E-04        | 2.21        | neuropilin (NRP) and tolloid (TLL)-like 1                                                  |  |
| 1554199_at         | 5800        | <i>PTPRO</i>            | 4.44E-02        | 2.20        | protein tyrosine phosphatase, receptor type, O                                             |  |
| 218177_at          | 57132       | <i>CHMP1B</i>           | 2.94E-02        | 2.18        | charged multivesicular body protein 1B                                                     |  |
| 205003_at          | 9732        | <i>DOCK4</i>            | 1.92E-02        | 2.17        | dedicator of cytokinesis 4                                                                 |  |
| 227099_s_at        | 387763      | <i>C11orf96</i>         | 1.80E-03        | 2.16        | chromosome 11 open reading frame 96                                                        |  |
| 206389_s_at        | 5139        | <i>PDE3A</i>            | 2.40E-03        | 2.16        | phosphodiesterase 3A, cGMP-inhibited                                                       |  |
| 209772_s_at        | 100133941   | <i>CD24</i>             | 1.00E-04        | 2.15        | CD24 molecule                                                                              |  |
| 206356_s_at        | 2774        | <i>GNAL</i>             | 1.20E-03        | 2.15        | guanine nucleotide binding protein, alpha activating activity polypeptide, olfactory type  |  |
| 218589_at          | 10161       | <i>LPAR6</i>            | 1.13E-02        | 2.15        | lysophosphatidic acid receptor 6                                                           |  |
| 228325_at          | 23514       | <i>SPDR</i>             | 4.55E-02        | 2.15        | scaffolding protein involved in DNA repair                                                 |  |
| 235367_at          | 84665       | <i>MYPN</i>             | 9.00E-04        | 2.13        | myopalladin                                                                                |  |
| 213006_at          | 1052        | <i>CEBPD</i>            | 7.22E-02        | 2.13        | CCAAT/enhancer binding protein (C/EBP), delta                                              |  |
| 224952_at          | 26115       | <i>TANC2</i>            | 3.00E-04        | 2.12        | tetratricopeptide repeat, ankyrin repeat and coiled-coil containing 2                      |  |
| 203628_at          | 3480        | <i>IGF1R</i>            | 9.00E-04        | 2.10        | insulin-like growth factor 1 receptor                                                      |  |
| 213436_at          | 1268        | <i>CNR1</i>             | 1.30E-03        | 2.10        | cannabinoid receptor 1 (brain)                                                             |  |
| 218865_at          | 64757       | <i>MARC1</i>            | 3.00E-04        | 2.09        | mitochondrial amidoxime reducing component 1                                               |  |
| 207626_s_at        | 6542        | <i>SLC7A2</i>           | 1.55E-02        | 2.09        | solute carrier family 7 (cationic amino acid transporter, y <sup>+</sup> system), member 2 |  |
| 220335_x_at        | 23491       | <i>CES3</i>             | 3.00E-04        | 2.08        | carboxylesterase 3                                                                         |  |
| 205157_s_at        | 3872        | <i>KRT17</i>            | 1.63E-02        | 2.08        | keratin 17, type I                                                                         |  |
| 230398_at          | 84951       | <i>TNS4</i>             | 4.36E-02        | 2.07        | tensin 4                                                                                   |  |
| 205896_at          | 6583        | <i>SLC22A4</i>          | 9.20E-03        | 2.06        | solute carrier family 22 (organic cation/zwitterion transporter), member 4                 |  |
| 208078_s_at        | 150094      | <i>SIK1</i>             | 7.78E-02        | 2.06        | salt-inducible kinase 1                                                                    |  |
|                    | 102724428   | <i>LOC102724428</i>     |                 |             | serine/threonine-protein kinase SIK1                                                       |  |
| 208651_x_at        | 100133941   | <i>CD24</i>             | 2.05E-02        | 2.05        | CD24 molecule                                                                              |  |
| 1568949_at         | 26207       | <i>PITPNC1</i>          | 8.20E-03        | 2.03        | phosphatidylinositol transfer protein, cytoplasmic 1                                       |  |
| <b>206359_at</b>   | <b>9021</b> | <b><i>SOC33</i></b>     | <b>4.68E-02</b> | <b>2.03</b> | <b>suppressor of cytokine signaling 3</b>                                                  |  |
| 207430_s_at        | 4477        | <i>MSMB</i>             | 9.32E-02        | 2.03        | microseminoprotein, beta-                                                                  |  |
| 208650_s_at        | 100133941   | <i>CD24</i>             | 8.00E-03        | 2.02        | CD24 molecule                                                                              |  |
| 201810_s_at        | 9467        | <i>SH3BP5</i>           | 1.20E-03        | 2.01        | SH3-domain binding protein 5 (BTK-associated)                                              |  |
| 226858_at          | 1454        | <i>CSNK1E</i>           | 5.00E-04        | 2.00        | casein kinase 1, epsilon                                                                   |  |
|                    | 102800317   | <i>LOC400927-CSNK1E</i> |                 |             | LOC400927-CSNK1E readthrough                                                               |  |
| 224963_at          | 1836        | <i>SLC26A2</i>          | 9.00E-04        | 2.00        | solute carrier family 26 (anion exchanger), member 2                                       |  |
| 236440_at          | 81832       | <i>NETO1</i>            | 1.30E-03        | 2.00        | neuropilin (NRP) and tolloid (TLL)-like 1                                                  |  |
| 211631_x_at        | 2683        | <i>B4GALT1</i>          | 3.50E-03        | 1.99        | UDP-Gal:betaGlcNAc beta 1,4-galactosyltransferase, polypeptide 1                           |  |
| 206864_s_at        | 8739        | <i>HRK</i>              | 3.00E-04        | 1.98        | harakiri, BCL2 interacting protein                                                         |  |
| 236087_at          | 84448       | <i>ABLIM2</i>           | 1.20E-03        | 1.98        | actin binding LIM protein family, member 2                                                 |  |
| 266_s_at           | 100133941   | <i>CD24</i>             | 2.84E-02        | 1.98        | CD24 molecule                                                                              |  |
| <b>210837_s_at</b> | <b>5144</b> | <b><i>PDE4D</i></b>     | <b>7.29E-02</b> | <b>1.98</b> | <b>phosphodiesterase 4D, cAMP-specific</b>                                                 |  |
| 237724_at          | 162333      | <i>MARCH10</i>          | 2.61E-02        | 1.97        | membrane associated ring finger 10                                                         |  |

|                    |             |                     |                 |             |                                                                                             |  |
|--------------------|-------------|---------------------|-----------------|-------------|---------------------------------------------------------------------------------------------|--|
| 206388_at          | 5139        | <i>PDE3A</i>        | 5.00E-04        | 1.96        | phosphodiesterase 3A, cGMP-inhibited                                                        |  |
| 226865_at          | 84898       | <i>PLXDC2</i>       | 1.40E-03        | 1.96        | plexin domain containing 2                                                                  |  |
| 242444_at          | 114904      | <i>CIQTNF6</i>      | 1.31E-02        | 1.96        | C1q and tumor necrosis factor related protein 6                                             |  |
| 238919_at          | 5101        | <i>PCDH9</i>        | 3.88E-02        | 1.95        | protocadherin 9                                                                             |  |
| 200731_s_at        | 7803        | <i>PTP4A1</i>       | 5.85E-02        | 1.95        | protein tyrosine phosphatase type IVA, member 1                                             |  |
| 224393_s_at        | 27439       | <i>TMEM121B</i>     | 8.80E-02        | 1.95        | transmembrane Protein 121B                                                                  |  |
| 225728_at          | 8470        | <i>SORBS2</i>       | 1.57E-02        | 1.94        | sorbin and SH3 domain containing 2                                                          |  |
| 203627_at          | 3480        | <i>IGF1R</i>        | 9.00E-04        | 1.93        | insulin-like growth factor 1 receptor                                                       |  |
| 213438_at          | 23114       | <i>NFASC</i>        | 1.30E-03        | 1.93        | neurofascin                                                                                 |  |
| 215703_at          | 1080        | <i>CFTR</i>         | 8.96E-02        | 1.92        | cystic fibrosis transmembrane conductance regulator                                         |  |
| 213765_at          | 8076        | <i>MFAP5</i>        | 1.20E-03        | 1.91        | microfibrillar associated protein 5                                                         |  |
| 202952_s_at        | 8038        | <i>ADAM12</i>       | 3.00E-04        | 1.90        | ADAM metalloproteinase domain 12                                                            |  |
| 220343_at          | 27115       | <i>PDE7B</i>        | 3.00E-04        | 1.89        | phosphodiesterase 7B                                                                        |  |
| 214807_at          | 84898       | <i>PLXDC2</i>       | 1.63E-02        | 1.89        | plexin domain containing 2                                                                  |  |
| 219155_at          | 26207       | <i>PITPNC1</i>      | 1.93E-02        | 1.89        | phosphatidylinositol transfer protein, cytoplasmic 1                                        |  |
| 206865_at          | 8739        | <i>HRK</i>          | 3.31E-02        | 1.89        | harakiri, BCL2 interacting protein                                                          |  |
| 155997_x_at        | 201191      | <i>SAMD14</i>       | 6.77E-02        | 1.89        | sterile alpha motif domain containing 14                                                    |  |
| 216379_x_at        | 100133941   | <i>CD24</i>         | 3.10E-03        | 1.88        | CD24 molecule                                                                               |  |
| 210397_at          | 1672        | <i>DEFB1</i>        | 7.30E-03        | 1.88        | defensin, beta 1                                                                            |  |
| 228964_at          | 639         | <i>PRDM1</i>        | 1.71E-02        | 1.88        | PR domain containing 1, with ZNF domain                                                     |  |
| 225330_at          | 3480        | <i>IGF1R</i>        | 4.50E-02        | 1.88        | insulin-like growth factor 1 receptor                                                       |  |
| 214595_at          | 3755        | <i>KCNJ1</i>        | 7.60E-03        | 1.87        | potassium channel, voltage gated modifier subfamily G, member 1                             |  |
| 223571_at          | 114904      | <i>CIQTNF6</i>      | 1.35E-02        | 1.87        | C1q and tumor necrosis factor related protein 6                                             |  |
| 226614_s_at        | 83648       | <i>FAM167A</i>      | 3.00E-04        | 1.86        | family with sequence similarity 167, member A                                               |  |
| 213924_at          | 2774        | <i>GNAL</i>         | 8.20E-03        | 1.86        | guanine nucleotide binding protein, alpha activating activity polypeptide, olfactory type   |  |
| 213764_s_at        | 8076        | <i>MFAP5</i>        | 1.82E-02        | 1.86        | microfibrillar associated protein 5                                                         |  |
| 221272_s_at        | 81563       | <i>C1orf21</i>      | 3.20E-03        | 1.85        | chromosome 1 open reading frame 21                                                          |  |
| 242162_at          | 164781      | <i>DAWI</i>         | 8.60E-03        | 1.85        | dynein assembly factor with WDR repeat domains 1                                            |  |
| 237187_at          | 8739        | <i>HRK</i>          | 9.00E-04        | 1.84        | harakiri, BCL2 interacting protein                                                          |  |
| 227529_s_at        | 9590        | <i>AKAP12</i>       | 1.72E-02        | 1.84        | A kinase (PRKA) anchor protein 12                                                           |  |
| 227276_at          | 84898       | <i>PLXDC2</i>       | 1.30E-03        | 1.83        | plexin domain containing 2                                                                  |  |
| 206355_at          | 2774        | <i>GNAL</i>         | 1.60E-03        | 1.83        | guanine nucleotide binding protein, alpha activating activity polypeptide, olfactory type   |  |
| <b>208250_s_at</b> | <b>1755</b> | <b><i>DMBT1</i></b> | <b>3.10E-03</b> | <b>1.83</b> | <b>deleted in malignant brain tumors 1</b>                                                  |  |
| 212236_x_at        | 3872        | <i>KRT17</i>        | 4.52E-02        | 1.83        | keratin 17, type I                                                                          |  |
| 1563933_a_at       | 200150      | <i>PLD5</i>         | 5.00E-04        | 1.82        | phospholipase D family, member 5                                                            |  |
| 229180_at          | 23286       | <i>WWC1</i>         | 1.30E-03        | 1.82        | WW and C2 domain containing 1                                                               |  |
| 209771_x_at        | 100133941   | <i>CD24</i>         | 2.20E-03        | 1.82        | CD24 molecule                                                                               |  |
| 237217_at          | 92949       | <i>ADAMTSL1</i>     | 8.20E-03        | 1.82        | ADAMTS like 1                                                                               |  |
| 219743_at          | 23493       | <i>HEY2</i>         | 5.53E-02        | 1.82        | hes-related family bHLH transcription factor with YRPW motif 2                              |  |
| <b>202388_at</b>   | <b>5997</b> | <b><i>RGS2</i></b>  | <b>7.25E-02</b> | <b>1.82</b> | <b>regulator of G-protein signaling 2</b>                                                   |  |
| 201811_x_at        | 9467        | <i>SH3BP5</i>       | 2.10E-03        | 1.81        | SH3-domain binding protein 5 (BTK-associated)                                               |  |
| 225999_at          | 57494       | <i>RIMKB</i>        | 2.48E-02        | 1.81        | ribosomal modification protein rimK-like family member B                                    |  |
| 218178_s_at        | 57132       | <i>CHMP1B</i>       | 3.03E-02        | 1.81        | charged multivesicular body protein 1B                                                      |  |
| 209016_s_at        | 3855        | <i>KRT7</i>         | 9.00E-04        | 1.80        | keratin 7, type II                                                                          |  |
| 1562713_a_at       | 81832       | <i>NETO1</i>        | 3.30E-03        | 1.80        | neuroligin (NRP) and tollid (TLL)-like 1                                                    |  |
| 208335_s_at        | 2532        | <i>ACKR1</i>        | 1.03E-02        | 1.80        | atypical chemokine receptor 1 (Duffy blood group)                                           |  |
| 229403_at          | 2683        | <i>BGAL1</i>        | 7.27E-02        | 1.80        | UDP-Gal:betaGlcNAc beta 1,4-galactosyltransferase, polypeptide 1                            |  |
| 243243_at          | 2719        | <i>GPC3</i>         | 1.48E-02        | 1.79        | glypican 3                                                                                  |  |
| 221577_x_at        | 9518        | <i>GDF15</i>        | 2.43E-02        | 1.79        | growth differentiation factor 15                                                            |  |
| 1554744_at         | 114769      | <i>CARD16</i>       | 2.64E-02        | 1.79        | caspase recruitment domain family, member 16                                                |  |
| 200732_s_at        | 7803        | <i>PTP4A1</i>       | 2.92E-02        | 1.79        | protein tyrosine phosphatase type IVA, member 1                                             |  |
| 213425_at          | 7474        | <i>WNT5A</i>        | 7.78E-02        | 1.79        | wingless-type MMTV integration site family, member 5A                                       |  |
| 205139_s_at        | 10090       | <i>UST</i>          | 8.29E-02        | 1.79        | uronyl-2-sulfotransferase                                                                   |  |
| 1560253_at         | 56956       | <i>LHX9</i>         | 8.92E-02        | 1.79        | LIM homeobox 9                                                                              |  |
| 229529_at          | 6943        | <i>TCF21</i>        | 9.00E-04        | 1.78        | transcription factor 21                                                                     |  |
| 226777_at          | 8038        | <i>ADAM12</i>       | 1.30E-03        | 1.78        | ADAM metalloproteinase domain 12                                                            |  |
| 225328_at          | 114907      | <i>FBXO32</i>       | 1.70E-03        | 1.78        | F-box protein 32                                                                            |  |
| 226834_at          | 79827       | <i>CLMP</i>         | 6.30E-03        | 1.78        | CXADR-like membrane protein                                                                 |  |
| 223475_at          | 83690       | <i>GISPLD1</i>      | 1.20E-03        | 1.77        | cysteine-rich secretory protein LCCL domain containing 1                                    |  |
| 205097_at          | 1836        | <i>SLC26A2</i>      | 1.50E-03        | 1.77        | solute carrier family 26 (anion exchanger), member 2                                        |  |
| 215189_at          | 3892        | <i>KRT86</i>        | 2.00E-03        | 1.77        | keratin 86, type II                                                                         |  |
| 227752_at          | 55304       | <i>SPTLC3</i>       | 3.10E-03        | 1.77        | serine palmitoyltransferase, long chain base subunit 3                                      |  |
| 228748_at          | 966         | <i>CD59</i>         | 1.56E-02        | 1.77        | CD59 molecule, complement regulatory protein                                                |  |
| 236297_at          | 84898       | <i>PLXDC2</i>       | 2.91E-02        | 1.77        | plexin domain containing 2                                                                  |  |
| 227660_at          | 84168       | <i>ANTXR1</i>       | 3.00E-04        | 1.76        | anthrax toxin receptor 1                                                                    |  |
| 209921_at          | 23657       | <i>SLC7A11</i>      | 2.07E-02        | 1.76        | solute carrier family 7 (anionic amino acid transporter light chain, xc- system), member 11 |  |
| 209387_s_at        | 4071        | <i>TM6SF1</i>       | 2.22E-02        | 1.76        | transmembrane 4 L six family member 1                                                       |  |
| 236038_at          | 57484       | <i>RNF150</i>       | 3.89E-02        | 1.76        | ring finger protein 150                                                                     |  |
| 214842_s_at        | 213         | <i>ALB</i>          | 4.74E-02        | 1.76        | albumin                                                                                     |  |
| 220092_s_at        | 84168       | <i>ANTXR1</i>       | 7.00E-04        | 1.75        | anthrax toxin receptor 1                                                                    |  |
| 229720_at          | 573         | <i>BAG1</i>         | 1.10E-03        | 1.75        | BCL2-associated athanogene                                                                  |  |
| 203710_at          | 3708        | <i>ITPR1</i>        | 6.40E-03        | 1.75        | inositol 1,4,5-trisphosphate receptor, type 1                                               |  |
| 215303_at          | 9201        | <i>DCLK1</i>        | 2.60E-03        | 1.74        | doublecortin-like kinase 1                                                                  |  |
| 219383_at          | 79899       | <i>PRR5L</i>        | 3.10E-03        | 1.74        | proline rich 5 like                                                                         |  |
| 228731_at          | 2977        | <i>GUCY1A2</i>      | 8.87E-02        | 1.74        | guanylate cyclase 1, soluble, alpha 2                                                       |  |
| 212143_s_at        | 3486        | <i>IGFBP3</i>       | 3.80E-03        | 1.73        | insulin like growth factor binding protein 3                                                |  |
| 230962_at          | 9201        | <i>DCLK1</i>        | 7.30E-03        | 1.72        | doublecortin-like kinase 1                                                                  |  |
| 225520_at          | 25902       | <i>MTHFD1L</i>      | 8.00E-03        | 1.72        | methylenetetrahydrofolate dehydrogenase (NADP+ dependent) 1-like                            |  |
| 238455_at          | 84898       | <i>PLXDC2</i>       | 1.15E-02        | 1.72        | plexin domain containing 2                                                                  |  |
| 227530_at          | 9590        | <i>AKAP12</i>       | 2.20E-02        | 1.72        | A kinase (PRKA) anchor protein 12                                                           |  |
| 236201_at          | 55304       | <i>SPTLC3</i>       | 6.71E-02        | 1.72        | serine palmitoyltransferase, long chain base subunit 3                                      |  |
| 241950_at          | 23286       | <i>WWC1</i>         | 8.80E-03        | 1.71        | WW and C2 domain containing 1                                                               |  |
| 217678_at          | 23657       | <i>SLC7A11</i>      | 1.40E-02        | 1.71        | solute carrier family 7 (anionic amino acid transporter light chain, xc- system), member 11 |  |
| 202478_at          | 28951       | <i>TRIB2</i>        | 2.78E-02        | 1.71        | tribbles pseudokinase 2                                                                     |  |
| 212906_at          | 57476       | <i>GRAMD1B</i>      | 9.87E-02        | 1.71        | GRAM domain containing 1B                                                                   |  |
| 202897_at          | 140885      | <i>SIRPA</i>        | 6.80E-03        | 1.70        | signal-regulatory protein alpha                                                             |  |
| 209277_at          | 7980        | <i>TFPI2</i>        | 2.12E-02        | 1.70        | tissue factor pathway inhibitor 2                                                           |  |
| 231559_at          | 4837        | <i>NNMT</i>         | 2.35E-02        | 1.70        | nicotinamide N-methyltransferase                                                            |  |
| 203180_at          | 220         | <i>ALDH1A3</i>      | 1.20E-03        | 1.69        | aldehyde dehydrogenase 1 family, member A3                                                  |  |
| 224959_at          | 1836        | <i>SLC26A2</i>      | 4.50E-03        | 1.69        | solute carrier family 26 (anion exchanger), member 2                                        |  |
| 219911_s_at        | 28231       | <i>SLC04A1</i>      | 1.35E-02        | 1.69        | solute carrier organic anion transporter family, member 4A1                                 |  |
| 202238_s_at        | 4837        | <i>NNMT</i>         | 1.57E-02        | 1.69        | nicotinamide N-methyltransferase                                                            |  |
| 209758_s_at        | 8076        | <i>MFAP5</i>        | 3.00E-04        | 1.68        | microfibrillar associated protein 5                                                         |  |
| 202679_at          | 4864        | <i>NPC1</i>         | 9.00E-04        | 1.68        | Niemann-Pick disease, type C1                                                               |  |

|                    |             |                    |                 |             |                                                                                             |  |
|--------------------|-------------|--------------------|-----------------|-------------|---------------------------------------------------------------------------------------------|--|
| 205399_at          | 9201        | <i>DCLK1</i>       | 2.00E-03        | 1.68        | doublecortin-like kinase 1                                                                  |  |
| 230493_at          | 387914      | <i>SHISA2</i>      | 2.70E-03        | 1.68        | shisa family member 2                                                                       |  |
| 213849_s_at        | 5521        | <i>PPP2R2B</i>     | 3.10E-03        | 1.68        | protein phosphatase 2, regulatory subunit B, beta                                           |  |
| 227867_at          | 129293      | <i>TRABD2A</i>     | 1.50E-02        | 1.68        | TraB domain containing 2A                                                                   |  |
| 215034_s_at        | 4071        | <i>TM4SF1</i>      | 2.07E-02        | 1.68        | transmembrane 4 L six family member 1                                                       |  |
| 203984_s_at        | 842         | <i>CASP9</i>       | 6.44E-02        | 1.68        | caspace 9                                                                                   |  |
| 226281_at          | 92737       | <i>DNER</i>        | 6.89E-02        | 1.68        | delta/notch like EGF repeat containing                                                      |  |
| 201925_s_at        | 1604        | <i>CD55</i>        | 7.41E-02        | 1.68        | CD55 molecule, decay accelerating factor for complement (Cromer blood group)                |  |
| 203865_s_at        | 104         | <i>ADARB1</i>      | 9.00E-04        | 1.67        | adenosine deaminase, RNA-specific, B1                                                       |  |
| 216074_x_at        | 23286       | <i>WWC1</i>        | 4.90E-03        | 1.67        | WW and C2 domain containing 1                                                               |  |
| 219825_at          | 56603       | <i>CYP26B1</i>     | 6.80E-03        | 1.67        | cytochrome P450, family 26, subfamily B, polypeptide 1                                      |  |
| 206707_x_at        | 9750        | <i>FAM65B</i>      | 1.36E-02        | 1.67        | family with sequence similarity 65, member B                                                |  |
| 228461_at          | 344558      | <i>SH3RF3</i>      | 1.20E-03        | 1.66        | SH3 domain containing ring finger 3                                                         |  |
| 209676_at          | 7035        | <i>TFPI</i>        | 2.22E-02        | 1.66        | tissue factor pathway inhibitor (lipoprotein-associated coagulation inhibitor)              |  |
| 214199_at          | 6441        | <i>SFTPD</i>       | 5.72E-02        | 1.66        | surfactant protein D                                                                        |  |
| 209829_at          | 9750        | <i>FAM65B</i>      | 7.78E-02        | 1.66        | family with sequence similarity 65, member B                                                |  |
| 206866_at          | 1002        | <i>CDH4</i>        | 1.20E-03        | 1.65        | cadherin 4, type 1, R-cadherin (retinal)                                                    |  |
| 223125_s_at        | 81563       | <i>C1orf21</i>     | 2.00E-03        | 1.65        | chromosome 1 open reading frame 21                                                          |  |
| 155486_a_at        | 79899       | <i>PRRS1</i>       | 2.90E-03        | 1.65        | proline rich 5 like                                                                         |  |
| 213258_at          | 7035        | <i>TFPI</i>        | 2.90E-03        | 1.65        | tissue factor pathway inhibitor (lipoprotein-associated coagulation inhibitor)              |  |
| 222073_at          | 1285        | <i>COL4A3</i>      | 3.90E-03        | 1.65        | collagen, type IV, alpha 3 (Goodpasture antigen)                                            |  |
| <b>204456_s_at</b> | <b>2619</b> | <b><i>GAS1</i></b> | <b>4.60E-03</b> | <b>1.65</b> | <b>growth arrest-specific 1</b>                                                             |  |
| 208108_s_at        | 554         | <i>AVPR2</i>       | 4.26E-02        | 1.65        | arginine vasopressin receptor 2                                                             |  |
| 215646_s_at        | 1462        | <i>VCAN</i>        | 7.22E-02        | 1.65        | versican                                                                                    |  |
| 213085_s_at        | 23286       | <i>WWC1</i>        | 8.00E-04        | 1.64        | WW and C2 domain containing 1                                                               |  |
| 213988_s_at        | 6303        | <i>SAT1</i>        | 2.49E-02        | 1.64        | spermidine/spermine N1-acetyltransferase 1                                                  |  |
| 217546_at          | 4499        | <i>MT1M</i>        | 3.96E-02        | 1.64        | metallothionein 1M                                                                          |  |
| 219737_s_at        | 5101        | <i>PCDH9</i>       | 7.13E-02        | 1.64        | protocadherin 9                                                                             |  |
| 224783_at          | 283991      | <i>UBALD2</i>      | 9.00E-04        | 1.63        | UBA-like domain containing 2                                                                |  |
| 225540_at          | 4133        | <i>MAP2</i>        | 1.20E-03        | 1.63        | microtubule associated protein 2                                                            |  |
| 202723_s_at        | 2308        | <i>FOXO1</i>       | 4.30E-03        | 1.63        | forkhead box O1                                                                             |  |
| 232206_at          | 54986       | <i>ULK4</i>        | 3.00E-04        | 1.62        | unc-51 like kinase 4                                                                        |  |
| 219714_s_at        | 55799       | <i>CACNA2D3</i>    | 5.00E-04        | 1.62        | calcium channel, voltage-dependent, alpha 2/delta subunit 3                                 |  |
| 229585_at          | 92949       | <i>ADAMTSL1</i>    | 3.40E-03        | 1.62        | ADAMTS like 1                                                                               |  |
| 216598_s_at        | 6347        | <i>CCL2</i>        | 6.70E-03        | 1.62        | chemokine (C-C motif) ligand 2                                                              |  |
| 205795_s_at        | 9369        | <i>NRXN3</i>       | 9.80E-03        | 1.62        | neurexin 3                                                                                  |  |
| 209355_s_at        | 8613        | <i>PLPP3</i>       | 1.17E-02        | 1.62        | phospholipid phosphatase 3                                                                  |  |
| 216944_s_at        | 3708        | <i>ITPR1</i>       | 3.78E-02        | 1.62        | inositol 1,4,5-trisphosphate receptor, type 1                                               |  |
| 238419_at          | 90102       | <i>PHLDB2</i>      | 4.08E-02        | 1.62        | pleckstrin homology-like domain, family B, member 2                                         |  |
| 206002_at          | 10149       | <i>ADGRG2</i>      | 7.00E-04        | 1.61        | adhesion G protein-coupled receptor G2                                                      |  |
| 226506_at          | 79875       | <i>THSD4</i>       | 1.80E-03        | 1.61        | thrombospondin type 1 domain containing 4                                                   |  |
| 36711_at           | 23764       | <i>MAFF</i>        | 2.14E-02        | 1.61        | v-maf avian musculoaponeurotic fibrosarcoma oncogene homolog F                              |  |
| 231067_s_at        | 9590        | <i>AKAP12</i>      | 2.39E-02        | 1.61        | A kinase (PKA) anchor protein 12                                                            |  |
| 210775_x_at        | 842         | <i>CASP9</i>       | 4.69E-02        | 1.61        | caspace 9                                                                                   |  |
| 229228_at          | 9586        | <i>CREB5</i>       | 6.56E-02        | 1.61        | cAMP responsive element binding protein 5                                                   |  |
| 225803_at          | 114907      | <i>FBXO32</i>      | 4.60E-03        | 1.60        | F-box protein 32                                                                            |  |
| 207826_s_at        | 3399        | <i>ID3</i>         | 9.50E-03        | 1.60        | inhibitor of DNA binding 3, dominant negative helix-loop-helix protein                      |  |
| 209278_s_at        | 7980        | <i>TFPI2</i>       | 1.71E-02        | 1.60        | tissue factor pathway inhibitor 2                                                           |  |
| 201508_at          | 3487        | <i>IGFBP4</i>      | 9.00E-04        | 1.59        | insulin like growth factor binding protein 4                                                |  |
| 209276_s_at        | 2745        | <i>GLRX</i>        | 1.80E-03        | 1.59        | glutaredoxin                                                                                |  |
| 225989_at          | 26091       | <i>HERC4</i>       | 3.10E-03        | 1.59        | HECT and RLD domain containing E3 ubiquitin protein ligase 4                                |  |
| 229649_at          | 9369        | <i>NRXN3</i>       | 3.90E-03        | 1.59        | neurexin 3                                                                                  |  |
| 210592_s_at        | 6303        | <i>SAT1</i>        | 1.97E-02        | 1.59        | spermidine/spermine N1-acetyltransferase 1                                                  |  |
| 238877_at          | 2070        | <i>EYA4</i>        | 2.67E-02        | 1.59        | EYA transcriptional coactivator and phosphatase 4                                           |  |
| 213624_at          | 10924       | <i>SMPDL3A</i>     | 3.36E-02        | 1.59        | sphingomyelin phosphodiesterase, acid-like 3A                                               |  |
| 211682_x_at        | 54490       | <i>UGT2B28</i>     | 4.95E-02        | 1.59        | UDP glucuronosyltransferase 2 family, polypeptide B28                                       |  |
| 204039_at          | 1050        | <i>CEBPA</i>       | 5.67E-02        | 1.59        | CCAAT/enhancer binding protein (C/EBP), alpha                                               |  |
| 204288_s_at        | 8470        | <i>SORBS2</i>      | 5.74E-02        | 1.59        | sorbin and SH3 domain containing 2                                                          |  |
| 226931_at          | 83857       | <i>TMTC1</i>       | 7.00E-04        | 1.58        | transmembrane and tetratricopeptide repeat containing 1                                     |  |
| 209386_at          | 4071        | <i>TM4SF1</i>      | 1.38E-02        | 1.58        | transmembrane 4 L six family member 1                                                       |  |
| 224480_s_at        | 84803       | <i>GPAT3</i>       | 2.18E-02        | 1.58        | glycerol-3-phosphate acyltransferase 3                                                      |  |
| 202479_s_at        | 28951       | <i>TRIB2</i>       | 8.42E-02        | 1.58        | tribbles pseudokinase 2                                                                     |  |
| 205074_at          | 6584        | <i>SLC22A5</i>     | 2.60E-03        | 1.57        | solute carrier family 22 (organic cation/carnitine transporter), member 5                   |  |
| 238733_at          | 4193        | <i>MDM2</i>        | 5.00E-03        | 1.57        | MDM2 proto-oncogene, E3 ubiquitin protein ligase                                            |  |
| 212226_s_at        | 8613        | <i>PLPP3</i>       | 8.80E-03        | 1.57        | phospholipid phosphatase 3                                                                  |  |
| 221731_x_at        | 1462        | <i>VCAN</i>        | 1.31E-02        | 1.57        | versican                                                                                    |  |
| 33304_at           | 3669        | <i>ISG20</i>       | 1.46E-02        | 1.57        | interferon stimulated exonuclease gene 20kDa                                                |  |
| 232124_at          | 729085      | <i>FAM198A</i>     | 2.16E-02        | 1.57        | family with sequence similarity 198, member A                                               |  |
| 228293_at          | 91614       | <i>DEPDC7</i>      | 4.93E-02        | 1.57        | DEP domain containing 7                                                                     |  |
| 228933_at          | 4810        | <i>NHS</i>         | 6.40E-02        | 1.57        | Nance-Horan syndrome (congenital cataracts and dental anomalies)                            |  |
| 203108_at          | 9052        | <i>GPRCSA</i>      | 5.00E-04        | 1.56        | G protein-coupled receptor, class C, group 5, member A                                      |  |
| 230193_at          | 144406      | <i>WDR66</i>       | 3.20E-03        | 1.56        | WD repeat domain 66                                                                         |  |
| 207528_s_at        | 23657       | <i>SLC7A11</i>     | 6.60E-03        | 1.56        | solute carrier family 7 (anionic amino acid transporter light chain, xc- system), member 11 |  |
| 204698_at          | 3669        | <i>ISG20</i>       | 1.29E-02        | 1.56        | interferon stimulated exonuclease gene 20kDa                                                |  |
| 205870_at          | 624         | <i>BDKRB2</i>      | 4.44E-02        | 1.56        | bradykinin receptor B2                                                                      |  |
| 223402_at          | 54935       | <i>DUSP23</i>      | 1.50E-03        | 1.55        | dual specificity phosphatase 23                                                             |  |
| 202387_at          | 573         | <i>BAG1</i>        | 1.60E-03        | 1.55        | BCL2-associated athanogene                                                                  |  |
| 209087_x_at        | 4162        | <i>MCAM</i>        | 4.60E-03        | 1.55        | melanoma cell adhesion molecule                                                             |  |
| 242624_at          | 84448       | <i>ABLIM2</i>      | 8.00E-03        | 1.55        | actin binding LIM protein family, member 2                                                  |  |
| 217623_at          | 91807       | <i>MYLK3</i>       | 1.30E-02        | 1.55        | myosin light chain kinase 3                                                                 |  |
| 202724_s_at        | 2308        | <i>FOXO1</i>       | 1.57E-02        | 1.55        | forkhead box O1                                                                             |  |
| 200730_s_at        | 7803        | <i>PTP4A1</i>      | 5.37E-02        | 1.55        | protein tyrosine phosphatase type IVA, member 1                                             |  |
| 210869_s_at        | 4162        | <i>MCAM</i>        | 2.10E-03        | 1.54        | melanoma cell adhesion molecule                                                             |  |
| 210095_s_at        | 3486        | <i>IGFBP3</i>      | 2.90E-03        | 1.54        | insulin like growth factor binding protein 3                                                |  |
| 226431_at          | 150864      | <i>FAM117B</i>     | 3.70E-03        | 1.54        | family with sequence similarity 117, member B                                               |  |
| 228625_at          | 163732      | <i>CITED4</i>      | 1.01E-02        | 1.54        | Cbp/p300-interacting transactivator, with Glu/Asp rich carboxy-terminal domain, 4           |  |
| 202237_at          | 4837        | <i>NNMT</i>        | 1.36E-02        | 1.54        | nicotinamide N-methyltransferase                                                            |  |
| 228813_at          | 9759        | <i>HDAC4</i>       | 1.57E-02        | 1.54        | histone deacetylase 4                                                                       |  |
| 213790_at          | 8038        | <i>ADAM12</i>      | 2.61E-02        | 1.54        | ADAM metallopeptidase domain 12                                                             |  |
| 243358_at          | 3480        | <i>IGF1R</i>       | 2.64E-02        | 1.54        | insulin-like growth factor 1 receptor                                                       |  |
| 213508_at          | 171546      | <i>SPTSSA</i>      | 4.14E-02        | 1.54        | serine palmitoyltransferase, small subunit A                                                |  |
| 225496_s_at        | 54843       | <i>SYTL2</i>       | 5.37E-02        | 1.54        | synaptotagmin-like 2                                                                        |  |
| 211475_s_at        | 573         | <i>BAG1</i>        | 1.40E-03        | 1.53        | BCL2-associated athanogene                                                                  |  |
| 202254_at          | 26037       | <i>SIPA1L1</i>     | 5.70E-03        | 1.53        | signal-induced proliferation-associated 1 like 1                                            |  |

|              |        |                 |          |      |                                                                                |  |
|--------------|--------|-----------------|----------|------|--------------------------------------------------------------------------------|--|
| 201858_s_at  | 5552   | <i>SRGN</i>     | 6.80E-03 | 1.53 | serglycin                                                                      |  |
| 1555950_a_at | 1604   | <i>CD55</i>     | 1.74E-02 | 1.53 | CD55 molecule, decay accelerating factor for complement (Cromer blood group)   |  |
| 227657_at    | 57484  | <i>RNF150</i>   | 3.90E-02 | 1.53 | ring finger protein 150                                                        |  |
| 229812_s_at  | 84196  | <i>USP48</i>    | 4.12E-02 | 1.53 | ubiquitin specific peptidase 48                                                |  |
| 231015_at    | 28999  | <i>KLIF15</i>   | 7.74E-02 | 1.53 | Kruppel-like factor 15                                                         |  |
| 218113_at    | 23670  | <i>TMEM2</i>    | 9.95E-02 | 1.53 | transmembrane protein 2                                                        |  |
| 226322_at    | 83857  | <i>TMTC1</i>    | 1.70E-03 | 1.52 | transmembrane and tetratricopeptide repeat containing 1                        |  |
| 219501_at    | 55068  | <i>ENOX1</i>    | 2.20E-03 | 1.52 | ecto-NOX disulfide-thiol exchanger 1                                           |  |
| 210015_s_at  | 4133   | <i>MAP2</i>     | 2.60E-03 | 1.52 | microtubule associated protein 2                                               |  |
| 208055_s_at  | 26091  | <i>HERC4</i>    | 2.69E-02 | 1.52 | HECT and RLD domain containing E3 ubiquitin protein ligase 4                   |  |
| 226811_at    | 54855  | <i>FAM46C</i>   | 8.29E-02 | 1.52 | family with sequence similarity 46, member C                                   |  |
| 203455_s_at  | 6303   | <i>SAT1</i>     | 9.47E-02 | 1.52 | spermidine/spermine N1-acetyltransferase 1                                     |  |
| 220227_at    | 1002   | <i>CDH4</i>     | 1.30E-03 | 1.51 | cadherin 4, type 1, R-cadherin (retinal)                                       |  |
| 229310_at    | 114818 | <i>KLHL29</i>   | 1.00E-02 | 1.51 | kelch-like family member 29                                                    |  |
| 210664_s_at  | 7035   | <i>TFPI</i>     | 2.43E-02 | 1.51 | tissue factor pathway inhibitor (lipoprotein-associated coagulation inhibitor) |  |
| 209683_at    | 81553  | <i>FAM49A</i>   | 4.80E-02 | 1.51 | family with sequence similarity 49, member A                                   |  |
| 228796_at    | 131034 | <i>CPNE4</i>    | 5.13E-02 | 1.51 | copine IV                                                                      |  |
| 205193_at    | 23764  | <i>MAFF</i>     | 8.39E-02 | 1.51 | v-maf avian musculoaponeurotic fibrosarcoma oncogene homolog F                 |  |
| 205462_s_at  | 3241   | <i>HPCAL1</i>   | 1.30E-03 | 1.50 | hippocalcin-like 1                                                             |  |
| 239352_at    | 55117  | <i>SLC6A15</i>  | 4.30E-03 | 1.50 | solute carrier family 6 (neutral amino acid transporter), member 15            |  |
| 213280_at    | 23108  | <i>RAP1GAP2</i> | 2.18E-02 | 1.50 | RAP1 GTPase activating protein 2                                               |  |
| 220148_at    | 64577  | <i>ALDH8A1</i>  | 4.05E-02 | 1.50 | aldehyde dehydrogenase 8 family, member A1                                     |  |
| 233506_at    | 9689   | <i>BZW1</i>     | 9.02E-02 | 1.50 | basic leucine zipper and W2 domains 1                                          |  |

#### Indacaterol (18h)

(9 Probe Sets  $\equiv$  9 Gene IDs)

| Affy Probe Set ID | Entrez Gene ID | Official Gene Symbol | FDR P-Value | Fold change | UniGene Name                                      | Function |
|-------------------|----------------|----------------------|-------------|-------------|---------------------------------------------------|----------|
| 237328_at         | 55195          | <i>C14orf105</i>     | 9.76E-02    | 3.27        | chromosome 14 open reading frame 105              |          |
| 1556420_s_at      | 388403         | <i>YPEL2</i>         | 4.21E-02    | 2.24        | yippee like 2                                     |          |
| 216639_at         | 27286          | <i>SRPX2</i>         | 7.81E-02    | 2.02        | sushi-repeat containing protein, X-linked 2       |          |
| 220006_at         | 79825          | <i>EFCC1</i>         | 4.21E-02    | 1.98        | EF-hand and coiled-coil domain containing 1       |          |
| 237222_at         | 123722         | <i>FSD2</i>          | 9.76E-02    | 1.85        | fibronectin type III and SPRY domain containing 2 |          |
| 208335_s_at       | 2532           | <i>ACKR1</i>         | 3.93E-02    | 1.59        | atypical chemokine receptor 1 (Duffy blood group) |          |
| 220227_at         | 1002           | <i>CDH4</i>          | 3.67E-02    | 1.55        | cadherin 4, type 1, R-cadherin (retinal)          |          |
| 1554202_x_at      | 57010          | <i>CABP4</i>         | 9.76E-02    | 1.54        | calcium binding protein 4                         |          |
| 220335_x_at       | 23491          | <i>CES3</i>          | 3.53E-02    | 1.53        | carboxylesterase 3                                |          |

Transcripts used for real-time PCR validation are bolded and underlined.

\*Some genes are recognised by more than one probe set and some probe sets recognise more than one gene.

**Supplemental TABLE 4.** Indacaterol-repressed transcripts with expression level changes <0.67-fold (*FDR* < 0.10) at 1h, 2h, 6h and 18h.

|                                      |                |                      |                 |             |                                                         | Transcriptional Regulators | Transporters, Ion Channels and Membrane Receptors | Metabolic Proteins | General Signalling Molecules, including Translational Regulators | Other Functions | Not Assigned |
|--------------------------------------|----------------|----------------------|-----------------|-------------|---------------------------------------------------------|----------------------------|---------------------------------------------------|--------------------|------------------------------------------------------------------|-----------------|--------------|
| <b>Indacaterol (1h)</b>              |                |                      |                 |             |                                                         |                            |                                                   |                    |                                                                  |                 |              |
| <b>(39 Probe Sets ≡ 46 Gene IDs)</b> |                |                      |                 |             |                                                         |                            |                                                   |                    |                                                                  |                 |              |
| Affy Probe Set ID*                   | Entrez Gene ID | Official Gene Symbol | FDR P-Value     | Fold change | UniGene Name                                            | Function                   |                                                   |                    |                                                                  |                 |              |
| 210919_at                            | 23239          | PHLPP1               | 7.23E-02        | 0.15        | PH domain and leucine rich repeat protein phosphatase 1 |                            |                                                   |                    |                                                                  |                 |              |
| 1569262_x_at                         | 90025          | UBE3D                | 5.12E-02        | 0.19        | ubiquitin protein ligase E3D                            |                            |                                                   |                    |                                                                  |                 |              |
| 236811_at                            | 63946          | DMRTC2               | 9.40E-02        | 0.41        | DMRT-like family C2                                     |                            |                                                   |                    |                                                                  |                 |              |
| 236862_at                            | 57120          | GOPC                 | 7.67E-02        | 0.44        | golgi-associated PDZ and coiled-coil motif containing   |                            |                                                   |                    |                                                                  |                 |              |
| 237943_at                            | 23023          | TMCC1                | 1.26E-02        | 0.49        | transmembrane and coiled-coil domain family 1           |                            |                                                   |                    |                                                                  |                 |              |
| 237469_at                            | 7153           | TOP2A                | 7.00E-03        | 0.50        | topoisomerase (DNA) II alpha                            |                            |                                                   |                    |                                                                  |                 |              |
| 218657_at                            | 51195          | RAPGEFL1             | 8.58E-02        | 0.51        | Rap guanine nucleotide exchange factor like 1           |                            |                                                   |                    |                                                                  |                 |              |
| 1557852_at                           | 1912           | PHC2                 | 7.80E-03        | 0.51        | polyhomeotic homolog 2 (Drosophila)                     |                            |                                                   |                    |                                                                  |                 |              |
| 1558124_at                           | 134492         | NUDCD2               | 5.91E-02        | 0.53        | NudC domain containing 2                                |                            |                                                   |                    |                                                                  |                 |              |
| 244427_at                            | 9493           | KIF23                | 6.70E-03        | 0.55        | kinesin family member 23                                |                            |                                                   |                    |                                                                  |                 |              |
| 1561720_at                           | 9400           | RECQL5               | 5.67E-02        | 0.55        | RecQ helicase-like 5                                    |                            |                                                   |                    |                                                                  |                 |              |
| <b>201693_s_at</b>                   | <b>1958</b>    | <b>EGR1</b>          | <b>7.00E-03</b> | <b>0.56</b> | <b>early growth response 1</b>                          |                            |                                                   |                    |                                                                  |                 |              |
| 236841_at                            | 100287171      | WASHC1               | 3.27E-02        | 0.57        | WAS protein family homolog 1                            |                            |                                                   |                    |                                                                  |                 |              |
| 220084_at                            | 55195          | CCDC198              | 5.65E-02        | 0.58        | coiled-Coil Domain Containing 198                       |                            |                                                   |                    |                                                                  |                 |              |
| 239194_at                            | 84277          | DNAJC30              | 9.91E-02        | 0.58        | Dnaj (Hsp40) homolog, subfamily C, member 30            |                            |                                                   |                    |                                                                  |                 |              |
| 214918_at                            | 4670           | HNRNPM               | 8.11E-02        | 0.60        | heterogeneous nuclear ribonucleoprotein M               |                            |                                                   |                    |                                                                  |                 |              |
| <b>201009_s_at</b>                   | <b>10628</b>   | <b>TXNIP</b>         | <b>1.02E-02</b> | <b>0.60</b> | <b>thioredoxin interacting protein</b>                  |                            |                                                   |                    |                                                                  |                 |              |
| 240452_at                            | 2935           | GSP1T                | 5.04E-02        | 0.60        | G1 to S phase transition 1                              |                            |                                                   |                    |                                                                  |                 |              |
| 230998_at                            | 11335          | CBX3                 | 9.92E-02        | 0.61        | chromobox homolog 3                                     |                            |                                                   |                    |                                                                  |                 |              |
| 231292_at                            | 493861         | EID3                 | 9.51E-02        | 0.61        | EP300 interacting inhibitor of differentiation 3        |                            |                                                   |                    |                                                                  |                 |              |
| 228455_at                            | 64783          | RBM15                | 3.95E-02        | 0.61        | RNA binding motif protein 15                            |                            |                                                   |                    |                                                                  |                 |              |
| 228393_s_at                          | 55900          | ZNF302               | 4.43E-02        | 0.61        | zinc finger protein 302                                 |                            |                                                   |                    |                                                                  |                 |              |
| 242922_at                            | 408050         | NOMO3                | 7.19E-02        | 0.63        | NODAL modulator 3                                       |                            |                                                   |                    |                                                                  |                 |              |
|                                      | 55672          | NBPF1                |                 |             | neuroblastoma breakpoint family member 1                |                            |                                                   |                    |                                                                  |                 |              |
|                                      | 728841         | NBPF8                |                 |             | neuroblastoma breakpoint family, member 8               |                            |                                                   |                    |                                                                  |                 |              |
|                                      | 400818         | NBPF9                |                 |             | neuroblastoma breakpoint family, member 9               |                            |                                                   |                    |                                                                  |                 |              |
|                                      | 100132406      | NBPF10               |                 |             | neuroblastoma breakpoint family, member 10              |                            |                                                   |                    |                                                                  |                 |              |
|                                      | 200030         | NBPF11               |                 |             | neuroblastoma breakpoint family, member 11              |                            |                                                   |                    |                                                                  |                 |              |
| 1569519_at                           | 149013         | NBPF12               | 8.16E-02        | 0.63        | neuroblastoma breakpoint family, member 12              |                            |                                                   |                    |                                                                  |                 |              |
|                                      | 25832          | NBPF14               |                 |             | neuroblastoma breakpoint family, member 14              |                            |                                                   |                    |                                                                  |                 |              |
|                                      | 101060226      | NBPF19               |                 |             | neuroblastoma breakpoint family, member 19              |                            |                                                   |                    |                                                                  |                 |              |
|                                      | 101060684      | NBPF26               |                 |             | neuroblastoma breakpoint family, member 26              |                            |                                                   |                    |                                                                  |                 |              |
|                                      | 100996763      | LOC100996763         |                 |             | notch Homolog 2 N-Terminal-Like Protein                 |                            |                                                   |                    |                                                                  |                 |              |
|                                      | 102724250      | LOC102724250         |                 |             | neuroblastoma breakpoint family member 1                |                            |                                                   |                    |                                                                  |                 |              |
| 1570173_at                           | 25896          | INTS7                | 3.50E-02        | 0.63        | integrator complex subunit 7                            |                            |                                                   |                    |                                                                  |                 |              |
| 242111_at                            | 56339          | MEFTL3               | 3.50E-03        | 0.63        | methyltransferase like 3                                |                            |                                                   |                    |                                                                  |                 |              |
| 1561965_at                           | 6629           | SNRPB2               | 2.30E-02        | 0.63        | small nuclear ribonucleoprotein polypeptide B           |                            |                                                   |                    |                                                                  |                 |              |
| 229423_at                            | 1111           | CHEK1                | 9.47E-02        | 0.64        | checkpoint kinase 1                                     |                            |                                                   |                    |                                                                  |                 |              |
| <b>201008_s_at</b>                   | <b>10628</b>   | <b>TXNIP</b>         | <b>2.90E-03</b> | <b>0.64</b> | <b>thioredoxin interacting protein</b>                  |                            |                                                   |                    |                                                                  |                 |              |
| 1559993_at                           | 81855          | SFXN3                | 8.94E-02        | 0.65        | sideroflexin 3                                          |                            |                                                   |                    |                                                                  |                 |              |
| 1565703_at                           | 4089           | SMAD4                | 6.24E-02        | 0.65        | SMAD family member 4                                    |                            |                                                   |                    |                                                                  |                 |              |
| 201466_s_at                          | 3725           | JUN                  | 3.80E-02        | 0.65        | jun proto-oncogene                                      |                            |                                                   |                    |                                                                  |                 |              |
| 232055_at                            | 94081          | SFXN1                | 8.11E-02        | 0.65        | sideroflexin 1                                          |                            |                                                   |                    |                                                                  |                 |              |
| 239044_at                            | 81533          | ITFG1                | 2.20E-03        | 0.65        | integrin alpha FG-GAP repeat containing 1               |                            |                                                   |                    |                                                                  |                 |              |
| <b>201694_s_at</b>                   | <b>1958</b>    | <b>EGR1</b>          | <b>1.17E-02</b> | <b>0.66</b> | <b>early growth response 1</b>                          |                            |                                                   |                    |                                                                  |                 |              |
| 239071_at                            | 5928           | RBBP4                | 7.29E-02        | 0.66        | retinoblastoma binding protein 4                        |                            |                                                   |                    |                                                                  |                 |              |
| 219545_at                            | 65987          | KCTD14               | 8.43E-02        | 0.66        | potassium channel tetramerization domain containing 14  |                            |                                                   |                    |                                                                  |                 |              |
|                                      | 100532726      | NDUFC2-KCTD14        |                 |             | NDUFC2-KCTD14 readthrough                               |                            |                                                   |                    |                                                                  |                 |              |
| 206683_at                            | 7718           | ZNF165               | 9.17E-02        | 0.66        | zinc finger protein 165                                 |                            |                                                   |                    |                                                                  |                 |              |
| 1553349_at                           | 196528         | ARID2                | 9.47E-02        | 0.67        | AT rich interactive domain 2 (ARID, RFX-like)           |                            |                                                   |                    |                                                                  |                 |              |

| <b>Indacaterol (2h)</b>              |                |                      |                 |             |                                                                      |          |  |  |  |  |  |
|--------------------------------------|----------------|----------------------|-----------------|-------------|----------------------------------------------------------------------|----------|--|--|--|--|--|
| <b>(51 Probe Sets ≡ 47 Gene IDs)</b> |                |                      |                 |             |                                                                      |          |  |  |  |  |  |
| Affy Probe Set ID*                   | Entrez Gene ID | Official Gene Symbol | FDR P-Value     | Fold change | UniGene Name                                                         | Function |  |  |  |  |  |
| 232328_at                            | 79818          | ZNF552               | 1.70E-03        | 0.22        | zinc finger protein 552                                              |          |  |  |  |  |  |
| 216345_at                            | 23053          | ZSWIM8               | 5.53E-02        | 0.34        | zinc finger, SWIM-type containing 8                                  |          |  |  |  |  |  |
| 1569262_x_at                         | 90025          | UBE3D                | 6.85E-02        | 0.36        | ubiquitin protein ligase E3D                                         |          |  |  |  |  |  |
| <b>227404_s_at</b>                   | <b>1958</b>    | <b>EGR1</b>          | <b>7.00E-04</b> | <b>0.38</b> | <b>early growth response 1</b>                                       |          |  |  |  |  |  |
| <b>201009_s_at</b>                   | <b>10628</b>   | <b>TXNIP</b>         | <b>7.00E-04</b> | <b>0.40</b> | <b>thioredoxin interacting protein</b>                               |          |  |  |  |  |  |
| 230673_at                            | 93035          | PKHD1L1              | 9.18E-02        | 0.40        | polycystic kidney and hepatic disease 1 (autosomal recessive)-like 1 |          |  |  |  |  |  |
| <b>201694_s_at</b>                   | <b>1958</b>    | <b>EGR1</b>          | <b>3.00E-04</b> | <b>0.40</b> | <b>early growth response 1</b>                                       |          |  |  |  |  |  |
| <b>201008_s_at</b>                   | <b>10628</b>   | <b>TXNIP</b>         | <b>3.00E-04</b> | <b>0.42</b> | <b>thioredoxin interacting protein</b>                               |          |  |  |  |  |  |
| 1556300_s_at                         | 6492           | SIM1                 | 2.20E-03        | 0.42        | single-minded family bHLH transcription factor 1                     |          |  |  |  |  |  |
| <b>201010_s_at</b>                   | <b>10628</b>   | <b>TXNIP</b>         | <b>3.00E-04</b> | <b>0.45</b> | <b>thioredoxin interacting protein</b>                               |          |  |  |  |  |  |
| 206876_at                            | 6492           | SIM1                 | 5.20E-03        | 0.45        | single-minded family bHLH transcription factor 1                     |          |  |  |  |  |  |
| 237469_at                            | 7153           | TOP2A                | 2.00E-04        | 0.46        | topoisomerase (DNA) II alpha                                         |          |  |  |  |  |  |
| 244427_at                            | 9493           | KIF23                | 1.50E-03        | 0.48        | kinesin family member 23                                             |          |  |  |  |  |  |
| 1555591_at                           | 80119          | PIF1                 | 6.70E-02        | 0.49        | PIF1 5'-to-3' DNA helicase                                           |          |  |  |  |  |  |
| 216109_at                            | 23389          | MED13L               | 1.30E-02        | 0.51        | mediator complex subunit 13-like                                     |          |  |  |  |  |  |
| 1566111_at                           | 9780           | PIEZO1               | 1.20E-03        | 0.51        | piezo-type mechanosensitive ion channel component 1                  |          |  |  |  |  |  |
| 206115_at                            | 1960           | EGR3                 | 5.78E-02        | 0.52        | early growth response 3                                              |          |  |  |  |  |  |
| 1552880_at                           | 89866          | SEC16B               | 2.49E-02        | 0.53        | SEC16 homolog B, endoplasmic reticulum export factor                 |          |  |  |  |  |  |
| 215175_at                            | 22990          | PCNX                 | 1.12E-02        | 0.53        | pecanex homolog (Drosophila)                                         |          |  |  |  |  |  |
| 215508_at                            | 699            | BUB1                 | 7.38E-02        | 0.54        | BUB1 mitotic checkpoint serine/threonine kinase                      |          |  |  |  |  |  |
| 204826_at                            | 899            | CCNF                 | 3.40E-03        | 0.54        | cyclin F                                                             |          |  |  |  |  |  |
| 240432_x_at                          | 8609           | KLF7                 | 1.02E-02        | 0.54        | Kruppel-like factor 7 (ubiquitous)                                   |          |  |  |  |  |  |
| 1553883_at                           | 7652           | ZNF99                | 4.47E-02        | 0.55        | zinc finger protein 99                                               |          |  |  |  |  |  |
| <b>201693_s_at</b>                   | <b>1958</b>    | <b>EGR1</b>          | <b>1.95E-02</b> | <b>0.55</b> | <b>early growth response 1</b>                                       |          |  |  |  |  |  |
| 238049_at                            | 65983          | GRAMD3               | 4.99E-02        | 0.55        | GRAM domain containing 3                                             |          |  |  |  |  |  |
| 232735_at                            | 284615         | ANKRD34A             | 4.00E-03        | 0.56        | ankyrin repeat domain 34A                                            |          |  |  |  |  |  |

|              |           |                     |          |      |                                                            |  |
|--------------|-----------|---------------------|----------|------|------------------------------------------------------------|--|
| 208025_s_at  | 8091      | <i>HMG2</i>         | 1.30E-03 | 0.56 | high mobility group AT-hook 2                              |  |
| 232912_at    | 160897    | <i>GPR180</i>       | 8.34E-02 | 0.57 | G protein-coupled receptor 180                             |  |
| 220709_at    | 80032     | <i>ZNF556</i>       | 7.18E-02 | 0.57 | zinc finger protein 556                                    |  |
|              | 23049     | <i>NPIP84</i>       |          |      | nuclear pore complex interacting protein family, member B4 |  |
|              | 440345    | <i>NPIP85</i>       |          |      | nuclear pore complex interacting protein family, member B5 |  |
|              | 440354    | <i>SMG1</i>         |          |      | SMG1 phosphatidylinositol 3-kinase-related kinase          |  |
|              | 595101    | <i>SMG1P1</i>       |          |      | SMG1 pseudogene 1                                          |  |
|              | 641298    | <i>SMG1P2</i>       |          |      | SMG1 pseudogene 2                                          |  |
| 244766_at    | 100132247 | <i>SMG1P3</i>       | 6.15E-02 | 0.57 | SMG1 pseudogene 3                                          |  |
|              | 100271836 | <i>SMG1P5</i>       |          |      | SMG1 pseudogene 5                                          |  |
|              | 100506060 | <i>SMG1P7</i>       |          |      | SMG1 pseudogene 7                                          |  |
|              | 101060596 | <i>LOC101060596</i> |          |      | serine/threonine-protein kinase SMG1-Like                  |  |
|              | 105369244 | <i>LOC105369244</i> |          |      | serine/threonine-protein kinase SMG1-Like                  |  |
|              | 105369278 | <i>LOC105369278</i> |          |      | serine/threonine-protein kinase SMG1-Like                  |  |
| 219544_at    | 79866     | <i>BORA</i>         | 2.80E-03 | 0.59 | bora, aurora kinase A activator                            |  |
| 228892_at    | 153769    | <i>SH3RF2</i>       | 9.78E-02 | 0.60 | SH3 domain containing ring finger 2                        |  |
| 207286_at    | 9662      | <i>CEP135</i>       | 2.57E-02 | 0.61 | centrosomal protein 135kDa                                 |  |
| 227687_at    | 219844    | <i>HYLS1</i>        | 2.40E-03 | 0.61 | hydrolethalus syndrome 1                                   |  |
| 201896_s_at  | 84722     | <i>PSRC1</i>        | 9.00E-04 | 0.61 | proline/serine-rich coiled-coil 1                          |  |
| 230462_at    | 8650      | <i>NUMB</i>         | 3.38E-02 | 0.62 | numb homolog (Drosophila)                                  |  |
| 218192_at    | 51447     | <i>IP6K2</i>        | 5.40E-03 | 0.63 | inositol hexakisphosphate kinase 2                         |  |
| 238220_at    | 7403      | <i>KDM6A</i>        | 7.53E-02 | 0.63 | lysine (K)-specific demethylase 6A                         |  |
| 1552546_a_at | 137994    | <i>LETM2</i>        | 2.06E-02 | 0.63 | leucine zipper-EF-hand containing transmembrane protein 2  |  |
| 235690_at    | 84622     | <i>ZNF594</i>       | 7.49E-02 | 0.63 | zinc finger protein 594                                    |  |
| 216061_x_at  | 5155      | <i>PDGFB</i>        | 1.13E-02 | 0.63 | platelet-derived growth factor beta polypeptide            |  |
| 227801_at    | 286827    | <i>TRIM59</i>       | 7.00E-03 | 0.64 | tripartite motif containing 59                             |  |
| 218726_at    | 55355     | <i>HIURP</i>        | 9.20E-03 | 0.65 | Holliday junction recognition protein                      |  |
| 216081_at    | 3910      | <i>LAMA4</i>        | 6.14E-02 | 0.65 | laminin, alpha 4                                           |  |
| 204349_at    | 9443      | <i>MED7</i>         | 3.98E-02 | 0.65 | mediator complex subunit 7                                 |  |
| 235165_at    | 84612     | <i>PARD6B</i>       | 7.48E-02 | 0.65 | par-6 family cell polarity regulator beta                  |  |
| 233782_at    | 10238     | <i>DCAF7</i>        | 1.69E-02 | 0.65 | DDB1 and CUL4 associated factor 7                          |  |
| 235476_at    | 286827    | <i>TRIM59</i>       | 8.20E-03 | 0.65 | tripartite motif containing 59                             |  |
| 214918_at    | 4670      | <i>HNRNPM</i>       | 6.42E-02 | 0.66 | heterogeneous nuclear ribonucleoprotein M                  |  |
| 225283_at    | 91947     | <i>ARRDC4</i>       | 4.50E-03 | 0.66 | arrestin domain containing 4                               |  |
| 1552794_a_at | 284306    | <i>ZNF547</i>       | 6.66E-02 | 0.66 | zinc finger protein 547                                    |  |

#### Indacaterol (6h)

(51 Probe Sets = 47 Gene IDs)

| Affy Probe Set ID* | Entrez Gene ID | Official Gene Symbol | FDR P-Value     | Fold change | UniGene Name                                                                                              | Function |
|--------------------|----------------|----------------------|-----------------|-------------|-----------------------------------------------------------------------------------------------------------|----------|
| 231600_at          | 387837         | <i>CLEC12B</i>       | 3.31E-02        | 0.26        | C-type lectin domain family 12, member B                                                                  |          |
| 204823_at          | 89795          | <i>NAV3</i>          | 8.00E-04        | 0.35        | neuron navigator 3                                                                                        |          |
| 207134_x_at        | 7177           | <i>TPSAB1</i>        | 7.04E-02        | 0.41        | trypsin alpha/beta 1                                                                                      |          |
|                    | 64499          | <i>TPSB2</i>         |                 |             | trypsin beta 2 (gene/pseudogene)                                                                          |          |
| 1552658_a_at       | 89795          | <i>NAV3</i>          | 7.00E-04        | 0.43        | neuron navigator 3                                                                                        |          |
| 217262_s_at        | 9620           | <i>CELSR1</i>        | 6.07E-02        | 0.46        | cadherin, EGF LAG seven-pass G-type receptor 1                                                            |          |
| 223204_at          | 51313          | <i>FAM198B</i>       | 1.31E-02        | 0.46        | family with sequence similarity 198, member B                                                             |          |
| 223317_at          | 84266          | <i>ALKBH7</i>        | 4.09E-02        | 0.47        | alkB homolog 7                                                                                            |          |
| 214978_s_at        | 8497           | <i>PPFIA4</i>        | 6.39E-02        | 0.48        | protein tyrosine phosphatase, receptor type, f polypeptide (PTPRF), interacting protein (liprin), alpha 4 |          |
| 1552546_a_at       | 137994         | <i>LETM2</i>         | 1.82E-02        | 0.48        | leucine zipper-EF-hand containing transmembrane protein 2                                                 |          |
| 219872_at          | 51313          | <i>FAM198B</i>       | 3.00E-04        | 0.50        | family with sequence similarity 198, member B                                                             |          |
| 231053_at          | 3745           | <i>KCNB1</i>         | 5.67E-02        | 0.51        | potassium channel, voltage gated Shab related subfamily B, member 1                                       |          |
| <b>201694_s_at</b> | <b>1958</b>    | <b><i>EGR1</i></b>   | <b>1.74E-02</b> | <b>0.51</b> | <b>early growth response 1</b>                                                                            |          |
| 218864_at          | 7145           | <i>TNS1</i>          | 4.60E-03        | 0.52        | tensin 1                                                                                                  |          |
| 204439_at          | 10964          | <i>IFI44L</i>        | 1.67E-02        | 0.52        | interferon-induced protein 44-like                                                                        |          |
| <b>227404_s_at</b> | <b>1958</b>    | <b><i>EGR1</i></b>   | <b>1.33E-02</b> | <b>0.53</b> | <b>early growth response 1</b>                                                                            |          |
| 202086_at          | 4599           | <i>MX1</i>           | 7.05E-02        | 0.53        | MX dynamin-like GTPase 1                                                                                  |          |
| 214453_s_at        | 10561          | <i>IFI44</i>         | 9.90E-03        | 0.54        | interferon-induced protein 44                                                                             |          |
| 206757_at          | 8654           | <i>PDE5A</i>         | 9.95E-02        | 0.55        | phosphodiesterase 5A, cGMP-specific                                                                       |          |
| 211006_s_at        | 3745           | <i>KCNB1</i>         | 2.14E-02        | 0.55        | potassium channel, voltage gated Shab related subfamily B, member 1                                       |          |
| 215649_s_at        | 4598           | <i>MVK</i>           | 1.80E-03        | 0.55        | mevalonate kinase                                                                                         |          |
| 204363_at          | 2152           | <i>F3</i>            | 5.74E-02        | 0.57        | coagulation factor III (thromboplastin, tissue factor)                                                    |          |
| 223749_at          | 114898         | <i>CIQTNF2</i>       | 2.83E-02        | 0.57        | CIq and tumor necrosis factor related protein 2                                                           |          |
| 206553_at          | 4939           | <i>OAS2</i>          | 8.63E-02        | 0.57        | 2'-5'-oligoadenylate synthetase 2                                                                         |          |
| 229337_at          | 9099           | <i>USP2</i>          | 7.04E-02        | 0.57        | ubiquitin specific peptidase 2                                                                            |          |
| 1556361_s_at       | 81573          | <i>ANKRD13C</i>      | 1.51E-02        | 0.58        | ankyrin repeat domain 13C                                                                                 |          |
| 220381_at          | 79822          | <i>ARHGAP28</i>      | 7.11E-02        | 0.58        | Rho GTPase activating protein 28                                                                          |          |
| 205552_s_at        | 4938           | <i>OAS1</i>          | 7.12E-02        | 0.58        | 2'-5'-oligoadenylate synthetase 1                                                                         |          |
| 232666_at          | 4940           | <i>OAS3</i>          | 4.19E-02        | 0.60        | 2'-5'-oligoadenylate synthetase 3                                                                         |          |
| 222071_s_at        | 353189         | <i>SLCO4C1</i>       | 3.53E-02        | 0.60        | solute carrier organic anion transporter family, member 4C1                                               |          |
| 233234_at          | 57528          | <i>KCTD16</i>        | 6.71E-02        | 0.61        | potassium channel tetramerization domain containing 16                                                    |          |
| 211520_s_at        | 2890           | <i>GRIA1</i>         | 6.15E-02        | 0.62        | glutamate receptor, ionotropic, AMPA 1                                                                    |          |
| 206825_at          | 5021           | <i>OXTTR</i>         | 1.60E-03        | 0.62        | oxytocin receptor                                                                                         |          |
| 237767_at          | 10160          | <i>FARP1</i>         | 5.51E-02        | 0.62        | FERM, ARH/RhoGEF and pleckstrin domain protein 1                                                          |          |
| 233907_s_at        | 56256          | <i>SERTAD4</i>       | 9.00E-03        | 0.62        | SERTA domain containing 4                                                                                 |          |
| 235315_at          | 8848           | <i>TSC22D1</i>       | 6.53E-02        | 0.62        | TSC22 domain family, member 1                                                                             |          |
| 204938_s_at        | 5350           | <i>PLN</i>           | 6.15E-02        | 0.63        | phospholamban                                                                                             |          |
| 237691_x_at        | 2027           | <i>ENO3</i>          | 1.51E-02        | 0.63        | enolase 3 (beta, muscle)                                                                                  |          |
| 204056_s_at        | 4598           | <i>MVK</i>           | 1.60E-03        | 0.63        | mevalonate kinase                                                                                         |          |
| 1559060_a_at       | 96459          | <i>FNIP1</i>         | 5.54E-02        | 0.63        | folliculin interacting protein 1                                                                          |          |
| 1554018_at         | 10457          | <i>GPNMB</i>         | 8.38E-02        | 0.64        | glycoprotein (transmembrane) nmb                                                                          |          |
| 240869_at          | 3745           | <i>KCNB1</i>         | 6.88E-02        | 0.64        | potassium channel, voltage gated Shab related subfamily B, member 1                                       |          |
| 1559449_a_at       | 9534           | <i>ZNF254</i>        | 5.51E-02        | 0.64        | zinc finger protein 254                                                                                   |          |
| 226603_at          | 219285         | <i>SAMD9L</i>        | 1.40E-02        | 0.64        | sterile alpha motif domain containing 9-like                                                              |          |
| 211018_at          | 4047           | <i>LSS</i>           | 6.70E-03        | 0.65        | lanosterol synthase (2,3-oxidosqualene-lanosterol cyclase)                                                |          |
| 211019_s_at        | 4047           | <i>LSS</i>           | 1.70E-03        | 0.65        | lanosterol synthase (2,3-oxidosqualene-lanosterol cyclase)                                                |          |
| 227055_at          | 196410         | <i>METTL7B</i>       | 2.79E-02        | 0.65        | methyltransferase like 7B                                                                                 |          |
| 235544_x_at        | 284069         | <i>FAM171A2</i>      | 7.04E-02        | 0.65        | family with sequence similarity 171, member A2                                                            |          |
| 236344_at          | 5137           | <i>PDE1C</i>         | 1.40E-02        | 0.65        | phosphodiesterase 1C, calmodulin-dependent 70kDa                                                          |          |
| 235760_at          | 64324          | <i>NSD1</i>          | 4.41E-02        | 0.66        | nuclear receptor binding SET domain protein 1                                                             |          |
| 230708_at          | 144165         | <i>PRICKLE1</i>      | 2.70E-02        | 0.66        | prickle homolog 1                                                                                         |          |
| 229767_at          | 6904           | <i>TBCD</i>          | 1.07E-02        | 0.67        | tubulin folding cofactor D                                                                                |          |

---

**Indacaterol (18h)****(1 Probe Set  $\equiv$  1 Gene ID)**

| Affy Probe Set ID* | Entrez Gene ID | <i>Official Gene Symbol</i>     | <i>FDR P-Value</i> | <i>Fold change</i> | UniGene Name                        | Function |
|--------------------|----------------|---------------------------------|--------------------|--------------------|-------------------------------------|----------|
| 240876_x_at        | 145645         | <u><a href="#">C15orf43</a></u> | 9.51E-02           | 0.51               | chromosome 15 open reading frame 43 |          |

Transcripts used for real-time PCR validation are bolded and underlined.

\*Some genes are recognised by more than one probe set and some probe sets recognise more than one gene.



**Supplemental TABLE 5.** Functional Annotation Clustering of Genes Significantly Induced by Indacaterol in BEAS-2B Cells at 1h, 2h and 6h.

| <b>Indacaterol (1h)</b>      |                                                                                                               |                                                                                                                                                                                                                                                                                                                                                                                              |              |                |                  |  |
|------------------------------|---------------------------------------------------------------------------------------------------------------|----------------------------------------------------------------------------------------------------------------------------------------------------------------------------------------------------------------------------------------------------------------------------------------------------------------------------------------------------------------------------------------------|--------------|----------------|------------------|--|
| <b>Annotation Cluster</b>    | <b>Enrichment Score</b>                                                                                       | <b>Genes</b>                                                                                                                                                                                                                                                                                                                                                                                 | <b>Count</b> | <b>P-Value</b> | <b>Benjamini</b> |  |
| <b>Annotation Cluster 1</b>  | <b>Enrichment Score: 4.48</b>                                                                                 |                                                                                                                                                                                                                                                                                                                                                                                              |              |                |                  |  |
| GOTERM_BP_DIRECT             | negative regulation of transcription from RNA polymerase II promoter                                          | ATF3, BCL6, BHLHE40, BMP2, CITED2, EDN1, EFNA1, ETS2, FEZF2, FOXC2, HES1, ID1, ID3, KLF4, MYC, NFIL3, NR4A2, NR4A3, PRDM1, RUNX3, SNAI2, TCF21, TGIF1                                                                                                                                                                                                                                        | 23           | 4.30E-09       | 5.70E-06         |  |
| GOTERM_MF_DIRECT             | sequence-specific DNA binding                                                                                 | ATF3, BCL6, CSRN1, ESRRG, ETS2, FOSL2, FOXC1, FOXC2, HES1, IRX1, IRX2, KLF2, MAFF, MYC, NFIL3, NR4A1, NR4A2, NR4A3, SNAI2                                                                                                                                                                                                                                                                    | 19           | 1.10E-08       | 3.40E-06         |  |
| GOTERM_BP_DIRECT             | positive regulation of transcription from RNA polymerase II promoter                                          | ADRB2, ATF3, BMP2, CEBPD, CITED2, CSRN1, EDN1, ESRRG, ETS2, FEZF2, FOSL2, FOXC1, FOXC2, HES1, IL6, KLF2, KLF4, MAFF, MYC, NR4A1, NR4A2, NR4A3, RGCC, SERPINE1, SOX9, TCF21                                                                                                                                                                                                                   | 26           | 1.30E-08       | 8.40E-06         |  |
| GOTERM_MF_DIRECT             | transcription factor activity, sequence-specific DNA binding                                                  | ATF3, BCL6, BHLHE40, CEBPD, CITED2, CSRN1, ESRRG, ETS2, FOSL2, FOXC1, FOXC2, HES1, ID1, ID3, KLF2, KLF4, MAFF, MYC, NFIL3, PRDM1, RUNX3, SOX9, TGIF1, TSC22D1, ZFP36L1                                                                                                                                                                                                                       | 25           | 2.00E-08       | 3.10E-06         |  |
| GOTERM_MF_DIRECT             | transcriptional repressor activity, RNA polymerase II core promoter proximal region sequence-specific binding | ATF3, BHLHE40, ETS2, HES1, NFIL3, PRDM1, SNAI2, TCF21, TGIF1                                                                                                                                                                                                                                                                                                                                 | 9            | 8.40E-07       | 8.40E-05         |  |
| GOTERM_BP_DIRECT             | transcription from RNA polymerase II promoter                                                                 | ATF3, CEBPD, SRNP1, FEZF2, FOXC1, FOXC2, KLF4, MAFF, MYC, NFIL3, RUNX3, SOX9, TCF21, TSC22D1                                                                                                                                                                                                                                                                                                 | 14           | 5.90E-05       | 7.80E-03         |  |
| GOTERM_CC_DIRECT             | nucleus                                                                                                       | AKIP1, ANKRD37, ATF3, BCL6, BHLHE40, CEBPD, CITED2, CSNK1A1, CSRN1, DUSP1, DUSP4, DUSP5, ERFF1, ESRRG, ETS2, FAM71B, FEZF2, FOSL2, FOXC1, FOXC2, HES1, ID1, ID3, IRX1, IRX2, KLF2, KLF4, KLF6, MAFF, MYC, NEDD9, NFIL3, NR4A1, NR4A2, NR4A3, PRDM1, PYHIN1, RBFOX1, RGCC, RGS2, RUNX3, SGK1, SIK1, SNAI2, SOX9, SPIDR, SYNPO2, TCF21, TGIF1, TOB1, TSC22D1, ZFP36L1, ZNF331, ZNF385D, ZNF414 | 55           | 1.60E-04       | 2.00E-02         |  |
| GOTERM_BP_DIRECT             | transcription, DNA-templated                                                                                  | BBCL6, BHLHE40, CEBPD, CITED2, ESRRG, ETS2, FOSL2, HES1, ID1, ID3, KLF2, KLF6, NR4A1, NR4A2, NR4A3, PRDM1, SNAI2, TGIF1, ZNF331, ZNF414                                                                                                                                                                                                                                                      | 20           | 8.30E-02       | 6.90E-01         |  |
| GOTERM_CC_DIRECT             | nucleoplasm                                                                                                   | AKIP1, ATF3, BCL6, DUSP4, DUSP5, ESRRG, ETS2, FOSL2, FOXC1, HES1, ID1, ID3, KLF4, MAFF, MYC, NR4A1, NR4A2, NR4A3, PRDM1, SGK1, SOX9, SPIDR, TGIF1                                                                                                                                                                                                                                            | 23           | 1.80E-01       | 9.40E-01         |  |
| <b>Annotation Cluster 2</b>  | <b>Enrichment Score: 3.49</b>                                                                                 |                                                                                                                                                                                                                                                                                                                                                                                              |              |                |                  |  |
| GOTERM_BP_DIRECT             | cellular response to interleukin-1                                                                            | CCL20, EDN1, KLF2, HAS2, IL6, MYC, SOX9                                                                                                                                                                                                                                                                                                                                                      | 7            | 1.00E-05       | 2.20E-03         |  |
| GOTERM_BP_DIRECT             | cellular response to tumor necrosis factor                                                                    | CCL20, EDN1, KLF2, HAS2, IL6, ZNF36L1                                                                                                                                                                                                                                                                                                                                                        | 6            | 1.00E-03       | 6.30E-02         |  |
| GOTERM_BP_DIRECT             | positive regulation of nitric oxide biosynthetic process                                                      | EDN1, KLF2, KLF4, IL6                                                                                                                                                                                                                                                                                                                                                                        | 4            | 3.30E-03       | 1.10E-01         |  |
| <b>Annotation Cluster 3</b>  | <b>Enrichment Score: 3.24</b>                                                                                 |                                                                                                                                                                                                                                                                                                                                                                                              |              |                |                  |  |
| GOTERM_BP_DIRECT             | neural crest cell development                                                                                 | EDN1, FOXC1, FOXC2, SNAI2, SOX9                                                                                                                                                                                                                                                                                                                                                              | 5            | 1.50E-06       | 6.70E-04         |  |
| GOTERM_BP_DIRECT             | Notch signaling pathway                                                                                       | BMP2, FOXC1, FOXC2, HES1, MYC, SNAI2, SOX9                                                                                                                                                                                                                                                                                                                                                   | 7            | 1.50E-04       | 1.50E-02         |  |
| GOTERM_MF_DIRECT             | transcription factor activity, RNA polymerase II distal enhancer sequence-specific binding                    | BHLHE40, FOXC1, FOXC2, SNAI2, SOX9                                                                                                                                                                                                                                                                                                                                                           | 5            | 1.00E-03       | 3.80E-02         |  |
| GOTERM_BP_DIRECT             | ossification                                                                                                  | CTGF, FOXC1, FOXC2, RUNX3, SOX9                                                                                                                                                                                                                                                                                                                                                              | 5            | 2.40E-03       | 9.30E-02         |  |
| GOTERM_MF_DIRECT             | RNA polymerase II transcription factor activity, sequence-specific DNA binding                                | BHLHE40, FOXC1, RUNX3, SOX9                                                                                                                                                                                                                                                                                                                                                                  | 4            | 1.10E-01       | 7.10E-01         |  |
| <b>Annotation Cluster 4</b>  | <b>Enrichment Score: 3.17</b>                                                                                 |                                                                                                                                                                                                                                                                                                                                                                                              |              |                |                  |  |
| GOTERM_BP_DIRECT             | regulation of transcription from RNA polymerase II promoter                                                   | ATL3, FASL2, MAFF, RUNX3                                                                                                                                                                                                                                                                                                                                                                     | 4            | 6.00E-01       | 1.00E+00         |  |
| <b>Annotation Cluster 5</b>  | <b>Enrichment Score: 2.52</b>                                                                                 |                                                                                                                                                                                                                                                                                                                                                                                              |              |                |                  |  |
| GOTERM_BP_DIRECT             | positive regulation of epithelial cell proliferation                                                          | CSAR1, ID1, IL6, MYC, NR4A3, SOX9                                                                                                                                                                                                                                                                                                                                                            | 6            | 6.10E-05       | 7.30E-03         |  |
| GOTERM_BP_DIRECT             | positive regulation of smooth muscle cell proliferation                                                       | EDN1, IL6, MYC, NR4A3                                                                                                                                                                                                                                                                                                                                                                        | 4            | 8.50E-03       | 2.00E-01         |  |
| <b>Annotation Cluster 6</b>  | <b>Enrichment Score: 2.18</b>                                                                                 |                                                                                                                                                                                                                                                                                                                                                                                              |              |                |                  |  |
| GOTERM_BP_DIRECT             | cell-cell signaling                                                                                           | ADRB2, AREG, BDNF, BMP2, CCL20, CTGF, EFNA1, EDN1, NTF3                                                                                                                                                                                                                                                                                                                                      | 9            | 4.00E-04       | 3.30E-02         |  |
| GOTERM_MF_DIRECT             | growth factor activity                                                                                        | AREG, BDNF, BMP2, CTGF, IL6, NTF3                                                                                                                                                                                                                                                                                                                                                            | 6            | 4.90E-03       | 1.10E-01         |  |
| GOTERM_MF_DIRECT             | cytokine activity                                                                                             | AREG, EDN1, IL6, BMP2                                                                                                                                                                                                                                                                                                                                                                        | 4            | 1.20E-01       | 7.10E-01         |  |
| <b>Annotation Cluster 7</b>  | <b>Enrichment Score: 2.14</b>                                                                                 |                                                                                                                                                                                                                                                                                                                                                                                              |              |                |                  |  |
| GOTERM_BP_DIRECT             | Notch signaling pathway                                                                                       | BMP2, FOXC1, FOXC2, HES1, MYC, SNAI2, SOX9                                                                                                                                                                                                                                                                                                                                                   | 7            | 1.50E-04       | 1.50E-02         |  |
| GOTERM_BP_DIRECT             | epithelial to mesenchymal transition                                                                          | BMP2, SNAI2, SOX9                                                                                                                                                                                                                                                                                                                                                                            | 3            | 2.30E-02       | 3.90E-01         |  |
| GOTERM_BP_DIRECT             | negative regulation of canonical Wnt signaling pathway                                                        | BMP2, CSNK1A1, SNAI2, SOX9                                                                                                                                                                                                                                                                                                                                                                   | 4            | 1.10E-01       | 7.50E-01         |  |
| <b>Annotation Cluster 8</b>  | <b>Enrichment Score: 2.12</b>                                                                                 |                                                                                                                                                                                                                                                                                                                                                                                              |              |                |                  |  |
| GOTERM_BP_DIRECT             | cellular response to corticotropin-releasing hormone stimulus                                                 | NR4A1, NR4A2, NR4A3                                                                                                                                                                                                                                                                                                                                                                          | 3            | 7.10E-04       | 4.80E-02         |  |
| GOTERM_BP_DIRECT             | fat cell differentiation                                                                                      | CEBPD, KLF4, NR4A1, NR4A2, NR4A3                                                                                                                                                                                                                                                                                                                                                             | 5            | 1.70E-03       | 7.60E-02         |  |
| GOTERM_MF_DIRECT             | steroid hormone receptor activity                                                                             | ESRRG, NR4A1, NR4A2, NR4A3                                                                                                                                                                                                                                                                                                                                                                   | 4            | 6.40E-03       | 1.40E-01         |  |
| GOTERM_BP_DIRECT             | steroid hormone mediated signaling pathway                                                                    | ESRRG, NR4A1, NR4A2, NR4A3                                                                                                                                                                                                                                                                                                                                                                   | 4            | 7.30E-03       | 1.90E-01         |  |
| GOTERM_BP_DIRECT             | transcription initiation from RNA polymerase II promoter                                                      | CTGF, ESRRG, NR4A1, NR4A2, NR4A3                                                                                                                                                                                                                                                                                                                                                             | 5            | 2.20E-02       | 3.80E-01         |  |
| GOTERM_MF_DIRECT             | RNA polymerase II transcription factor activity, ligand-activated sequence-specific DNA binding               | NR4A1, NR4A2, NR4A3                                                                                                                                                                                                                                                                                                                                                                          | 3            | 2.50E-02       | 3.30E-01         |  |
| GOTERM_BP_DIRECT             | intracellular receptor signaling pathway                                                                      | NR4A1, NR4A2, NR4A3                                                                                                                                                                                                                                                                                                                                                                          | 3            | 2.90E-02       | 4.30E-01         |  |
| GOTERM_MF_DIRECT             | zinc ion binding                                                                                              | ADAMTS1, ADAMTS15, ESRRG, KLF4, NR4A1, NR4A2, NR4A3, ZNF331, ZNF385D                                                                                                                                                                                                                                                                                                                         | 9            | 5.40E-01       | 1.00E+00         |  |
| <b>Annotation Cluster 9</b>  | <b>Enrichment Score: 2.08</b>                                                                                 |                                                                                                                                                                                                                                                                                                                                                                                              |              |                |                  |  |
| GOTERM_BP_DIRECT             | negative regulation of sequence-specific DNA binding transcription factor activity                            | BHLHE40, ID1, ID3, TRIB1                                                                                                                                                                                                                                                                                                                                                                     | 4            | 8.50E-03       | 2.00E-01         |  |
| GOTERM_MF_DIRECT             | E-box binding                                                                                                 | BHLHE40, TCF21, MYC                                                                                                                                                                                                                                                                                                                                                                          | 3            | 2.20E-02       | 3.10E-01         |  |
| GOTERM_MF_DIRECT             | transcription factor binding                                                                                  | ID1, ID3, FOXC1, HES1, MYC, TRIB1                                                                                                                                                                                                                                                                                                                                                            | 6            | 4.40E-02       | 4.30E-01         |  |
| GOTERM_MF_DIRECT             | protein dimerization activity                                                                                 | ID3, MYC, SLC24A2, TRIB1                                                                                                                                                                                                                                                                                                                                                                     | 4            | 8.10E-02       | 6.40E-01         |  |
| <b>Annotation Cluster 10</b> | <b>Enrichment Score: 1.66</b>                                                                                 |                                                                                                                                                                                                                                                                                                                                                                                              |              |                |                  |  |
| GOTERM_BP_DIRECT             | peptidyl-threonine dephosphorylation                                                                          | DUSP1, DUSP4, DUSP5                                                                                                                                                                                                                                                                                                                                                                          | 3            | 2.50E-03       | 9.40E-02         |  |
| GOTERM_BP_DIRECT             | endoderm formation                                                                                            | DUSP1, DUSP4, DUSP5                                                                                                                                                                                                                                                                                                                                                                          | 3            | 3.00E-03       | 1.10E-01         |  |
| GOTERM_MF_DIRECT             | MAP kinase tyrosine/serine/threonine phosphatase activity                                                     | DUSP1, DUSP4, DUSP5                                                                                                                                                                                                                                                                                                                                                                          | 3            | 3.40E-03       | 8.80E-02         |  |
| GOTERM_BP_DIRECT             | inactivation of MAPK activity                                                                                 | DUSP1, DUSP4, DUSP5                                                                                                                                                                                                                                                                                                                                                                          | 3            | 1.30E-02       | 2.80E-01         |  |
| GOTERM_BP_DIRECT             | peptidyl-tyrosine dephosphorylation                                                                           | DUSP1, DUSP4, DUSP5                                                                                                                                                                                                                                                                                                                                                                          | 3            | 1.50E-01       | 8.50E-01         |  |
| GOTERM_MF_DIRECT             | protein tyrosine phosphatase activity                                                                         | DUSP1, DUSP4, DUSP5                                                                                                                                                                                                                                                                                                                                                                          | 3            | 1.50E-01       | 7.70E-01         |  |
| <b>Annotation Cluster 11</b> | <b>Enrichment Score: 1.51</b>                                                                                 |                                                                                                                                                                                                                                                                                                                                                                                              |              |                |                  |  |
| GOTERM_BP_DIRECT             | positive regulation of ERK1 and ERK2 cascade                                                                  | ACKR3, BMP3, CSAR1, CCL20, CTGF, IL6, SPRY2                                                                                                                                                                                                                                                                                                                                                  | 7            | 1.40E-03       | 7.00E-02         |  |
| GOTERM_BP_DIRECT             | response to lipopolysaccharide                                                                                | CSAR1, CXCL2, CXCL3, EDN1, IL12RB2, TRIB1                                                                                                                                                                                                                                                                                                                                                    | 6            | 5.80E-03       | 1.60E-01         |  |
| GOTERM_BP_DIRECT             | positive regulation of neutrophil chemotaxis                                                                  | CSAR1, CXCL2, CXCL3                                                                                                                                                                                                                                                                                                                                                                          | 3            | 1.00E-02       | 2.30E-01         |  |
| GOTERM_BP_DIRECT             | chemokine-mediated signaling pathway                                                                          | ACKR3, CCL20, CXCL2, CXCL3                                                                                                                                                                                                                                                                                                                                                                   | 4            | 1.30E-02       | 2.80E-01         |  |
| GOTERM_MF_DIRECT             | chemokine activity                                                                                            | CCL20, CXCL2, CXCL3                                                                                                                                                                                                                                                                                                                                                                          | 3            | 4.30E-02       | 4.40E-01         |  |
| GOTERM_BP_DIRECT             | inflammatory response                                                                                         | BCL6, BMP2, CSAR1, CCL20, CXCL2, CXCL3, IL6                                                                                                                                                                                                                                                                                                                                                  | 7            | 4.90E-02       | 5.60E-01         |  |
| GOTERM_BP_DIRECT             | chemotaxis                                                                                                    | ACKR3, CSAR1, CXCL2, CCL20                                                                                                                                                                                                                                                                                                                                                                   | 4            | 5.40E-02       | 5.80E-01         |  |
| GOTERM_BP_DIRECT             | immune response                                                                                               | CSAR1, CCL20, CXCL2, CXCL3, IL6, NFIL3, SH2D6                                                                                                                                                                                                                                                                                                                                                | 7            | 7.40E-02       | 6.60E-01         |  |
| GOTERM_BP_DIRECT             | cell chemotaxis                                                                                               | CSAR1, CCL20, CXCL2                                                                                                                                                                                                                                                                                                                                                                          | 3            | 7.50E-02       | 6.60E-01         |  |
| GOTERM_BP_DIRECT             | G-protein coupled receptor signaling pathway                                                                  | ACKR3, AREG, CCL20, CXCL2, CXCL3, EDN1                                                                                                                                                                                                                                                                                                                                                       | 6            | 7.60E-01       | 1.00E+00         |  |



## Indacaterol (2h)

| Annotation Cluster 1        | Enrichment Score: 7.64                                                                                        | Genes                                                                                                                                                                                                                                                                                                                                                                                                                                                                                                                                                                                                                                                                                                                                                                                                                                                                             | Count        | P-Value        | Benjamini        |
|-----------------------------|---------------------------------------------------------------------------------------------------------------|-----------------------------------------------------------------------------------------------------------------------------------------------------------------------------------------------------------------------------------------------------------------------------------------------------------------------------------------------------------------------------------------------------------------------------------------------------------------------------------------------------------------------------------------------------------------------------------------------------------------------------------------------------------------------------------------------------------------------------------------------------------------------------------------------------------------------------------------------------------------------------------|--------------|----------------|------------------|
| UP_SEQ_FEATURE              | DNA-binding region:Basic motif                                                                                | ATF3, BHLHE40, CE2BP, CE2BD, CREB3L2, EPAS1, FOS, FOSB, FOSL2, HES1, JUNB, MAFF, MAFK, MYC, NFIL3, PHTF2, TCF21                                                                                                                                                                                                                                                                                                                                                                                                                                                                                                                                                                                                                                                                                                                                                                   | 17           | 4.90E-09       | 4.60E-06         |
| <b>Annotation Cluster 2</b> | <b>Enrichment Score: 6.81</b>                                                                                 | <b>Genes</b>                                                                                                                                                                                                                                                                                                                                                                                                                                                                                                                                                                                                                                                                                                                                                                                                                                                                      | <b>Count</b> | <b>P-Value</b> | <b>Benjamini</b> |
| GOTERM_BP_DIRECT            | positive regulation of transcription from RNA polymerase II promoter                                          | ATF3, ATXN7, BMP2, CE2BP, CE2BD, CITED4, CREB3L2, EDN1, EPAS1, ETS2, FGFR2, FOS, FOSB, FOSL2, FOXO1, FOXO2, FOXO1, FSTL3, GREM1, HES1, HOXA5, IL6, IL11, INHBA, JAG1, JUNB, KLF4, LPIN1, MAFF, MAFK, MEF2D, MYC, NFATC1, NOG, NR4A1, NR4A2, NR4A3, PPARGC1A, PROX2, REL, RGCC, SERPINE1, SIX2, SMAD2, SOX4, SOX9, TCF21, TFAP2A, TFAP2C, VGLL2, WNT5A, ZBTB38, ZNF462                                                                                                                                                                                                                                                                                                                                                                                                                                                                                                             | 53           | 3.20E-13       | 7.50E-10         |
| GOTERM_MF_DIRECT            | transcriptional activator activity, RNA polymerase II core promoter proximal region sequence-specific binding | CE2BP, CE2BD, CREB3L2, EPAS1, FOS, FOSB, FOXO2, HOXA5, JUNB, KLF4, MEF2D, MYC, NR4A1, NR4A2, NR4A3, SIX2, SMAD2, SOX4, SOX9, TCF21, TFAP2A, TFAP2C                                                                                                                                                                                                                                                                                                                                                                                                                                                                                                                                                                                                                                                                                                                                | 22           | 8.60E-10       | 4.40E-07         |
| GOTERM_BP_DIRECT            | transcription from RNA polymerase II promoter                                                                 | ATF3, CE2BP, CE2BD, CREB3L2, CTDP1, EPAS1, FOS, FOSB, FOXO1, FOXO2, HIVEP1, HIVEP2, HIVEP3, HOXA5, JUNB, KLF4, MAFF, MAFK, MEF2D, MYC, NFATC1, NFIL3, REL, RUNX3, SIX2, SMAD2, SOX4, SOX9, TCF21, TFAP2A, TFAP2C, TSC22D1                                                                                                                                                                                                                                                                                                                                                                                                                                                                                                                                                                                                                                                         | 32           | 1.40E-09       | 1.10E-06         |
| GOTERM_MF_DIRECT            | transcription factor activity, sequence-specific DNA binding                                                  | ATF3, BCL6, BHLHE40, BNC1, CE2BP, CE2BD, CREB3L2, EPAS1, ETS2, FOS, FOSB, FOSL2, FOXO1, FOXO2, HES1, HIVEP2, HIVEP3, HOXA5, ID3, KLF3, KLF4, KLF9, MAFF, MAFK, MEF2D, MYC, NFATC1, NFIL3, NR2F2, PRDM1, REL, RUNX3, SIX2, SMAD2, SOX4, SOX9, TBX3, TFAP2A, TFAP2C, TGIF1, TSC22D1, WNT5A, ZBTB38                                                                                                                                                                                                                                                                                                                                                                                                                                                                                                                                                                                  | 43           | 2.50E-08       | 4.30E-06         |
| GOTERM_CC_DIRECT            | nucleus                                                                                                       | ANKRD37, AREG, ARID5B, ATF3, ATXN7, BAG1, BCL6, BCOR, BHLHE40, BNC1, BTG1, C8orf4, C9orf72, C15orf48, CASP9, CDKN1C, CE2BP, CE2BD, CITED4, CPEB4, CREB3L2, CSNK1E, CTDP1, DGKD, DLC1, DUSP1, DUSP4, EPAS1, ERFF1, ETS2, FERMT2, FGFR2, FILIP1L, FOS, FOSB, FOSL2, FOXO1, FOXO2, FOXO1, FSTL3, GDF15, GEM, HERC4, HES1, HIVEP1, HIVEP2, HIVEP3, HLX, HOXA5, ID3, IGFBP3, ING1, IRF2BP2, IRX1, IRX2, IRX4, ISG20, JMY, JUP, KLF3, KLF6, KLF9, LATS2, LBH, LMCD1, LPIN1, MAFF, MAFK, MBP, MEF2D, MYC, NEDD9, NFATC1, NFIL3, NFKBIZ, NR2F2, NR4A1, NR4A2, NR4A3, PHTF2, PIP5K1A, PMAIP1, PPARGC1A, PPM1D, PRDM1, PRKCE, PROX2, PTP4A1, REL, RGCC, RGS2, RHOB, RUNX3, SGK1, SH3BP4, SIK1, SIK2, SIX2, SLC2A14, SMAD2, SNAI2, SNRK, SOX4, SOX9, SPRY2, STC1, TBX3, TCF21, TFAP2A, TFAP2C, TGIF1, TLE1, TLE3, TNFAIP3, TRIB1, TSC22D1, USP36, VGLL2, WW1, ZBTB38, ZNF331, ZNF462, ZNF503 | 123          | 2.90E-06       | 7.10E-04         |
| GOTERM_CC_DIRECT            | nucleoplasm                                                                                                   | A1CF, ARID5B, ATF3, ATXN7, BCL6, BNC1, C9orf72, CREB3L2, CSNK1E, CTDP1, DUSP4, DUSP5, ELL2, EPAS1, ETS2, FERMT2, FGFR2, FOS, FOSL2, FOXO1, FOXO1, FSTL3, HES1, HIVEP2, ID3, IL15, ING1, ISG20, JMY, JUNB, KLF4, KLF9, LMCD1, LPIN1, MAFF, MAFK, MCTP2, MEF2D, MYC, NFATC1, NR4A1, NR4A2, NR4A3, PKFB3, PIP5K1A, PPARGC1A, PRDM1, REL, SAP30, SGK1, SIX2, SMAD2, SOX4, SOX9, SPIDR, TFAP2A, TFAP2C, TGIF1, TLE1, TLE3, USP2, USP48                                                                                                                                                                                                                                                                                                                                                                                                                                                 | 62           | 4.30E-03       | 1.40E-01         |
| GOTERM_BP_DIRECT            | transcription, DNA-templated                                                                                  | ARID5B, ATXN7, BCL6, BCOR, BHLHE40, BNC1, CE2BP, CE2BD, CITED4, EPAS1, ERN1, ETS2, FOSL2, FOXO1, FSTL3, HES1, HLX, ID3, IRF2BP2, KLF3, KLF6, KLF9, LBH, LMCD1, LPIN1, MAFK, MEF2D, MN1, NFKBIZ, NR2F2, NR4A1, NR4A2, NR4A3, PHTF2, PRDM1, PROX2, SAP30, SMAD2, SNAI2, TBX3, TGIF1, TLE1, TLE3, VGLL2, WW1, ZBTB38, ZNF331, ZNF462, ZNF503                                                                                                                                                                                                                                                                                                                                                                                                                                                                                                                                         | 49           | 7.50E-03       | 1.80E-01         |
| <b>Annotation Cluster 3</b> | <b>Enrichment Score: 3.73</b>                                                                                 | <b>Genes</b>                                                                                                                                                                                                                                                                                                                                                                                                                                                                                                                                                                                                                                                                                                                                                                                                                                                                      | <b>Count</b> | <b>P-Value</b> | <b>Benjamini</b> |
| GOTERM_BP_DIRECT            | neural crest cell development                                                                                 | EDN1, FOXO1, FOXO2, SNAI2, SOX9                                                                                                                                                                                                                                                                                                                                                                                                                                                                                                                                                                                                                                                                                                                                                                                                                                                   | 5            | 5.50E-05       | 7.40E-03         |
| GOTERM_MF_DIRECT            | transcription factor activity, RNA polymerase II distal enhancer sequence-specific binding                    | BHLHE40, CE2BP, FOXO1, FOXO2, NFATC1, SNAI2, SOX9, VGLL2                                                                                                                                                                                                                                                                                                                                                                                                                                                                                                                                                                                                                                                                                                                                                                                                                          | 8            | 1.40E-04       | 7.00E-03         |
| GOTERM_BP_DIRECT            | Notch signaling pathway                                                                                       | BMP2, CE2BP, FOXO1, FOXO2, HES1, JAG1, MYC, SNAI2, SOX9                                                                                                                                                                                                                                                                                                                                                                                                                                                                                                                                                                                                                                                                                                                                                                                                                           | 9            | 8.60E-04       | 3.80E-02         |
| <b>Annotation Cluster 4</b> | <b>Enrichment Score: 3.41</b>                                                                                 | <b>Genes</b>                                                                                                                                                                                                                                                                                                                                                                                                                                                                                                                                                                                                                                                                                                                                                                                                                                                                      | <b>Count</b> | <b>P-Value</b> | <b>Benjamini</b> |
| GOTERM_MF_DIRECT            | growth factor activity                                                                                        | AREG, BDNF, BMP2, CTGF, DKK1, FGF9, DF15, HBEGF, IL6, IL11, INHBA, JAG1, NTF3, VEGFC                                                                                                                                                                                                                                                                                                                                                                                                                                                                                                                                                                                                                                                                                                                                                                                              | 14           | 4.80E-06       | 4.90E-04         |
| GOTERM_BP_DIRECT            | cell-cell signaling                                                                                           | AREG, BDNF, BMP2, CCL20, CTGF, EDN1, EFNA1, FGF9, FGFR2, GDF15, GREM1, IL11, IL15, INHBA, NTF3, TFAP2C                                                                                                                                                                                                                                                                                                                                                                                                                                                                                                                                                                                                                                                                                                                                                                            | 16           | 3.70E-05       | 5.70E-03         |
| GOTERM_MF_DIRECT            | cytokine activity                                                                                             | AREG, BMP2, EDN1, GDF15, GREM1, IL6, IL11, IL15, INHBA, WNT5A                                                                                                                                                                                                                                                                                                                                                                                                                                                                                                                                                                                                                                                                                                                                                                                                                     | 10           | 3.50E-03       | 1.10E-01         |
| <b>Annotation Cluster 5</b> | <b>Enrichment Score: 3.34</b>                                                                                 | <b>Genes</b>                                                                                                                                                                                                                                                                                                                                                                                                                                                                                                                                                                                                                                                                                                                                                                                                                                                                      | <b>Count</b> | <b>P-Value</b> | <b>Benjamini</b> |
| GOTERM_BP_DIRECT            | cell fate commitment                                                                                          | BMP2, FGFR2, GAS1, PRDM1, SMAD2, SPRY2, WNT4, WNT5A                                                                                                                                                                                                                                                                                                                                                                                                                                                                                                                                                                                                                                                                                                                                                                                                                               | 8            | 1.30E-05       | 2.90E-03         |
| GOTERM_BP_DIRECT            | epithelial to mesenchymal transition                                                                          | BMP2, FGFR2, NOG, SNAI2, SOX9, WNT4, WNT5A                                                                                                                                                                                                                                                                                                                                                                                                                                                                                                                                                                                                                                                                                                                                                                                                                                        | 7            | 2.30E-05       | 4.00E-03         |
| <b>Annotation Cluster 6</b> | <b>Enrichment Score: 2.16</b>                                                                                 | <b>Genes</b>                                                                                                                                                                                                                                                                                                                                                                                                                                                                                                                                                                                                                                                                                                                                                                                                                                                                      | <b>Count</b> | <b>P-Value</b> | <b>Benjamini</b> |
| GOTERM_CC_DIRECT            | integral component of plasma membrane                                                                         | BDKRB2, CSAR1, CD200, CD55, CLDN1, DLCK1, EFNA1, FGFR2, GPRC5A, GPR37, HBEGF, HLA-DQA1, HS6ST1, IGF1R, IL15, IL1RAP, JAG1, KCNJ2, KCNK1, KCNK15, NPC1, PAG1, PLAUR, PLPP3, PLXNA2, RAPGEF2, SCARAS, SEMA6D, SLC2A3, SLC7A1, SLC7A2, SLC7A5, SLC7A11, SLC16A6, SLC19A2, SLC22A4, SLC22A5, SLC26A2, SLC38A2, SLC40A1, STEAP4, TFR, THBD, TRABD2A, TM4SF1                                                                                                                                                                                                                                                                                                                                                                                                                                                                                                                            | 45           | 1.20E-05       | 1.40E-03         |
| GOTERM_CC_DIRECT            | extracellular space                                                                                           | ADAMTS15, AREG, B4GALT1, BMP2, C9orf72, CCL2, CCL20, CES3, CTGF, CXCL2, DKK1, DMBT1, EDN1, FGF9, FSTL3, GDF15, GREM1, HBEGF, IGFBP3, IGFBP4, IL6, IL6R, IL11, IL15, KIT, LMCD1, LPL, LYPD3, METRNL, NOG, PAPP, SERPINE1, SMPDL3A, STC1, STC2, TFR, THBD, ULBP2, VEGFC, WNT4, WNT5A                                                                                                                                                                                                                                                                                                                                                                                                                                                                                                                                                                                                | 41           | 8.30E-05       | 6.70E-03         |
| GOTERM_CC_DIRECT            | extracellular region                                                                                          | BDNF, BMP2, CCL2, CCL20, CD55, CHSY1, CRISPLD2, CTGF, CXCL2, DKK1, DMBT1, EDN1, EFNA1, FGF9, FGFR2, FSTL3, GDF15, HBEGF, IGFBP3, IGFBP4, IL6, IL6R, IL11, IL15, IL1RAP, INHBA, JAG1, LPL, MFAP5, NOG, NPC1, NTF3, PAPP, SERPINE1, STC2, TFR, VEGFC, WNT4, WNT5A                                                                                                                                                                                                                                                                                                                                                                                                                                                                                                                                                                                                                   | 39           | 8.20E-03       | 2.00E-01         |

|                              |                                                                                                 |                                                                                                                                                                                                                                                                                                                                                                                                                                                                                                                                                        |    |          |          |
|------------------------------|-------------------------------------------------------------------------------------------------|--------------------------------------------------------------------------------------------------------------------------------------------------------------------------------------------------------------------------------------------------------------------------------------------------------------------------------------------------------------------------------------------------------------------------------------------------------------------------------------------------------------------------------------------------------|----|----------|----------|
| GOTERM_CC_DIRECT             | integral component of membrane                                                                  | ACKR3, AREG, BAGALT1, BDKRB2, BDNF, C15orf48, CD200, CD274, CHSY1, CLDN1, CREB3L2, EVA1C, FAM87A, FGFR2, FLVCR2, GALNT15, GAS1, GCNT2, GPAT3, GPRC5A, HLA-DQA1, HRK, HS3ST1, HS6ST1, IGF1R, IL1RAP, IL6R, JAG1, KCNK1, KIT, LRRC8A, LYPD3, MARC1, MCTP2, MEGF9, NPC1, PAPP, PCDH9, PHLDB2, PHTF2, PLAUR, RNF19A, SEMA6D, SHISA2, SIRPA, SLC2A3, SLC2A14, SLC7A1, SLC7A5, SLC7A11, SLC10A7, SLC16A6, SLC16A14, SLC19A2, SLC22A4, SLC22A5, SLC26A2, SLC30A1, SLC38A2, SLC4A1, SMAD2, ST3GAL1, ST3GAL4, ST3GAL6, STEAP4, SUSDB, TFR, TM4SF1, TMFM7, WNT5A | 70 | 9.60E-01 | 1.00E+00 |
| <b>Annotation Cluster 7</b>  |                                                                                                 | <b>Enrichment Score: 2.05</b>                                                                                                                                                                                                                                                                                                                                                                                                                                                                                                                          |    |          |          |
| GOTERM_BP_DIRECT             | amino acid transport                                                                            | MYC, SLC7A1, SLC7A2, SLC7A5, SLC7A11, SLC38A2                                                                                                                                                                                                                                                                                                                                                                                                                                                                                                          | 6  | 3.20E-04 | 2.10E-02 |
| GOTERM_MF_DIRECT             | amino acid transmembrane transporter activity                                                   | SLC7A1, SLC7A2, SLC7A5, SLC7A11, SLC38A2                                                                                                                                                                                                                                                                                                                                                                                                                                                                                                               | 5  | 8.60E-03 | 2.30E-01 |
| GOTERM_MF_DIRECT             | antiporter activity                                                                             | SLC7A1, SLC7A2, SLC7A5                                                                                                                                                                                                                                                                                                                                                                                                                                                                                                                                 | 3  | 5.00E-02 | 5.30E-01 |
| GOTERM_BP_DIRECT             | transport                                                                                       | ATP1B3, NPTX1, SLC7A1, SLC7A2, SLC7A5, SLC19A2,                                                                                                                                                                                                                                                                                                                                                                                                                                                                                                        | 6  | 7.20E-01 | 1.00E+00 |
| <b>Annotation Cluster 8</b>  |                                                                                                 | <b>Enrichment Score: 1.98</b>                                                                                                                                                                                                                                                                                                                                                                                                                                                                                                                          |    |          |          |
| KEGG_PATHWAY                 | TNF signaling pathway                                                                           | CCL2, CCL20, CREB3L2, CXCL2, EDN1, FOS, IL6, IL15, JUNB, MAP3K8, SOCS3, TNFAIP3                                                                                                                                                                                                                                                                                                                                                                                                                                                                        | 12 | 1.80E-05 | 3.40E-03 |
| KEGG_PATHWAY                 | Rheumatoid arthritis                                                                            | CCL2, CCL20, FOS, IL6, IL11, IL15, HLA-DQA1                                                                                                                                                                                                                                                                                                                                                                                                                                                                                                            | 7  | 1.20E-02 | 2.00E-01 |
| <b>Annotation Cluster 9</b>  |                                                                                                 | <b>Enrichment Score: 1.80</b>                                                                                                                                                                                                                                                                                                                                                                                                                                                                                                                          |    |          |          |
| GOTERM_BP_DIRECT             | neutrophil chemotaxis                                                                           | CSAR1, CCL2, CCL20, EDN1, PDE4B, PDE4D                                                                                                                                                                                                                                                                                                                                                                                                                                                                                                                 | 6  | 5.60E-03 | 1.50E-01 |
| GOTERM_BP_DIRECT             | cellular response to interleukin-1                                                              | CCL2, CCL20, EDN1, IL6, MYC, SOX9                                                                                                                                                                                                                                                                                                                                                                                                                                                                                                                      | 6  | 7.60E-03 | 1.80E-01 |
| GOTERM_BP_DIRECT             | response to amino acid                                                                          | CCL2, CTGF, EDN1, IL6                                                                                                                                                                                                                                                                                                                                                                                                                                                                                                                                  | 4  | 1.60E-02 | 2.80E-01 |
| GOTERM_BP_DIRECT             | cellular response to interferon-gamma                                                           | CCL2, CCL20, EDN1, MYC, WNT5A                                                                                                                                                                                                                                                                                                                                                                                                                                                                                                                          | 5  | 1.70E-02 | 2.90E-01 |
| GOTERM_BP_DIRECT             | cellular response to drug                                                                       | CCL2, EDN1, MYC, PDE4B, TFR                                                                                                                                                                                                                                                                                                                                                                                                                                                                                                                            | 5  | 3.10E-02 | 4.10E-01 |
| GOTERM_BP_DIRECT             | cellular response to tumor necrosis factor                                                      | CEBPA, CCL2, CCL20, EDN1, IL6, PPARGC1A                                                                                                                                                                                                                                                                                                                                                                                                                                                                                                                | 6  | 4.20E-02 | 4.80E-01 |
| <b>Annotation Cluster 10</b> |                                                                                                 | <b>Enrichment Score: 1.75</b>                                                                                                                                                                                                                                                                                                                                                                                                                                                                                                                          |    |          |          |
| INTERPRO                     | Major facilitator superfamily domain                                                            | FLVCR2, SLC2A3, SLC2A14, SLC16A6, SLC16A14, SLC19A2, SLC22A4, SLC22A5, SLC04A1                                                                                                                                                                                                                                                                                                                                                                                                                                                                         | 9  | 1.70E-03 | 1.80E-01 |
| GOTERM_MF_DIRECT             | transmembrane transporter activity                                                              | SLC2A3, SLC2A14, SLC22A5                                                                                                                                                                                                                                                                                                                                                                                                                                                                                                                               | 3  | 2.10E-01 | 8.40E-01 |
| <b>Annotation Cluster 11</b> |                                                                                                 | <b>Enrichment Score: 1.52</b>                                                                                                                                                                                                                                                                                                                                                                                                                                                                                                                          |    |          |          |
| GOTERM_BP_DIRECT             | cellular response to corticotropin-releasing hormone stimulus                                   | NR4A1, NR4A2, NR4A3                                                                                                                                                                                                                                                                                                                                                                                                                                                                                                                                    | 3  | 4.30E-03 | 1.30E-01 |
| GOTERM_MF_DIRECT             | RNA polymerase II transcription factor activity, ligand-activated sequence-specific DNA binding | NR2F2, NR4A1, NR4A2, NR4A3                                                                                                                                                                                                                                                                                                                                                                                                                                                                                                                             | 4  | 2.40E-02 | 3.90E-01 |
| GOTERM_BP_DIRECT             | intracellular receptor signaling pathway                                                        | NR2F2, NR4A1, NR4A2, NR4A3                                                                                                                                                                                                                                                                                                                                                                                                                                                                                                                             | 4  | 2.80E-02 | 3.80E-01 |
| GOTERM_MF_DIRECT             | steroid hormone receptor activity                                                               | NR2F2, NR4A1, NR4A2, NR4A3                                                                                                                                                                                                                                                                                                                                                                                                                                                                                                                             | 4  | 7.20E-02 | 5.90E-01 |
| GOTERM_BP_DIRECT             | steroid hormone mediated signaling pathway                                                      | NR2F2, NR4A1, NR4A2, NR4A3                                                                                                                                                                                                                                                                                                                                                                                                                                                                                                                             | 4  | 7.60E-02 | 6.50E-01 |
| GOTERM_BP_DIRECT             | transcription initiation from RNA polymerase II promoter                                        | CTGF, NR4A1, NR4A2, NR4A3, PPARGC1A                                                                                                                                                                                                                                                                                                                                                                                                                                                                                                                    | 5  | 2.70E-01 | 9.50E-01 |
| <b>Annotation Cluster 12</b> |                                                                                                 | <b>Enrichment Score: 1.52</b>                                                                                                                                                                                                                                                                                                                                                                                                                                                                                                                          |    |          |          |
| GOTERM_BP_DIRECT             | regulation of cell growth                                                                       | CTGF, IGFBP3, IGFBP4, SGK1, SOCS2, TFR                                                                                                                                                                                                                                                                                                                                                                                                                                                                                                                 | 6  | 1.20E-02 | 2.40E-01 |
| <b>Annotation Cluster 13</b> |                                                                                                 | <b>Enrichment Score: 1.52</b>                                                                                                                                                                                                                                                                                                                                                                                                                                                                                                                          |    |          |          |
| GOTERM_CC_DIRECT             | anchored component of plasma membrane                                                           | EFNA1, GAS1, LYPD3, ULBP2                                                                                                                                                                                                                                                                                                                                                                                                                                                                                                                              | 4  | 9.60E-03 | 2.10E-01 |
| <b>Annotation Cluster 14</b> |                                                                                                 | <b>Enrichment Score: 1.52</b>                                                                                                                                                                                                                                                                                                                                                                                                                                                                                                                          |    |          |          |
| GOTERM_BP_DIRECT             | monocyte chemotaxis                                                                             | CCL2, CCL20, IL6, IL6R                                                                                                                                                                                                                                                                                                                                                                                                                                                                                                                                 | 4  | 3.60E-02 | 4.40E-01 |
| <b>Annotation Cluster 15</b> |                                                                                                 | <b>Enrichment Score: 1.49</b>                                                                                                                                                                                                                                                                                                                                                                                                                                                                                                                          |    |          |          |
| GOTERM_BP_DIRECT             | cellular response to transforming growth factor beta stimulus                                   | EDN1, PPARGC1A, SOX9, WNT4, WNT5A                                                                                                                                                                                                                                                                                                                                                                                                                                                                                                                      | 5  | 1.00E-02 | 2.10E-01 |
| GOTERM_BP_DIRECT             | cartilage development                                                                           | CREB3L2, EDN1, NOG, SOX9, WNT5A                                                                                                                                                                                                                                                                                                                                                                                                                                                                                                                        | 5  | 1.90E-02 | 3.10E-01 |
| <b>Annotation Cluster 16</b> |                                                                                                 | <b>Enrichment Score: 1.47</b>                                                                                                                                                                                                                                                                                                                                                                                                                                                                                                                          |    |          |          |
| GOTERM_BP_DIRECT             | protein phosphorylation                                                                         | BMP2, CSNK1E, CCL2, DCLK1, ERN1, EIF2AK3, IGFBP3, LATS2, MAP3K8, PLK2, PRKCE, PDK4, RUNX3, SIK1, SIK2, SGK1, SMAD2, SNRK, ST3GAL1, TRIB1                                                                                                                                                                                                                                                                                                                                                                                                               | 20 | 3.80E-04 | 2.40E-02 |
| GOTERM_BP_DIRECT             | peptidyl-serine phosphorylation                                                                 | CSNK1E, DCLK1, EIF2AK3, LATS2, PLK2, PRKCE, SGK1                                                                                                                                                                                                                                                                                                                                                                                                                                                                                                       | 7  | 2.10E-02 | 3.40E-01 |
| GOTERM_MF_DIRECT             | protein serine/threonine kinase activity                                                        | CSNK1E, DCLK1, EIF2AK3, ERN1, LATS2, MAP3K8, PLK2, PRKCE, SGK1, SIK1, SIK2, SNRK                                                                                                                                                                                                                                                                                                                                                                                                                                                                       | 12 | 6.20E-02 | 5.70E-01 |
| GOTERM_MF_DIRECT             | protein kinase activity                                                                         | CCL2, CSNK1E, DCLK1, EIF2AK3, MAP3K8, PDK4, PRKCE, SGK223, SNRK, SOX9, TRIB1                                                                                                                                                                                                                                                                                                                                                                                                                                                                           | 11 | 9.30E-02 | 6.30E-01 |
| GOTERM_MF_DIRECT             | magnesium ion binding                                                                           | ERN1, GEM, MAP3K8, SIK1, SIK2, SNRK                                                                                                                                                                                                                                                                                                                                                                                                                                                                                                                    | 6  | 2.80E-01 | 8.90E-01 |
| GOTERM_MF_DIRECT             | ATP binding                                                                                     | CSNK1E, DCLK1, DGKD, EIF2AK3, ERN1, FGFR2, IGF1R, KIT, LATS2, MAP3K8, PDK4, PFKFB3, PIP5K1A, PLK2, PRKCE, RHOBTB3, RIMKLB, RUNX3, SGK1, SGK223, SIK1, SIK2, SLC22A4, SLC22A5, SNRK, TRIB1                                                                                                                                                                                                                                                                                                                                                              | 26 | 5.90E-01 | 1.00E+00 |
| <b>Annotation Cluster 17</b> |                                                                                                 | <b>Enrichment Score: 1.43</b>                                                                                                                                                                                                                                                                                                                                                                                                                                                                                                                          |    |          |          |
| GOTERM_BP_DIRECT             | cellular response to dexamethasone stimulus                                                     | CCL2, CASP9, ERRF1, FOXO1, IL6                                                                                                                                                                                                                                                                                                                                                                                                                                                                                                                         | 5  | 1.50E-03 | 5.70E-02 |
| GOTERM_BP_DIRECT             | response to antibiotic                                                                          | CCL2, CASP9, IL6                                                                                                                                                                                                                                                                                                                                                                                                                                                                                                                                       | 3  | 1.10E-01 | 7.30E-01 |
| <b>Annotation Cluster 18</b> |                                                                                                 | <b>Enrichment Score: 1.42</b>                                                                                                                                                                                                                                                                                                                                                                                                                                                                                                                          |    |          |          |
| GOTERM_BP_DIRECT             | endoderm formation                                                                              | DKK, DUSP1, DUSP4, DUSP5, NOG, SMAD2                                                                                                                                                                                                                                                                                                                                                                                                                                                                                                                   | 6  | 1.10E-06 | 3.50E-04 |
| GOTERM_BP_DIRECT             | peptidyl-threonine dephosphorylation                                                            | DUSP1, DUSP4, DUSP5, PPM1D                                                                                                                                                                                                                                                                                                                                                                                                                                                                                                                             | 4  | 7.60E-04 | 3.50E-02 |
| GOTERM_MF_DIRECT             | MAP kinase tyrosine/serine/threonine phosphatase activity                                       | DKK, DUSP1, DUSP4, DUSP5, NOG, SMAD2                                                                                                                                                                                                                                                                                                                                                                                                                                                                                                                   | 3  | 2.00E-02 | 3.80E-01 |
| GOTERM_BP_DIRECT             | inactivation of MAPK activity                                                                   | DUSP1, DUSP4, DUSP5                                                                                                                                                                                                                                                                                                                                                                                                                                                                                                                                    | 3  | 6.90E-02 | 6.20E-01 |
| GOTERM_MF_DIRECT             | phosphatase activity                                                                            | DUSP4, DUSP5, PTP4A1                                                                                                                                                                                                                                                                                                                                                                                                                                                                                                                                   | 3  | 1.50E-01 | 7.60E-01 |
| GOTERM_BP_DIRECT             | peptidyl-tyrosine dephosphorylation                                                             | DUSP1, DUSP4, DUSP5, PTP4A1                                                                                                                                                                                                                                                                                                                                                                                                                                                                                                                            | 4  | 2.40E-01 | 9.30E-01 |
| GOTERM_MF_DIRECT             | protein tyrosine phosphatase activity                                                           | DUSP1, DUSP4, DUSP5, PTP4A1                                                                                                                                                                                                                                                                                                                                                                                                                                                                                                                            | 4  | 2.50E-01 | 8.80E-01 |
| <b>Annotation Cluster 19</b> |                                                                                                 | <b>Enrichment Score: 1.37</b>                                                                                                                                                                                                                                                                                                                                                                                                                                                                                                                          |    |          |          |
| GOTERM_MF_DIRECT             | symporter activity                                                                              | SLC10A7, SLC16A6, SLC16A14, SLC22A4, SLC22A5, SLC38A2                                                                                                                                                                                                                                                                                                                                                                                                                                                                                                  | 6  | 1.80E-03 | 7.40E-02 |
| GOTERM_BP_DIRECT             | sodium ion transport                                                                            | ATP13B, SGK1, SLC10A7, SLC22A4, SLC22A5, SLC38A2                                                                                                                                                                                                                                                                                                                                                                                                                                                                                                       | 6  | 1.30E-02 | 2.40E-01 |
| GOTERM_BP_DIRECT             | transmembrane transport                                                                         | FLVCR2, SLC10A7, SLC16A6, SLC16A14                                                                                                                                                                                                                                                                                                                                                                                                                                                                                                                     | 4  | 8.00E-01 | 1.00E+00 |
| <b>Annotation Cluster 20</b> |                                                                                                 | <b>Enrichment Score: 1.31</b>                                                                                                                                                                                                                                                                                                                                                                                                                                                                                                                          |    |          |          |
| UP_SEQ_FEATURE               | DNA-binding region:Homeobox; TALE-type                                                          | IRX1, IRX2, IRX4, TGIF1                                                                                                                                                                                                                                                                                                                                                                                                                                                                                                                                | 4  | 3.40E-03 | 3.30E-01 |
| INTERPRO                     | Iroquois-class homeodomain protein                                                              | IRX1, IRX2, IRX4                                                                                                                                                                                                                                                                                                                                                                                                                                                                                                                                       | 3  | 3.70E-03 | 3.00E-01 |

## Indacaterol (6h)

|                             |                      |                                                                                                                                                                                           |              |                |                  |
|-----------------------------|----------------------|-------------------------------------------------------------------------------------------------------------------------------------------------------------------------------------------|--------------|----------------|------------------|
| <b>Annotation Cluster 1</b> |                      | <b>Enrichment Score: 4.86</b>                                                                                                                                                             |              |                |                  |
| GOTERM_CC_DIRECT            | extracellular space  | ALB, BAGALT1, C1QTNF6, CCL2, CD59, CES3, CMTM6, DEFB1, DMBT1, ENOX1, GDF15, GPC3, IGFBP3, IGFBP4, IL20, KRTR86, LPL, MCAM, MSMB, PAPP, SFTPD, SMPDL3A, SRGN, TFP1, VCAN, WNT4, WNT5A      | 27           | 1.20E-03       | 5.50E-02         |
| GOTERM_CC_DIRECT            | extracellular region | ADAM12, ALB, CCL2, CD55, COL4A3, CRISPLD1, CRISPLD2, DEFB1, DMBT1, ESR2, FAM198A, FGFR2, GDF15, IGFBP3, IGFBP4, IL20, LPL, MFAP5, NETO1, NPC1, PAPP, SFTPD, SRGN, TFP1, VCAN, WNT4, WNT5A | 27           | 1.20E-02       | 2.60E-01         |
| <b>Annotation Cluster 2</b> |                      | <b>Enrichment Score: 3.77</b>                                                                                                                                                             |              |                |                  |
|                             |                      | <b>Genes</b>                                                                                                                                                                              | <b>Count</b> | <b>P-Value</b> | <b>Benjamini</b> |

|                             |                                                              |                                                                                                                                                                                                                                                                                                                                                                                                                                                                                                                                                                                                                                                                                                      |    |          |          |
|-----------------------------|--------------------------------------------------------------|------------------------------------------------------------------------------------------------------------------------------------------------------------------------------------------------------------------------------------------------------------------------------------------------------------------------------------------------------------------------------------------------------------------------------------------------------------------------------------------------------------------------------------------------------------------------------------------------------------------------------------------------------------------------------------------------------|----|----------|----------|
| GOTERM_CC_DIRECT            | integral component of plasma membrane                        | ADGRG2, AVPR2, BDKRB2, CSAR1, CD200, CD55, CDH4, CNR1, DCLK1, EPHA5, FGFR2, GPC3, GPRC5A, IGF1R, KCNK15, LPAR6, NPC1, NRXN3, PLPP3, PTPRO, SLC6A15, SLC7A2, SLC7A11, SLC16A6, SLC22A3, SLC22A4, SLC22A5, SLC26A2, STEAP4, TM4SF1, ACKR1, ADAM12, ADAM22, ADGRD1, AKAP12, ANTXR1, ATP1B3, AVPR2, B4GALT1, BDKRB2, CSAR1, CACNA2D3, CD55, CD59, CD200, CDH4, CFTR, CLMP, CNR1, COBL, DNER, DOCK4, ENOX1, EPHA5, FGFR2, GAS1, GNAL, GPC3, GPRC5A, GUCY1A2, IGF1R, ITPR1, JUP, KCNG1, KCNK15, LPAR6, LPL, MCAM, MDM2, NFASC, NOS3, PCDH9, PHLDB2, PLPP3, PTPRO, RAP1GAP2, RGS2, SIRPA, SLC6A15, SLC7A2, SLC7A11, SLC16A14, SLC22A3, SLC22A4, SLC22A5, SLC26A2, SLC04A1, STEAP4, SYTL2, TFPI, WNT4, WNT5A | 32 | 3.70E-05 | 7.30E-03 |
| GOTERM_CC_DIRECT            | plasma membrane                                              | ACKR1, ADAM12, ADAM22, ADGRD1, ADGRG2, ANTXR1, AVPR2, B4GALT1, BDKRB2, C15orf48, C1QTNF6, CD200, CDH4, CFTR, CLMP, CMTM6, CNR1, DNER, EPHA5, FGFR2, GALNT15, GAS1, GPAT3, GPRC5A, GRAMD1B, HRK, IGF1R, ITPR1, LPAR6, MARC1, MCAM, NETO1, NFASC, NPC1, NRXN3, PAPP, PCDH9, PDE3A, PHLDB2, PLDS, PLXDC2, PTPRO, RNF150, SHISA2, SIRPA, SLC6A15, SLC7A11, SLC16A6, SLC16A14, SLC22A3, SLC22A4, SLC22A5, SLC26A2, SLC04A1, SPTLC3, SPTSSA, STEAP4, TM4SF1, TMEM2, TMTC1, UGT1A8, UGT2B28, UST, WNT5A                                                                                                                                                                                                     | 62 | 7.60E-04 | 7.20E-02 |
| GOTERM_CC_DIRECT            | integral component of membrane                               | ACKR1, ADAM12, ADAM22, ADGRD1, ADGRG2, ANTXR1, AVPR2, B4GALT1, BDKRB2, C15orf48, C1QTNF6, CD200, CDH4, CFTR, CLMP, CMTM6, CNR1, DNER, EPHA5, FGFR2, GALNT15, GAS1, GPAT3, GPRC5A, GRAMD1B, HRK, IGF1R, ITPR1, LPAR6, MARC1, MCAM, NETO1, NFASC, NPC1, NRXN3, PAPP, PCDH9, PDE3A, PHLDB2, PLDS, PLXDC2, PTPRO, RNF150, SHISA2, SIRPA, SLC6A15, SLC7A11, SLC16A6, SLC16A14, SLC22A3, SLC22A4, SLC22A5, SLC26A2, SLC04A1, SPTLC3, SPTSSA, STEAP4, TM4SF1, TMEM2, TMTC1, UGT1A8, UGT2B28, UST, WNT5A                                                                                                                                                                                                     | 64 | 5.10E-02 | 5.20E-01 |
| <b>Annotation Cluster 3</b> |                                                              | <b>Enrichment Score: 2.10</b>                                                                                                                                                                                                                                                                                                                                                                                                                                                                                                                                                                                                                                                                        |    |          |          |
| GOTERM_BP_DIRECT            | cell fate commitment                                         | FGFR2, GAS1, HEY1, PRDM1, WNT4, WNT5A                                                                                                                                                                                                                                                                                                                                                                                                                                                                                                                                                                                                                                                                | 6  | 1.10E-04 | 7.70E-02 |
| GOTERM_BP_DIRECT            | epithelial to mesenchymal transition                         | FGFR2, WNT4, WNT5A                                                                                                                                                                                                                                                                                                                                                                                                                                                                                                                                                                                                                                                                                   | 3  | 4.90E-02 | 9.10E-01 |
| <b>Annotation Cluster 4</b> |                                                              | <b>Enrichment Score: 2.10</b>                                                                                                                                                                                                                                                                                                                                                                                                                                                                                                                                                                                                                                                                        |    |          |          |
| GOTERM_BP_DIRECT            | cAMP catabolic process                                       | PDE3A, PDE4D, PDE7B, PDE10A                                                                                                                                                                                                                                                                                                                                                                                                                                                                                                                                                                                                                                                                          | 4  | 4.60E-04 | 2.00E-01 |
| GOTERM_MF_DIRECT            | 3',5'-cyclic-AMP phosphodiesterase activity                  | PDE3A, PDE4D, PDE7B, PDE10A                                                                                                                                                                                                                                                                                                                                                                                                                                                                                                                                                                                                                                                                          | 4  | 4.90E-04 | 1.80E-01 |
| GOTERM_MF_DIRECT            | 3',5'-cyclic-nucleotide phosphodiesterase activity           | PDE3A, PDE4D, PDE10A                                                                                                                                                                                                                                                                                                                                                                                                                                                                                                                                                                                                                                                                                 | 3  | 2.50E-02 | 7.60E-01 |
| GOTERM_MF_DIRECT            | cAMP binding                                                 | PDE3A, PDE4D, PDE10A                                                                                                                                                                                                                                                                                                                                                                                                                                                                                                                                                                                                                                                                                 | 3  | 2.70E-02 | 7.40E-01 |
| <b>Annotation Cluster 5</b> |                                                              | <b>Enrichment Score: 2.08</b>                                                                                                                                                                                                                                                                                                                                                                                                                                                                                                                                                                                                                                                                        |    |          |          |
| GOTERM_BP_DIRECT            | quaternary ammonium group transport                          | SLC22A3, SLC22A4, SLC22A5                                                                                                                                                                                                                                                                                                                                                                                                                                                                                                                                                                                                                                                                            | 3  | 1.10E-03 | 3.10E-01 |
| GOTERM_MF_DIRECT            | quaternary ammonium group transmembrane transporter activity | SLC22A3, SLC22A4, SLC22A5                                                                                                                                                                                                                                                                                                                                                                                                                                                                                                                                                                                                                                                                            | 3  | 1.10E-03 | 2.00E-01 |
| <b>Annotation Cluster 6</b> |                                                              | <b>Enrichment Score: 2.02</b>                                                                                                                                                                                                                                                                                                                                                                                                                                                                                                                                                                                                                                                                        |    |          |          |
| GOTERM_CC_DIRECT            | proteinaceous extracellular matrix                           | ADAMTSL1, COL4A3, CRISPLD2, GPC3, SFTPD, SMOG1, TFPI2, VCAN, WNT4, WNT5A                                                                                                                                                                                                                                                                                                                                                                                                                                                                                                                                                                                                                             | 10 | 1.70E-03 | 6.50E-02 |
| GOTERM_CC_DIRECT            | endoplasmic reticulum lumen                                  | ADAMTSL1, CES3, COL4A3, WNT4, WNT5A                                                                                                                                                                                                                                                                                                                                                                                                                                                                                                                                                                                                                                                                  | 5  | 1.30E-01 | 7.70E-01 |
| <b>Annotation Cluster 7</b> |                                                              | <b>Enrichment Score: 1.73</b>                                                                                                                                                                                                                                                                                                                                                                                                                                                                                                                                                                                                                                                                        |    |          |          |
| GOTERM_MF_DIRECT            | symporter activity                                           | SLC16A6, SLC16A14, SLC22A4, SLC22A5                                                                                                                                                                                                                                                                                                                                                                                                                                                                                                                                                                                                                                                                  | 4  | 1.70E-02 | 6.80E-01 |
| <b>Annotation Cluster 8</b> |                                                              | <b>Enrichment Score: 1.56</b>                                                                                                                                                                                                                                                                                                                                                                                                                                                                                                                                                                                                                                                                        |    |          |          |
| KEGG_PATHWAY                | Pathways in cancer                                           | BDKRB2, CASP9, CEBPA, COL4A3, FGFR2, FOXO1, IGF1R, JUP, LPAR6, MDM2, WNT4, WNT5A                                                                                                                                                                                                                                                                                                                                                                                                                                                                                                                                                                                                                     | 12 | 7.60E-03 | 4.80E-01 |

Indacaterol-induced genes (defined by using Affymetrix probe sets) with significant expression level changes of >1.5-fold (based on a FDR  $P$ -value of <0.1) were subjected to functional annotation clustering using DAVID (default parameters). Clusters with enrichment scores >1.3 are shown.

**Supplemental TABLE 6.** Functional Annotation Clustering of Genes Significantly Repressed by Indacaterol in BEAS-2B Cells at 1h, 2h and 6h.

**Indacaterol (1h)**

| <u>Annotation Cluster 1</u> | <u>Enrichment Score: 1.35</u> | <u>Genes</u>        | <u>Count</u> | <u>P-Value</u> | <u>Benjamini</u> |
|-----------------------------|-------------------------------|---------------------|--------------|----------------|------------------|
| GOTERM_BP_DIRECT            | DNA repair                    | CHEK1, EID3, RECQL5 | 3            | 5.40E-02       | 8.90E-01         |

**Indacaterol (2h)**

| <u>Annotation Cluster 1</u> | <u>Enrichment Score: 2.72</u>                                | <u>Genes</u>                                                                                                                                      | <u>Count</u> | <u>P-Value</u> | <u>Benjamini</u> |
|-----------------------------|--------------------------------------------------------------|---------------------------------------------------------------------------------------------------------------------------------------------------|--------------|----------------|------------------|
| GOTERM_BP_DIRECT            | cell division                                                | BUB1, BORA, CCNF, HMGA2, PARD6B, PSRC1                                                                                                            | 6            | 1.20E-03       | 3.20E-01         |
| GOTERM_BP_DIRECT            | mitotic nuclear division                                     | BUB1, BORA, CCNF, HMGA2                                                                                                                           | 4            | 2.00E-02       | 7.80E-01         |
| GOTERM_CC_DIRECT            | cytosol                                                      | BORA, BUB1, CEP135, KIF23, PARD6B, PKHD1L1, PSRC1, SEC16B, TXNIP                                                                                  | 9            | 5.30E-01       | 1.00E+00         |
| <u>Annotation Cluster 2</u> | <u>Enrichment Score: 1.91</u>                                | <u>Genes</u>                                                                                                                                      | <u>Count</u> | <u>P-Value</u> | <u>Benjamini</u> |
| GOTERM_MF_DIRECT            | DNA binding                                                  | EGR1, EGR3, HJURP, HMGA2, KLF7, SIM1, TOP2A, ZNF99, ZNF547, ZNF556, ZNF594, ZNF738                                                                | 12           | 1.40E-03       | 1.30E-01         |
| GOTERM_BP_DIRECT            | transcription, DNA-templated                                 | EGR3, KLF7, MED13L, SIM1, TXNIP, ZNF99, ZNF547, ZNF552, ZNF556, ZNF594, ZNF738                                                                    | 11           | 1.20E-02       | 7.10E-01         |
| GOTERM_CC_DIRECT            | nucleus                                                      | CCNF, EGR1, EGR3, HJURP, HMGA2, HYLS1, IP6K2, KDM6A, KIF23, KLF7, NUMB, PARD6B, SIM1, TOP2A, TXNIP, ZNF99, ZNF547, ZNF552, ZNF556, ZNF594, ZNF738 | 21           | 1.50E-02       | 7.20E-01         |
| GOTERM_MF_DIRECT            | nucleic acid binding                                         | KLF7, ZNF99, ZNF552, ZNF547, ZNF556, ZNF594, ZNF738                                                                                               | 7            | 2.70E-02       | 7.70E-01         |
| GOTERM_BP_DIRECT            | regulation of transcription, DNA-templated                   | EGR3, HMGA2, ZNF99, ZNF552, ZNF547, ZNF556, ZNF594, ZNF738                                                                                        | 8            | 5.60E-02       | 8.90E-01         |
| GOTERM_CC_DIRECT            | intracellular                                                | KIF23, TRIM59, ZNF99, ZNF547, ZNF552, ZNF556, ZNF738                                                                                              | 7            | 9.10E-02       | 8.10E-01         |
| GOTERM_MF_DIRECT            | metal ion binding                                            | EGR1, EGR3, KDM6A, KLF7, ZNF99, ZNF547, ZNF552, ZNF556, ZNF594                                                                                    | 9            | 1.10E-01       | 9.80E-01         |
| GOTERM_MF_DIRECT            | transcription factor activity, sequence-specific DNA binding | EGR1, EGR3, KLF7, SIM1, ZNF552                                                                                                                    | 5            | 1.90E-01       | 1.00E+00         |
| GOTERM_MF_DIRECT            | zinc ion binding                                             | EGR1, KLF7, SH3RF2, TRIM59, ZSWIM8                                                                                                                | 5            | 3.00E-01       | 1.00E+00         |

**Indacaterol (6h)**

| <u>Annotation Cluster 1</u> | <u>Enrichment Score: 2.31</u>                   | <u>Genes</u>                  | <u>Count</u> | <u>P-Value</u> | <u>Benjamini</u> |
|-----------------------------|-------------------------------------------------|-------------------------------|--------------|----------------|------------------|
| GOTERM_BP_DIRECT            | type I interferon signaling pathway             | EGR1, MX1, OAS1, OAS2, OAS3   | 5            | 1.30E-05       | 3.70E-03         |
| GOTERM_MF_DIRECT            | 2'-5'-oligoadenylate synthetase activity        | OAS1, OAS2, OAS3              | 3            | 2.80E-05       | 2.70E-03         |
| GOTERM_BP_DIRECT            | response to virus                               | IFI44, MX1, OAS1, OAS2, OAS3  | 5            | 1.10E-04       | 1.60E-02         |
| GOTERM_BP_DIRECT            | defense response to virus                       | IFI44L, MX1, OAS1, OAS2, OAS3 | 5            | 5.10E-04       | 4.90E-02         |
| GOTERM_MF_DIRECT            | nucleotidyltransferase activity                 | OAS1, OAS2, OAS3              | 3            | 1.60E-03       | 7.50E-02         |
| GOTERM_BP_DIRECT            | negative regulation of viral genome replication | MX1, OAS1, OAS3               | 3            | 3.70E-03       | 2.40E-01         |
| GOTERM_MF_DIRECT            | double-stranded RNA binding                     | OAS1, OAS2, OAS3              | 3            | 7.90E-03       | 2.30E-01         |
| GOTERM_BP_DIRECT            | interferon-gamma-mediated signaling pathway     | OAS1, OAS2, OAS3              | 3            | 1.10E-02       | 4.20E-01         |
| GOTERM_MF_DIRECT            | transferase activity                            | OAS1, OAS2, OAS3              | 3            | 1.90E-02       | 3.70E-01         |
| GOTERM_BP_DIRECT            | immune response                                 | OAS1, OAS2, OAS3              | 3            | 2.50E-01       | 1.00E+00         |
| GOTERM_MF_DIRECT            | ATP binding                                     | MVK, NAV3, OAS1, OAS2, OAS3   | 5            | 4.20E-01       | 1.00E+00         |

Indacaterol-induced genes (defined by using Affymetrix probe sets) with significant expression level changes of <0.67-fold (based on a FDR P-value of <0.1) were subjected to functional annotation clustering using DAVID (default parameters). Clusters with enrichment scores >1.3 are shown.
